# Supplementary material for: A mild and convenient protocol for the synthesis of quinoxalin-2(1 H )-ones and benzimidazoles
Source: Royal Society of Chemistry journal article supplement (doi:10.1039/d4ra06887d), 2024-01-01

### General Procedure 3: Validation experiments

To investigate the rationality of the proposed mechanism, we employed GC-MS to analyze the reaction of *N*-benzyl-*o*-phenylenediamine (**1a**) with acetoin (**2a**). The results indicate that acetic acid may be derived from the oxidation of acetaldehyde during the reaction. Subsequently, we also investigated the reaction of *N*-benzyl-*o*-phenylenediamine (**1a**) with 1-hydroxychlorohexyl phenyl ketone (**2c**), which resulted in the formation of cyclohexanone. These two experiments support our hypothesis regarding the reaction mechanism. Furthermore, in the reaction of *N*-benzyl-*o*-phenylenediamine (**1a**) with ethyl 3-methyl-2-oxobutanoate (**4a**), we detected the formation of ethyl trifluoroacetate, suggesting that ethanol was generated during the process.

GC-MS analyses were performed using a 7000D GC/TQ instrument (Agilent). The reaction mixture were analyzed on a DB-FFAP column (60 m x 250  $\mu$ m x 0.25  $\mu$ m). Helium at a constant flow rate of 1.2 mL/min was used as carrier gas. The injector was held at 250°C. The temperature rise program of the gas chromatography parameter column incubator was as follows: the oven temperature was held at 50°C for 2 min, then programmed to 80°C for 2 min, and finally kept at 230°C for 3 min. The mass spectrum parameters were set as follows: EI source, ionization energy 70 eV, ion source temperature 230°C, and scanning range *m/z* 40–550. Compound analysis was carried out through the NIST database.

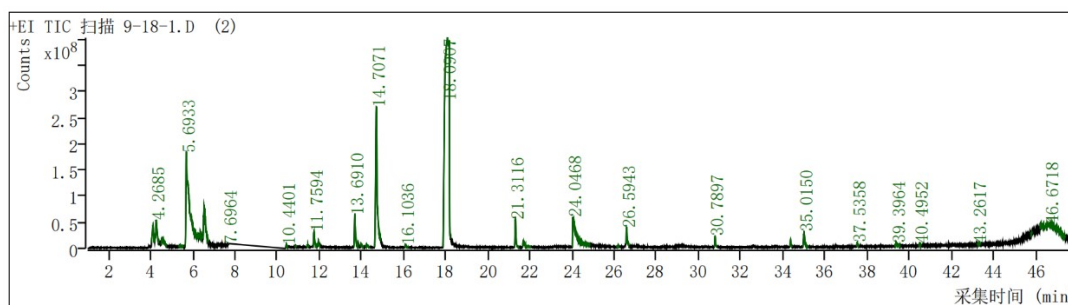

未知物分析报告 - 最佳匹配

| RT      | 化合物名称       | CAS#    | 分子式    | 面积        | MI | 匹配分数 | 面积 (%)_T | 面积 (%)_M |
|---------|-------------|---------|--------|-----------|----|------|----------|----------|
| 24.0468 | Acetic acid | 64-19-7 | C2H4O2 | 768459884 |    | 88.0 | 6.13     | 16.23    |

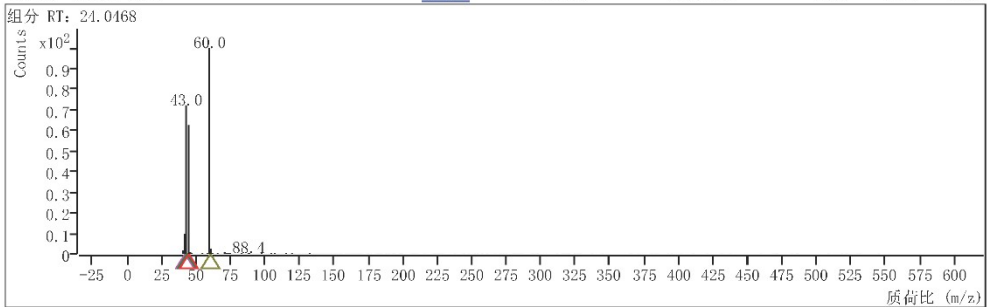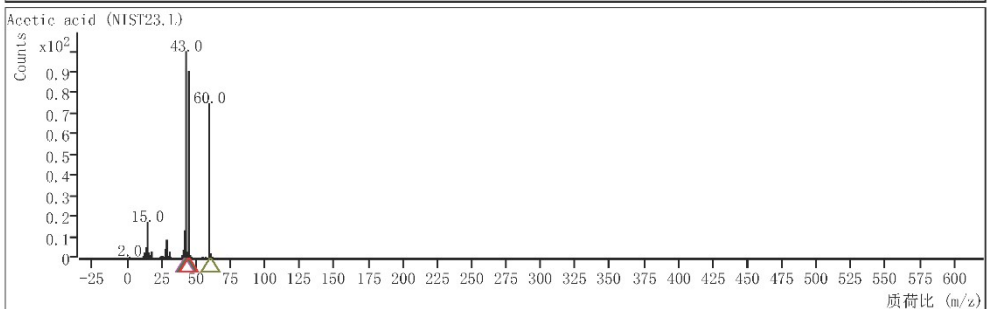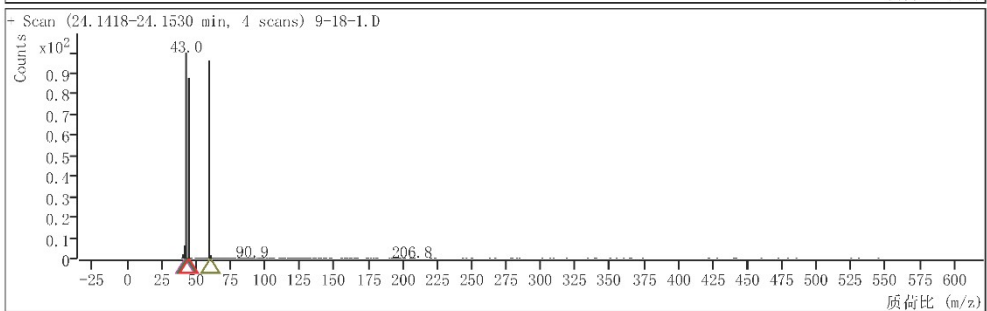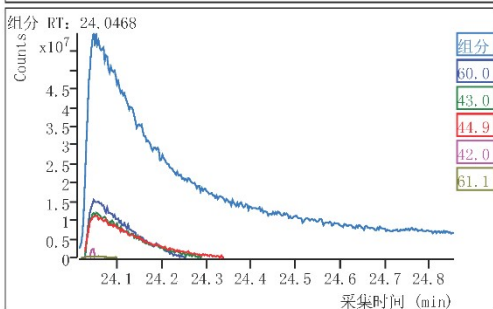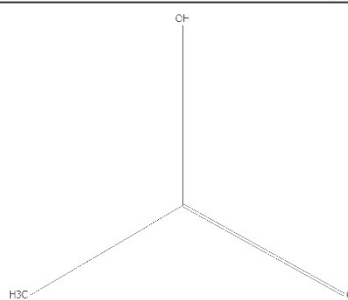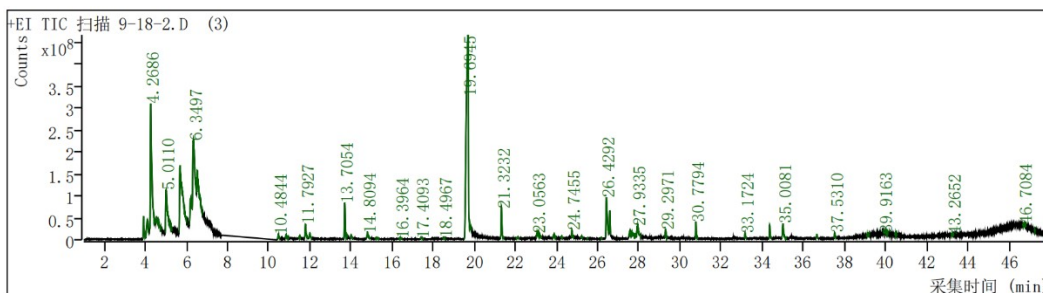

未知物分析报告 - 最佳匹配

| RT     | 化合物名称                                | CAS#     | 分子式      | 面积         | MI | 匹配分数 | 面积 (%)_T | 面积 (%)_M |
|--------|--------------------------------------|----------|----------|------------|----|------|----------|----------|
| 4.2686 | Acetic acid, trifluoro-, ethyl ester | 383-63-1 | C4H5F3O2 | 1381742495 |    | 90.0 | 11.44    | 38.30    |

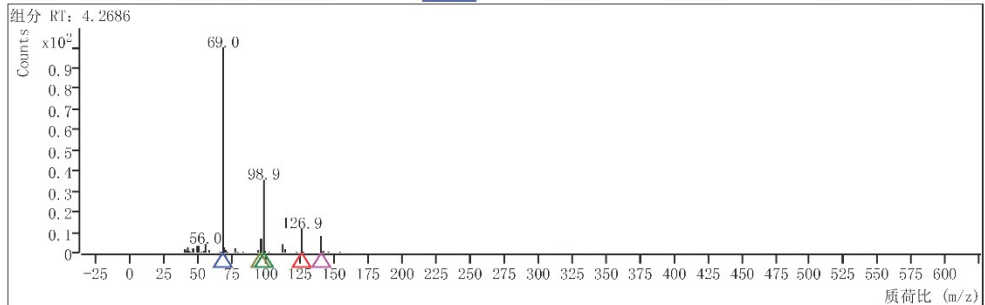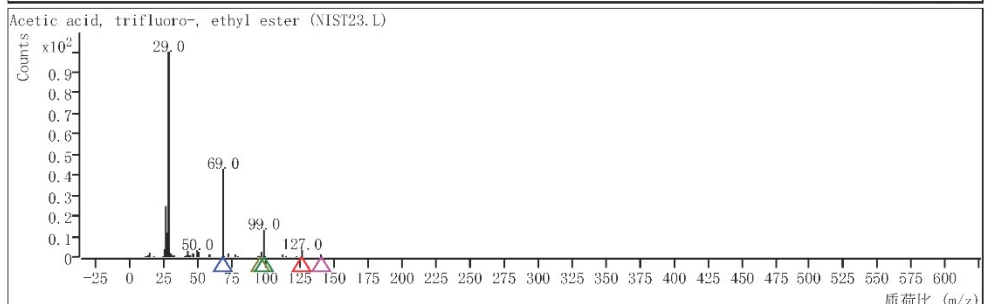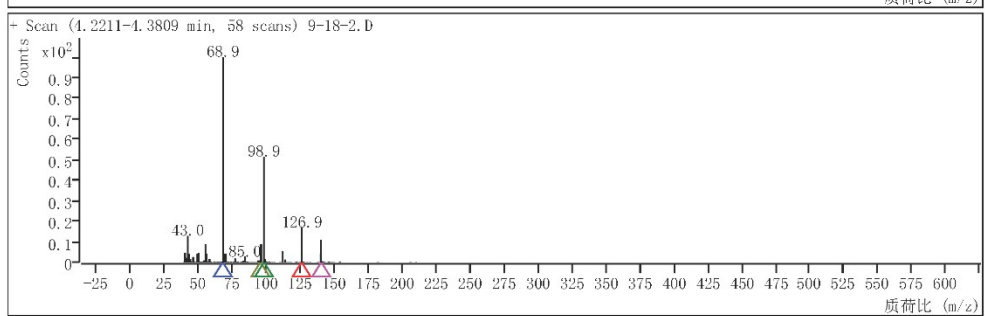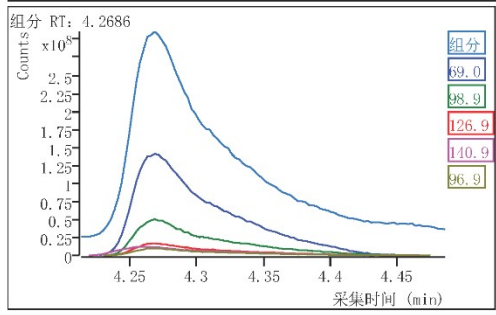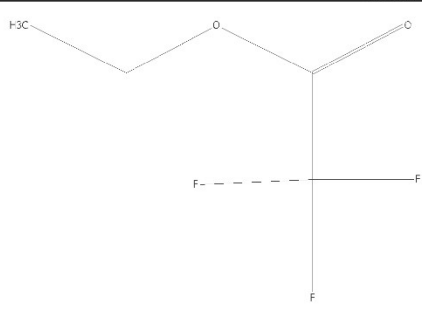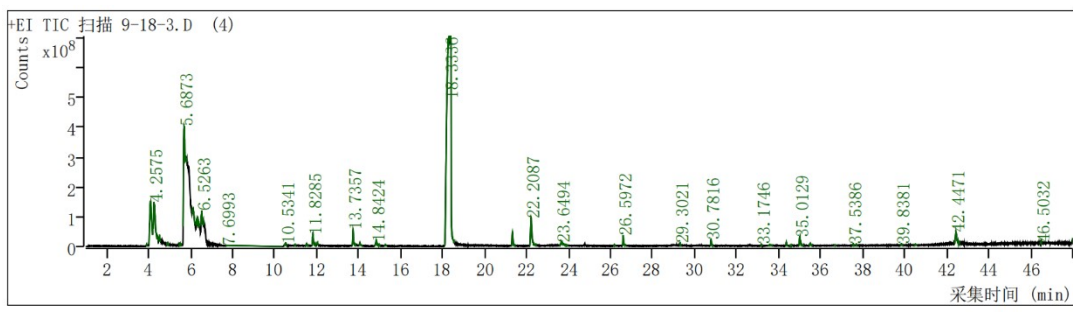

未知物分析报告 - 最佳匹配

| RT      | 化合物名称         | CAS#     | 分子式    | 面积         | MI | 匹配分数 | 面积 (%) <sub>T</sub> | 面积 (%) <sub>M</sub> |
|---------|---------------|----------|--------|------------|----|------|---------------------|---------------------|
| 18.3336 | Cyclohexanone | 105-94-1 | C6H10O | 7077993128 |    | 92.1 | 44.36               | 100.00              |

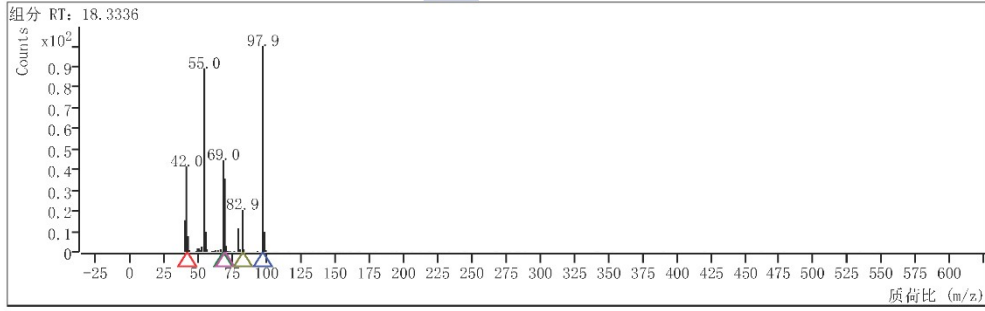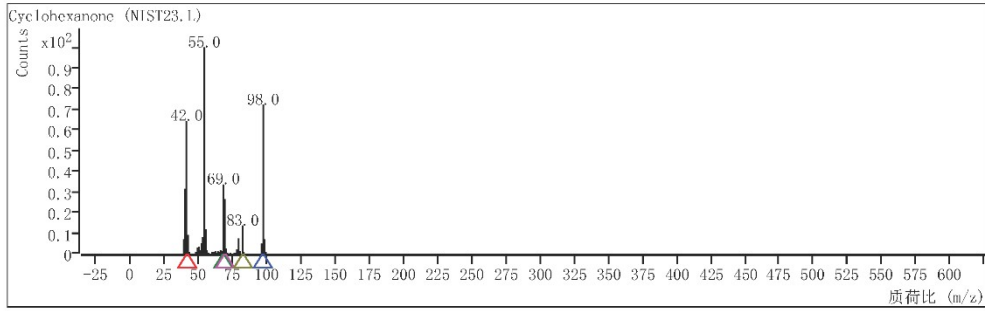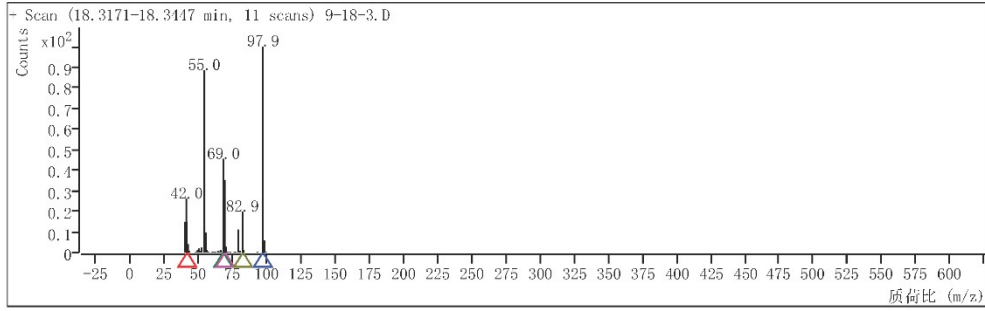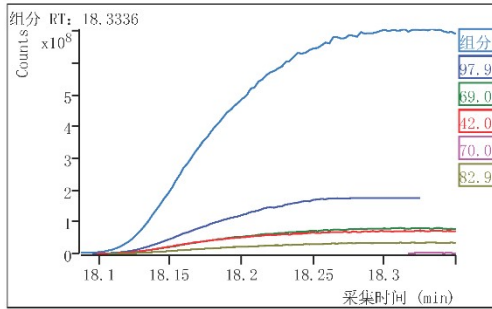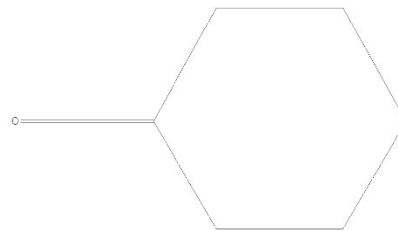

Supplement: d4ra06887d1.pdf [file d4ra06887d1.pdf]
