# Supplementary material for: A mild and convenient protocol for the synthesis of quinoxalin-2(1 H )-ones and benzimidazoles
Source: Royal Society of Chemistry journal article supplement (doi:10.1039/d4ra06887d), 2024-01-01
Supplement: d4ra06887d2.pdf [file d4ra06887d2.pdf]

*Supporting Information (spectra copies) for*

**A mild and convenient protocol for the synthesis of quinoxalin-2(1*H*)-ones and benzimidazoles**

Zhenbiao Luo,\* Mingyuan Wang, Guidong Jiang, Xinye Wang,

Liang Zhao, Zhihui Hu, Honghe Li and Qing Ji

Department of Brewing Engineering, Moutai Institute, Guizhou, Renhuai 564507, China.

[luozhenbiao@mtxy.edu.cn](mailto:luozhenbiao@mtxy.edu.cn)

**Table of Contents**

**General**

|                                                                        |                |
|------------------------------------------------------------------------|----------------|
| <b>Information.....</b>                                                | <b>S2</b>      |
| <b>General procedure.....</b>                                          | <b>S2-S3</b>   |
| <b>GC-MS analysis reports.....</b>                                     | <b>S4-S6</b>   |
| <b>Characterization Data for substrates and products.....</b>          | <b>S7-S20</b>  |
| <b>Copies of the <sup>1</sup>H and <sup>13</sup>C NMR Spectra.....</b> | <b>S21-S83</b> |
| <b>References.....</b>                                                 | <b>S84</b>     |

**General information**

For product purification by flash column chromatography, silica gel (200~300 mesh) and petroleum ether (bp. 60~90 °C) are used. All solvents were purified and dried by standard techniques. All experiments were conducted in open flask at room temperature, unless otherwise specified. All organic extracts were dried over Na<sub>2</sub>SO<sub>4</sub>. <sup>1</sup>H NMR and <sup>13</sup>C NMR spectra were taken on Bruker AM-500 spectrometer with TMS as an internal standard and CDCl<sub>3</sub> as solvent.

*N*-protected-*o*-phenylenediamines **1**<sup>1</sup> were prepared according to literature procedures. The rest of chemicals were purchased from Beijing InnoChem Science&Technology Co., Ltd.

**General Procedure 1: The Synthesis of *N*-protected-*o*-phenylenediamines<sup>1</sup>**

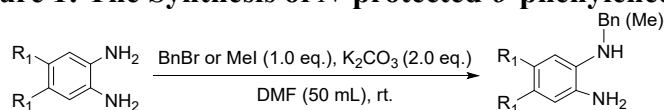

A 200 mL round-bottom flask equipped with stir bar was charged with *o*-phenylenediamine (15.0 mmol, 1.2 eq.) in DMF (50.0 mL) was added K<sub>2</sub>CO<sub>3</sub> (30.0 mmol, 2.0 eq.) and benzyl bromide/iodomethane (10.0 mmol, 1.0 eq.) at room temperature for 8 h. The reaction mixture was extracted with ethyl acetate (100 mL),

then the reaction solution was washed with water and saturated NaCl, dried over anhydrous Na<sub>2</sub>SO<sub>4</sub>, the combined organic phases were filtered and concentrated in vacuo. The crude product was purified by silica gel column chromatography on 200-300 mesh silica gel.

### General Procedure 2: The Synthesis of benzimidazoles/quinoxalin-2(1H)-ones and benzimidazoles

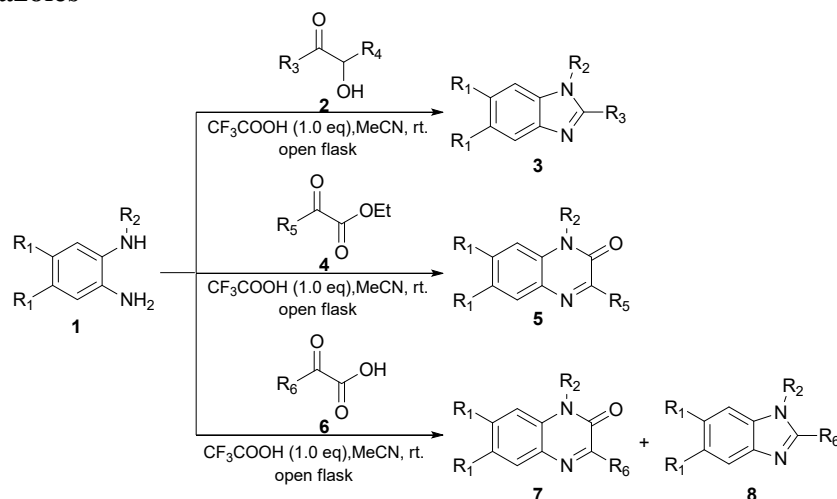

*N*-protected-*o*-phenylenediamine (1.0 eq., 0.6 mmol), α-hydroxy ketone/α-ketoester/α-ketoacid (1.0 eq., 0.6 mmol), CF<sub>3</sub>COOH (1 eq., 0.6 mmol) with MeCN (2.0 mL) and magnetic stirrer were taken in open flask at room for 2 h. The reaction mixture was extracted with ethyl acetate (15.0 mL), the combined organic phases were dried over Na<sub>2</sub>SO<sub>4</sub>, filtered and concentrated in vacuo. The crude product was purified by silica gel column chromatography on 200-300 mesh silica gel afforded benzimidazoles/quinoxalines.

### General Procedure 3: Validation experiments

To investigate the rationality of the proposed mechanism, we employed GC-MS to analyze the reaction of *N*-benzyl-*o*-phenylenediamine (1a) with acetoin (2a). The results indicate that acetic acid may be derived from the oxidation of acetaldehyde during the reaction. Subsequently, we also investigated the reaction of *N*-benzyl-*o*-phenylenediamine (1a) with 1-hydroxychlorohexyl phenyl ketone (2c), which resulted in the formation of cyclohexanone. These two experiments support our hypothesis regarding the reaction mechanism. Furthermore, in the reaction of *N*-benzyl-*o*-phenylenediamine (1a) with ethyl 3-methyl-2-oxobutanoate (4a), we detected the formation of ethyl trifluoroacetate, suggesting that ethanol was generated during the process.

GC-MS analyses were performed using a 7000D GC/TQ instrument (Agilent). The reaction mixture were analyzed on a DB-FFAP column (60 m x 250 μm x 0.25 μm). Helium at a constant flow rate of 1.2 mL/min was used as carrier gas. The injector was held at 250°C. The temperature rise program of the gas chromatography parameter column incubator was as follows: the oven temperature was held at 50°C for 2 min, then programmed to 80°C for 2 min, and finally kept at 230°C for 3 min. The mass spectrum parameters were set as follows: EI source, ionization energy 70 eV, ion source temperature 230°C, and scanning range *m/z* 40–550. Compound analysis was carried out through the NIST database.

## GC-MS analysis reports

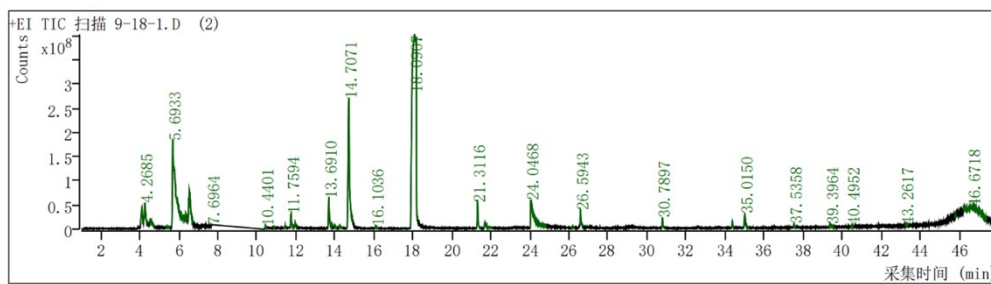

| RT      | 化合物名称       | CAS#                    | 分子式    | 面积 MI     | 匹配分数 | 面积 (%)_I | 面积 (%)_M |
|---------|-------------|-------------------------|--------|-----------|------|----------|----------|
| 24.0468 | Acetic acid | <a href="#">64-19-7</a> | C2H4O2 | 768459884 | 88.0 | 6.13     | 16.23    |

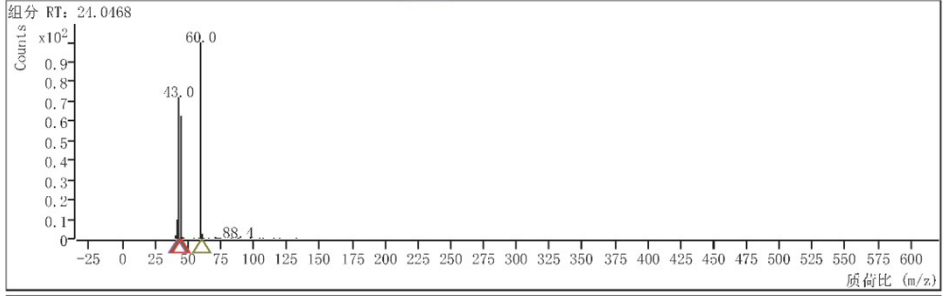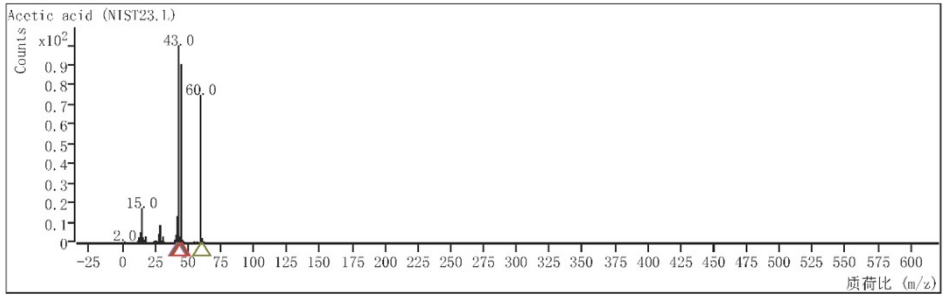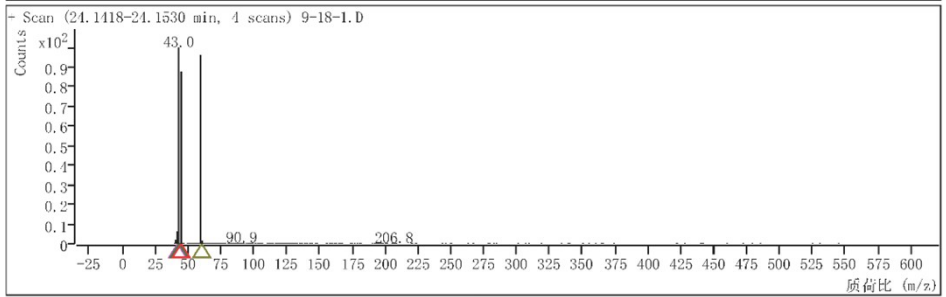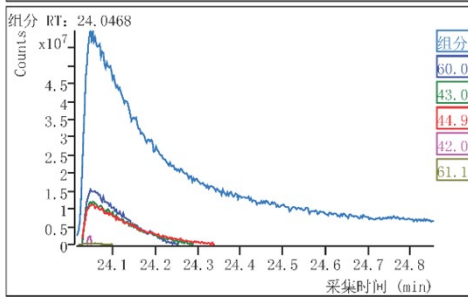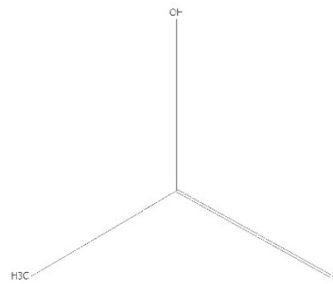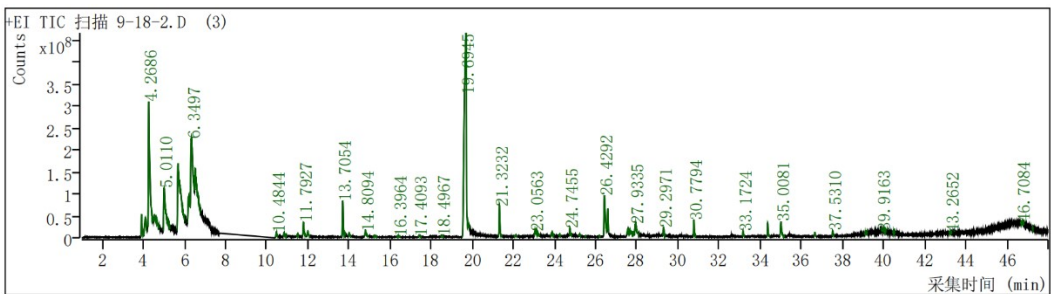

| RT     | 化合物名称                                | CAS#     | 分子式      | 面积 MI       | 匹配分数 | 面积 (%)_T | 面积 (%)_M |
|--------|--------------------------------------|----------|----------|-------------|------|----------|----------|
| 4.2686 | Acetic acid, trifluoro-, ethyl ester | 383-63-1 | C4H5F3O2 | 1381742.495 | 90.0 | 11.44    | 38.30    |

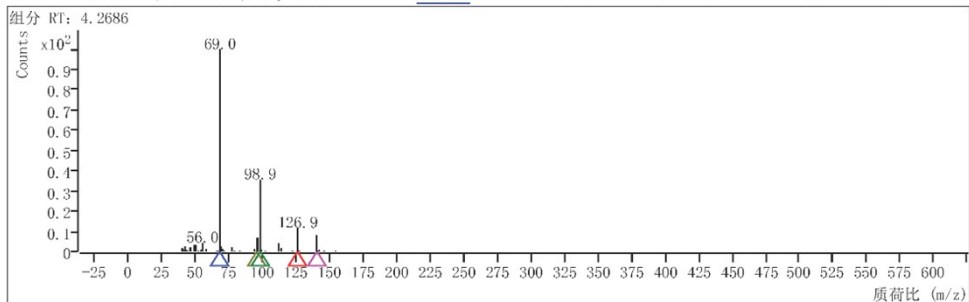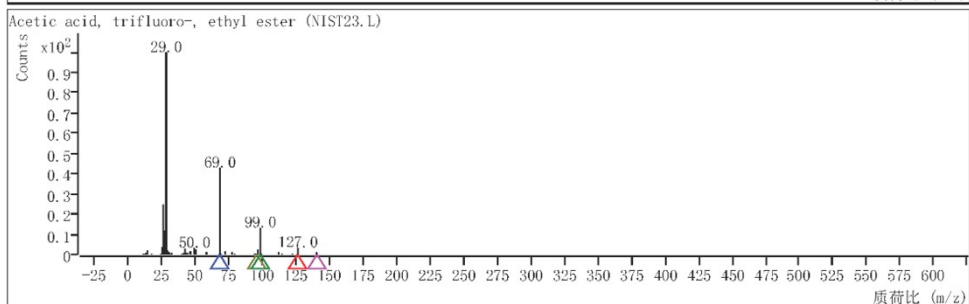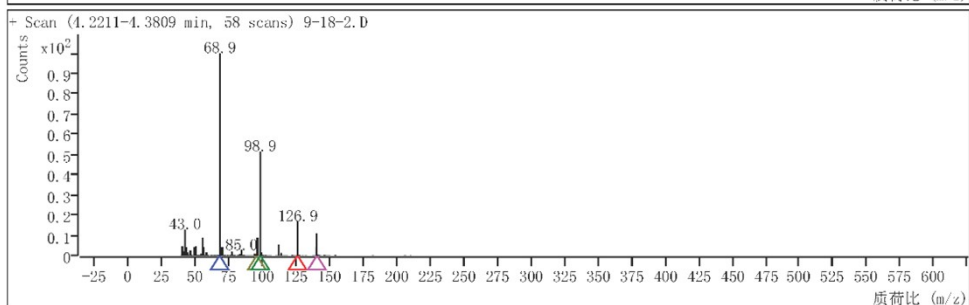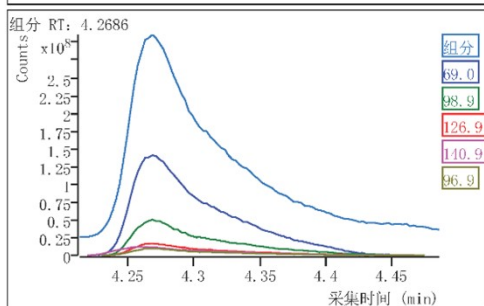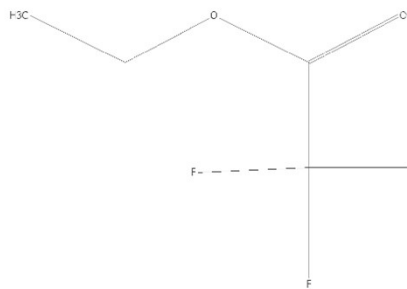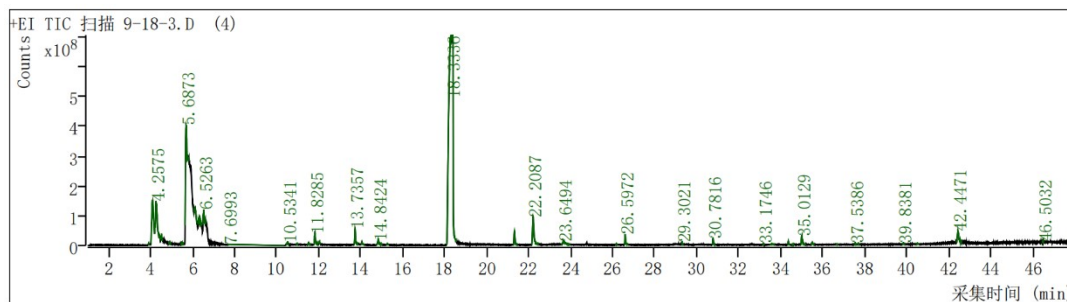

| RT      | 化合物名称         | CAS#                     | 分子式    | 面积 MI      | 匹配分数 | 面积 (%) <sub>T</sub> | 面积 (%) <sub>M</sub> |
|---------|---------------|--------------------------|--------|------------|------|---------------------|---------------------|
| 18.3336 | Cyclohexanone | <a href="#">105-94-1</a> | C6H10O | 7077993128 | 92.1 | 44.36               | 100.00              |

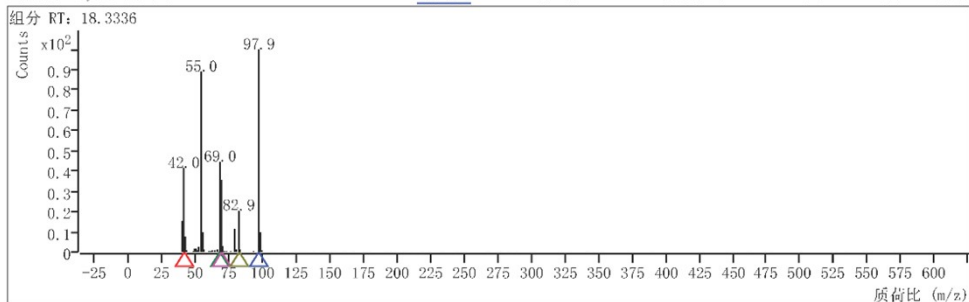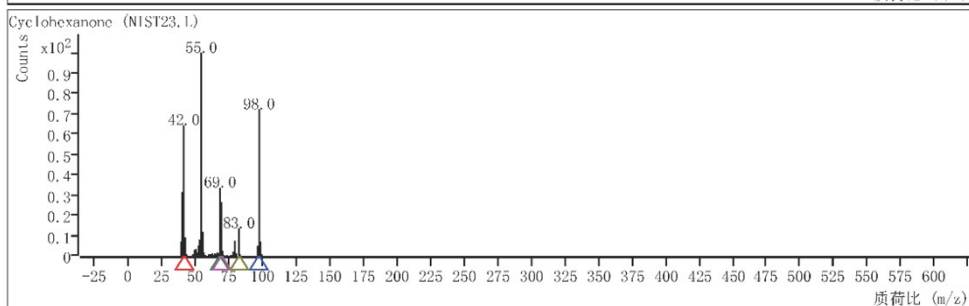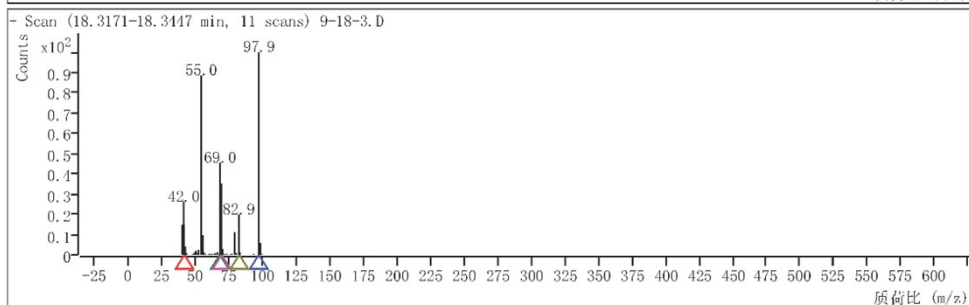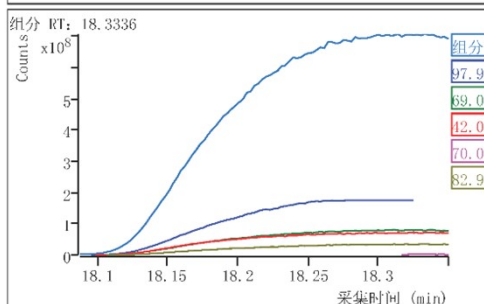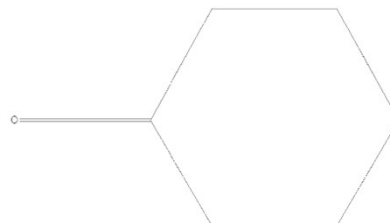

## Characterization Data for substrates and products

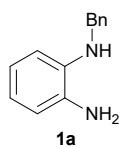

***N*<sup>1</sup>-benzylbenzene-1,2-diamine (1a)<sup>2</sup>.** <sup>1</sup>H NMR (500 MHz, CDCl<sub>3</sub>): δ = 7.39 - 7.33 (m, 4H), 7.29 - 7.28 (m, 1H), 6.81 - 6.78 (m, 1H), 6.71 - 6.66 (m, 3H), 4.30 (s, 2H), 3.67 (br, 1H), 3.32 (br, 2H). <sup>13</sup>C NMR (125 MHz, CDCl<sub>3</sub>): δ = 139.4, 137.7, 134.1, 128.6 (2C), 127.8 (2C), 127.2, 120.7, 118.8, 116.5, 111.9.

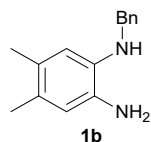

***N*<sup>1</sup>-benzyl-4,5-dimethylbenzene-1,2-diamine (1b).** <sup>1</sup>H NMR (500 MHz, CDCl<sub>3</sub>): δ = 7.39 (d, *J* = 6.0 Hz, 2H), 7.34 (t, *J* = 5.5 Hz, 2H), 7.28 (d, *J* = 5.5 Hz, 1H), 6.53 (s, 1H), 6.49 (s, 1H), 4.27 (s, 2H), 3.29 (br, 3H), 2.14 (s, 3H), 2.13 (s, 3H). <sup>13</sup>C NMR (125 MHz, CDCl<sub>3</sub>): δ = 139.8, 135.6, 132.0, 128.5, 128.1, 127.8, 127.1, 126.4, 118.4, 114.1, 77.3, 77.0, 76.8, 49.0, 19.3, 18.8.

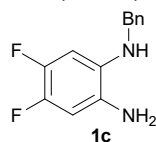

***N*<sup>1</sup>-benzyl-4,5-difluorobenzene-1,2-diamine (1c).** <sup>1</sup>H NMR (500 MHz, CDCl<sub>3</sub>): δ = 7.34 (s, 4H), 7.29 (d, *J* = 2.5 Hz, 1H), 6.49 (t, *J* = 9.0 Hz, 1H), 6.42 (dd, *J* = 11.5 Hz, 7.5 Hz, 1H), 4.19 (s, 2H), 3.60 (br, 1H), 3.23 (br, 2H). <sup>13</sup>C NMR (125 MHz, CDCl<sub>3</sub>): δ = 145.4 (d, *J* = 11.3 Hz, 1C), 141.9 (*J* = 11.3 Hz, 1C), 138.5, 133.9 (d, *J* = 6.3 Hz, 1C), 129.9 (d, *J* = 2.5 Hz, 1C), 128.7 (2C), 127.6, 127.5 (2C), 105.3 (d, *J* = 20.0 Hz, 1C), 101.2 (d, *J* = 21.3 Hz, 1C), 48.8.

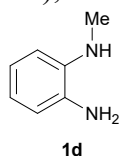

***N*<sup>1</sup>-methylbenzene-1,2-diamine (1d)**<sup>3</sup>. <sup>1</sup>H NMR (500 MHz, CDCl<sub>3</sub>): δ = 6.87 - 6.84 (m, 1H), 6.72 - 6.65 (m, 3H), 3.32 (br, 3H), 2.86 (s, 3H). <sup>13</sup>C NMR (125 MHz, CDCl<sub>3</sub>): δ = 138.9, 134.02, 120.9, 118.4, 116.3, 110.9, 77.3, 77.0, 76.7, 30.9.

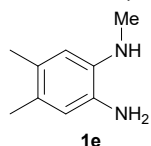

***N*<sup>1</sup>,4,5-trimethylbenzene-1,2-diamine (1e).** <sup>1</sup>H NMR (500 MHz, CDCl<sub>3</sub>): δ = 6.49 (s, 1H), 6.44 (s, 1H), 3.19 (br, 3H), 2.81 (s, 3H), 2.18 (s, 3H), 2.12 (s, 3H). <sup>13</sup>C NMR (125 MHz, CDCl<sub>3</sub>): δ = 136.7, 131.7, 128.0, 125.8, 118.2, 113.1, 77.3, 77.0, 76.8, 31.2, 19.2, 18.7.

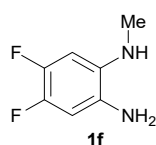

**4,5-difluoro-*N*<sup>1</sup>-methylbenzene-1,2-diamine (1f).** <sup>1</sup>H NMR (500 MHz, CDCl<sub>3</sub>): δ = 6.53 (dd, *J* = 11.0 Hz, 8.0 Hz, 1H), 6.42 (dd, *J* = 12.0 Hz, 7.5 Hz, 1H), 3.23 (br, 3H), 2.81 (s, 3H). <sup>13</sup>C NMR (125 MHz, CDCl<sub>3</sub>): δ = 145.7 (d, *J* = 11.3 Hz, 1C), 141.7 (d, *J* = 12.5 Hz, 1C), 135.4 (d, *J* = 6.3 Hz, 1C), 129.6 (d, *J* = 5.0 Hz, 1C), 105.2 (d, *J* = 20.0 Hz, 1C), 100.2 (d, *J* = 22.5 Hz, 1C), 31.2.

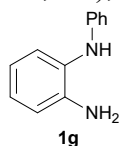

***N*<sup>1</sup>-phenylbenzene-1,2-diamine (1g)**<sup>4</sup>. <sup>1</sup>H NMR (500 MHz, CDCl<sub>3</sub>): δ = 7.23 - 7.18 (m, 2H), 7.12 - 7.11 (m, 1H), 7.02 - 7.00 (m, 1H), 6.83 - 6.72 (m, 5H). <sup>13</sup>C NMR (125

MHz, CDCl<sub>3</sub>)  $\delta$  = 145.3, 141.9, 129.3 (2C), 128.5, 125.7, 124.9, 119.3, 119.1, 116.1, 115.2 (2C).

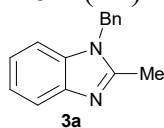

**1-benzyl-2-methyl-1H-benzo[d]imidazole (3a)**<sup>5</sup>. <sup>1</sup>H NMR (500 MHz, CDCl<sub>3</sub>):  $\delta$  = 7.71(d,  $J$  = 7.5 Hz, 1H), 7.21(s, 4H), 7.15(s, 2H), 6.97 (d,  $J$  = 5.0 Hz, 2H), 5.16 (s, 2H), 2.47 (s, 3H). <sup>13</sup>C NMR (125 MHz, CDCl<sub>3</sub>):  $\delta$  = 151.6, 142.2, 135.5, 135.1, 128.7(2C), 127.6, 125.9(2C), 122.0, 121.7, 118.7, 109.1, 46.6, 13.6.

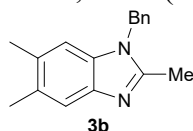

**1-benzyl-2,5,6-trimethyl-1H-benzo[d]imidazole (3b)**<sup>5</sup>. <sup>1</sup>H NMR (500 MHz, CDCl<sub>3</sub>):  $\delta$  = 7.47(s, 1H), 7.23-7.22(m, 3H), 6.98-6.94 (m, 3H), 5.14 (s, 2H), 2.45(s, 3H), 2.32 (s, 3H), 2.28 (s, 3H). <sup>13</sup>C NMR (125 MHz, CDCl<sub>3</sub>):  $\delta$  = 150.6, 140.9, 135.9, 133.7, 130.8, 130.3, 128.6(2C), 127.4, 125.8(2C), 118.9, 109.3, 46.5, 20.2, 19.9, 13.5.

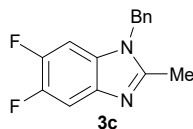

**1-benzyl-2-ethyl-5,6-difluoro-1H-benzo[d]imidazole (3c)**. <sup>1</sup>H NMR (500 MHz, CDCl<sub>3</sub>):  $\delta$  = 7.34 - 7.31 (m, 1H), 7.12 (d,  $J$  = 7.0 Hz, 2H), 6.89 (d,  $J$  = 6.0 Hz, 2H), 6.85 - 6.82 (m, 1H), 5.11 (s, 2H), 2.41 (s, 3H). <sup>13</sup>C NMR (125 MHz, CDCl<sub>3</sub>):  $\delta$  = 153.3, 148.3 (dd,  $J$  = 22.5 Hz, 12.5 Hz, 1C), 146.4 (dd,  $J$  = 18.8 Hz, 15.0 Hz, 1C), 137.5 (d,  $J$  = 10.0 Hz, 1C), 134.8, 130.4 (d,  $J$  = 11.2 Hz, 1C), 128.9 (2C), 127.9, 125.9 (2C), 106.1 (d,  $J$  = 18.8 Hz, 1C), 97.4 (d,  $J$  = 22.5 Hz, 1C), 47.2, 13.7.

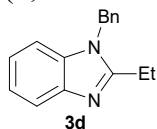

**1-benzyl-2-ethyl-1H-benzo[d]imidazole (3d)**<sup>6</sup>. <sup>1</sup>H NMR (500 MHz, CDCl<sub>3</sub>):  $\delta$  = 7.66 (d,  $J$  = 10.0 Hz, 1H), 7.09 (s, 4H), 7.02 (s, 2H), 6.85 (d,  $J$  = 5.0 Hz, 2H), 5.06 (s, 2H), 2.65 (q,  $J$  = 15.0 Hz, 5.0 Hz, 2H), 1.26 (t,  $J$  = 5.0 Hz, 3H). <sup>13</sup>C NMR (125 MHz, CDCl<sub>3</sub>):  $\delta$  = 156.0, 142.3, 135.7, 135.2, 128.6 (2C), 127.5, 125.8 (2C), 122.0, 121.6, 118.9, 46.4, 20.6, 11.4.

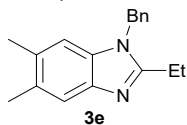

**1-benzyl-2-ethyl-5,6-dimethyl-1H-benzo[d]imidazole (3e)**: <sup>1</sup>H NMR (500 MHz, CDCl<sub>3</sub>)  $\delta$  = 7.40 (s, 1H), 7.07 - 7.05 (m, 3H), 6.83 - 6.79 (m, 3H), 4.99 (s, 2H), 2.59 (q,  $J$  = 7.5 Hz, 15.0 Hz, 2H), 2.17 (s, 3H), 2.12 (s, 3H), 1.21 (t,  $J$  = 7.5 Hz, 3H). <sup>13</sup>C NMR (125 MHz, CDCl<sub>3</sub>)  $\delta$  = 155.0, 140.7, 135.9, 133.6, 130.7, 130.1, 128.4 (2C), 127.2, 125.6 (2C), 118.9, 109.3, 46.1, 20.1, 20.0, 19.8, 11.3.

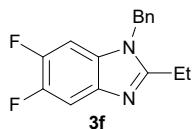



**1-benzyl-2-ethyl-5,6-difluoro-1H-benzo[d]imidazole (3f).**  $^1\text{H}$  NMR (500 MHz,  $\text{CDCl}_3$ ):  $\delta$  = 7.38 (t,  $J$  = 9.5 Hz, 1H), 7.17 - 7.16 (m, 1H), 6.89 - 6.88 (m, 1H), 6.82 (t,  $J$  = 8.0 Hz, 1H), 5.13 (s, 2H), 2.72 - 2.70 (m, 2H), 1.27 (t,  $J$  = 7.0 Hz, 3H).  $^{13}\text{C}$  NMR (125 MHz,  $\text{CDCl}_3$ ):  $\delta$  = 157.8, 148.3 (dd,  $J$  = 25.0 Hz, 15.0 Hz, 1C), 146.4 (dd,  $J$  = 23.8 Hz, 15.0 Hz, 1C), 137.5 (d,  $J$  = 10.0 Hz, 1C), 135.0, 130.5 (d,  $J$  = 11.3 Hz, 1C), 128.9 (2C), 127.9, 125.8 (2C), 106.3 (d,  $J$  = 20.0 Hz, 1C), 97.4 (d,  $J$  = 22.5 Hz, 1C), 46.9, 20.8, 11.3.

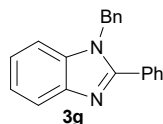

**1-benzyl-2-phenyl-1H-benzo[d]imidazole (3g)**<sup>7</sup>.  $^1\text{H}$  NMR (500 MHz,  $\text{CDCl}_3$ ):  $\delta$  = 7.87 (d,  $J$  = 7.5 Hz, 1H), 7.69 (d,  $J$  = 5.5 Hz, 2H), 7.46 (s, 3H), 7.32 (d,  $J$  = 7.0 Hz, 4H), 7.24 - 7.21 (m, 2H), 7.10 (d,  $J$  = 5.5 Hz, 2H), 5.45 (s, 2H).  $^{13}\text{C}$  NMR (125 MHz,  $\text{CDCl}_3$ ):  $\delta$  = 154.1, 143.2, 136.4, 136.0, 130.1, 129.9 (2C), 129.1 (d,  $J$  = 26.3 Hz, 2C), 128.7 (2C), 127.7, 125.9 (2C), 123.0, 126.6, 120, 110.5, 48.3.

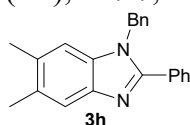

**1-benzyl-5,6-dimethyl-2-phenyl-1H-benzo[d]imidazole (3h)**<sup>1</sup>.  $^1\text{H}$  NMR (500 MHz,  $\text{CDCl}_3$ ):  $\delta$  = 7.66 - 7.62 (m, 3H), 7.42 (s, 3H), 7.32 - 7.28 (m, 3H), 7.10 - 7.08 (m, 2H), 6.97 (s, 1H), 5.39 (s, 2H), 2.38 (s, 3H), 2.31 (s, 3H).  $^{13}\text{C}$  NMR (125 MHz,  $\text{CDCl}_3$ ):  $\delta$  = 153.3, 141.7, 136.7, 134.6, 132.2, 131.5, 130.3, 129.6, 129.1 (2C), 129.0 (2C), 128.6 (2C), 127.6 (2C), 125.8, 120.0, 110.5.

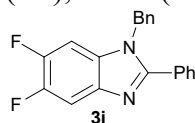

**1-benzyl-5,6-difluoro-2-phenyl-1H-benzo[d]imidazole (3i)**<sup>1</sup>.  $^1\text{H}$  NMR (500 MHz,  $\text{CDCl}_3$ ):  $\delta$  = 7.67 - 7.65 (m, 2H), 7.61 (t,  $J$  = 9.5 Hz, 1H), 7.47 - 7.46 (m, 2H), 7.35 - 7.34 (m, 3H), 7.08 - 7.07 (m, 2H), 6.95 (t,  $J$  = 7.0 Hz, 1H), 5.40 (s, 2H).  $^{13}\text{C}$  NMR (125 MHz,  $\text{CDCl}_3$ ):  $\delta$  = 155.6, 149.1 (t,  $J$  = 15.0 Hz, 1C), 147.2 (t,  $J$  = 15.0 Hz, 1C), 138.3 (d,  $J$  = 10.0 Hz, 1C), 135.5, 131.3 (d,  $J$  = 10.0 Hz, 1C), 130.2, 129.5, 129.2 (2C), 129.1 (2C), 128.9 (2C), 128.1, 125.9 (2C), 107.2 (d,  $J$  = 18.8 Hz, 1C), 98.5 (d,  $J$  = 23.8 Hz, 1C), 48.7.

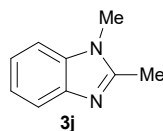

**1,2-dimethyl-1H-benzo[d]imidazole (3j)**<sup>7</sup>.  $^1\text{H}$  NMR (500 MHz,  $\text{CDCl}_3$ ):  $\delta$  = 7.66 (dd,  $J$  = 5.0 Hz, 2.0 Hz, 1H), 7.20 (d,  $J$  = 2.5 Hz, 1H), 3.58 (s, 3H), 2.51 (s, 3H).  $^{13}\text{C}$  NMR (125 MHz,  $\text{CDCl}_3$ ):  $\delta$  = 151.6, 142.3, 135.5, 121.7, 121.5, 118.6, 108.6, 29.5, 13.5.

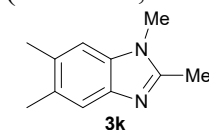

**1,2,5,6-tetramethyl-1H-benzo[d]imidazole (3k)**:  $^1\text{H}$  NMR (500 MHz,  $\text{CDCl}_3$ ):  $\delta$  = 7.39 (s, 1H), 6.91 (s, 1H), 3.45 (s, 3H), 2.42 (s, 3H), 2.32 (s, 3H), 2.31 (s, 3H).  $^{13}\text{C}$  NMR (125 MHz,  $\text{CDCl}_3$ ):  $\delta$  = 150.4, 140.5, 133.8, 130.3, 129.8, 118.5, 108.8, 29.1,

20.0, 19.8, 13.1.

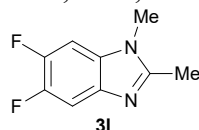

**5,6-difluoro-1,2-dimethyl-1H-benzo[d]imidazole (3l).**  $^1\text{H}$  NMR (500 MHz,  $\text{CDCl}_3$ )  $\delta$  = 7.38 (dd,  $J$  = 10.5 Hz, 7.0 Hz, 1H), 6.97 (dd,  $J$  = 10.0 Hz, 7.0 Hz, 1H), 3.62 (s, 3H), 2.53 (s, 3H).  $^{13}\text{C}$  NMR (125 MHz,  $\text{CDCl}_3$ )  $\delta$  = 153.2, 148.1 (dd, 23.7 Hz, 15.0 Hz, 1C), 146.2 (dd, 21.2 Hz, 15.0 Hz, 1C), 137.1 (d, 11.2 Hz, 1C), 130.7 (d, 11.2 Hz, 1C), 105.7 (d, 20.0 Hz, 1C), 96.7 (d, 22.5 Hz, 1C), 29.7.

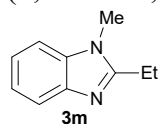

**2-ethyl-1-methyl-1H-benzo[d]imidazole (3m)**<sup>8</sup>.  $^1\text{H}$  NMR (500 MHz,  $\text{CDCl}_3$ ):  $\delta$  = 7.57 (d,  $J$  = 6.0 Hz, 1H), 7.05-6.99 (m, 3H), 3.33 (s, 3H), 2.60 (q,  $J$  = 15.0 Hz, 7.5 Hz, 2H), 1.25 (t,  $J$  = 8.0 Hz, 3H).  $^{13}\text{C}$  NMR (125 MHz,  $\text{CDCl}_3$ ):  $\delta$  = 155.7, 141.8, 135.2, 121.4, 121.1, 118.3, 108.4 (2C), 28.8, 20.2, 11.0.

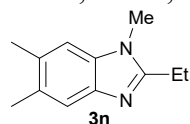

**2-ethyl-1,5,6-trimethyl-1H-benzo[d]imidazole (3n).**  $^1\text{H}$  NMR (500 MHz,  $\text{CDCl}_3$ ):  $\delta$  = 7.45 (s, 1H), 6.93 (s, 1H), 3.47 (s, 3H), 2.73 (q,  $J$  = 15.0 Hz, 7.5 Hz, 2H), 2.33 (s, 3H), 2.31 (s, 3H), 1.37 (t,  $J$  = 7.5 Hz, 3H).  $^{13}\text{C}$  NMR (125 MHz,  $\text{CDCl}_3$ ):  $\delta$  = 154.8, 140.5, 133.9, 130.2, 129.7, 118.7, 108.7, 28.9, 20.2, 20.0, 19.7, 11.2.

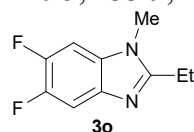

**2-ethyl-5,6-difluoro-1-methyl-1H-benzo[d]imidazole (3o).**  $^1\text{H}$  NMR (500 MHz,  $\text{CDCl}_3$ ):  $\delta$  = 7.30 (dd,  $J$  = 10.5 Hz, 7.5 Hz, 1H), 6.85 (dd,  $J$  = 10.0 Hz, 7.5 Hz, 1H), 3.50 (s, 3H), 2.72 (q,  $J$  = 15.0 Hz, 7.5 Hz, 2H), 1.30 (t,  $J$  = 7.5 Hz, 3H).  $^{13}\text{C}$  NMR (125 MHz,  $\text{CDCl}_3$ ):  $\delta$  = 157.6, 148.0 (dd,  $J$  = 30 Hz, 15.0 Hz, 1C), 146.1 (dd,  $J$  = 27.5 Hz, 15.0 Hz, 1C), 137.1 (d,  $J$  = 10.0 Hz, 1C), 130.8 (d,  $J$  = 11.3 Hz, 1C), 105.9 (d,  $J$  = 20.0 Hz, 1C), 96.6 (d,  $J$  = 23.8 Hz, 1C), 29.4, 20.5, 11.0.

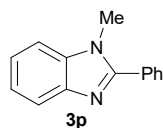

**1-methyl-2-phenyl-1H-benzo[d]imidazole (3p)**<sup>9</sup>.  $^1\text{H}$  NMR (500 MHz,  $\text{CDCl}_3$ ):  $\delta$  = 7.67 (d,  $J$  = 6.5 Hz, 1H), 7.54 (d,  $J$  = 5.0 Hz, 2H), 7.28 (s, 3H), 7.11 (s, 3H), 3.54 (s, 3H).  $^{13}\text{C}$  NMR (125 MHz,  $\text{CDCl}_3$ ):  $\delta$  = 153.3, 142.4, 136.2, 129.7, 129.4, 129.0 (2C), 128.3 (2C), 122.4, 122.1, 119.3, 109.4, 31.2.

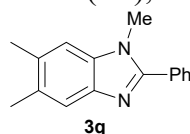

**1,5,6-trimethyl-2-phenyl-1H-benzo[d]imidazole (3q)**<sup>1</sup>.  $^1\text{H}$  NMR (500 MHz,  $\text{CDCl}_3$ ):  $\delta$  = 7.74 (d,  $J$  = 6.5 Hz, 2H), 7.57 (s, 1H), 7.50 (d,  $J$  = 7.0 Hz, 3H), 7.15 (s, 1H), 3.81 (s, 3H), 2.42 (s, 3H), 2.40 (s, 3H).  $^{13}\text{C}$  NMR (125 MHz,  $\text{CDCl}_3$ ):  $\delta$  = 152.9, 141.5,

135.2, 131.9, 131.2, 130.5, 129.4, 129.3 (2C), 128.6 (2C), 119.8, 109.8, 31.6, 20.6, 20.3.

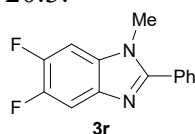

**5,6-difluoro-1-methyl-2-phenyl-1H-benzo[d]imidazole (3r).**  $^1\text{H}$  NMR (500 MHz,  $\text{CDCl}_3$ ):  $\delta$  = 7.73 (s, 2H), 7.60 - 7.54 (m, 4H), 7.18 - 7.17 (m, 1H), 3.83 (s, 3H).  $^{13}\text{C}$  NMR (125 MHz,  $\text{CDCl}_3$ ):  $\delta$  = 155.2, 149.1 (dd,  $J$  = 36.3 Hz, 15.0 Hz, 1C), 147.1 (dd,  $J$  = 33.8 Hz, 16.3 Hz, 1C), 138.0 (d,  $J$  = 10.0 Hz, 1C), 131.9 (d,  $J$  = 11.3 Hz, 1C), 130.0, 129.7, 129.3 (2C), 128.8 (2C), 107.1 (d,  $J$  = 20.0 Hz, 1C), 97.6 (d,  $J$  = 22.5 Hz, 1C), 23.0.

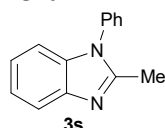

**2-methyl-1-phenyl-1H-benzo[d]imidazole (3s)**<sup>10</sup>.  $^1\text{H}$  NMR (500 MHz,  $\text{CDCl}_3$ ):  $\delta$  = 7.75 (d,  $J$  = 8.0 Hz, 1H), 7.57-7.48 (m, 3H), 7.35 (d,  $J$  = 7.5 Hz, 2H), 7.25 (t,  $J$  = 8.0 Hz, 1H), 7.18 (t,  $J$  = 8.0 Hz, 1H), 7.11 (d,  $J$  = 8.0 Hz, 1H), 2.50 (s, 3H).  $^{13}\text{C}$  NMR (125 MHz,  $\text{CDCl}_3$ ):  $\delta$  = 151.5, 142.6, 136.4, 136.1, 129.9 (2C), 128.8, 127.2 (2C), 122.6, 122.4, 119.0, 109.9, 14.4.

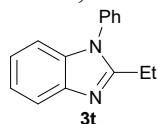

**2-ethyl-1-phenyl-1H-benzo[d]imidazole (3t)**<sup>11</sup>.  $^1\text{H}$  NMR (500 MHz,  $\text{CDCl}_3$ ):  $\delta$  = 7.79 (d,  $J$  = 8.0 Hz, 1H), 7.58 - 7.50 (m, 3H), 7.36 (d,  $J$  = 7.5 Hz, 2H), 7.26 (t,  $J$  = 7.0 Hz, 1H), 7.18 (t,  $J$  = 7.0 Hz, 1H), 7.09 (d,  $J$  = 7.5 Hz, 1H), 2.80 (q,  $J$  = 15.0 Hz, 7.5 Hz, 2H), 1.35 (t,  $J$  = 7.5 Hz, 3H).  $^{13}\text{C}$  NMR (125 MHz,  $\text{CDCl}_3$ ):  $\delta$  = 156.2, 142.5, 136.5, 136.0, 129.8 (2C), 128.8, 127.2 (2C), 122.5, 122.2, 119.0, 109.8, 21.2, 12.0.

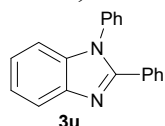

**1,2-diphenyl-1H-benzo[d]imidazole (3u)**<sup>12</sup>.  $^1\text{H}$  NMR (500 MHz,  $\text{CDCl}_3$ ):  $\delta$  = 7.89 (d,  $J$  = 7.5 Hz, 1H), 7.56 (d,  $J$  = 7.0 Hz, 2H), 7.44 (d,  $J$  = 7.0 Hz, 3H), 7.30 - 7.22 (m, 8H).  $^{13}\text{C}$  NMR (125 MHz,  $\text{CDCl}_3$ ):  $\delta$  = 152.2, 142.9, 137.1, 136.8, 129.7 (d,  $J$  = 13.8 Hz) (2C), 129.3 (2C), 128.4, 128.1 (2C), 127.2 (2C), 123.2, 122.8, 119.7, 110.3

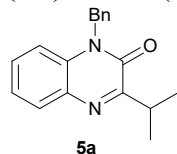

**1-benzyl-3-isopropylquinoxalin-2(1H)-one (5a).**  $^1\text{H}$  NMR (500 MHz,  $\text{CDCl}_3$ ):  $\delta$  = 7.85 (d,  $J$  = 7.0 Hz, 1H), 7.37 (t,  $J$  = 6.5 Hz, 2H), 7.31 - 7.21 (m, 7H), 5.50 (s, 2H), 3.72 - 3.67 (m, 1H), 1.36 (s, 3H), 1.35 (s, 3H).  $^{13}\text{C}$  NMR (125 MHz,  $\text{CDCl}_3$ ):  $\delta$  = 165.1, 154.5, 135.4, 133.0, 132.3, 129.9, 129.4, 128.9 (2C), 127.6, 126.8 (2C), 123.4, 114.2, 45.8, 31.2, 20.2 (2C).

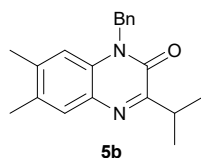

**1-benzyl-3-isopropyl-6,7-dimethylquinoxalin-2(1H)-one (5b).** <sup>1</sup>H NMR (500 MHz, CDCl<sub>3</sub>): δ = 7.62 (s, 1H), 7.30 (d, *J* = 6.5 Hz, 2H), 7.26 - 7.22 (m, 4H), 6.99 (s, 1H), 5.47 (s, 2H), 3.69 - 3.64 (m, 1H), 2.30 (s, 3H), 2.28 (s, 3H), 1.34 (s, 3H), 1.33 (s, 3H). <sup>13</sup>C NMR (125 MHz, CDCl<sub>3</sub>): δ = 163.9, 154.6, 139.0, 135.7, 132.3, 131.4, 130.3, 130.0, 128.8 (2C), 127.5, 126.8 (2C), 114.7, 45.7, 31.0, 20.5, 20.3 (2C), 19.0.

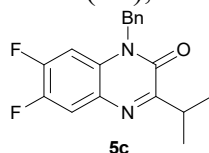

**1-benzyl-6,7-difluoro-3-isopropylquinoxalin-2(1H)-one (5c).** <sup>1</sup>H NMR (500 MHz, CDCl<sub>3</sub>): δ = 7.58 - 7.55 (m, 1H), 7.26 - 7.17 (m, 3H), 7.14 - 7.12 (m, 2H), 6.92 (dd, *J* = 11.0 Hz, 7.0 Hz, 1H), 5.34 (s, 2H), 3.60 - 3.55 (m, 1H), 1.25 (s, 3H), 1.24 (s, 3H). <sup>13</sup>C NMR (125 MHz, CDCl<sub>3</sub>): δ = 165.6, 154.1, 151.8 (d, *J* = 2.5 Hz, 1C), 129.1 (2C), 128.0, 126.8 (2C), 117.5 (d, *J* = 17.5 Hz, 1C), 102.9 (d, *J* = 22.5 Hz, 1C), 46.4, 31.3, 20.1 (2C).

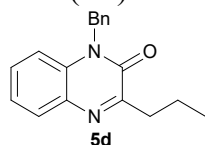

**1-benzyl-3-propylquinoxalin-2(1H)-one (5d)**<sup>16</sup>. <sup>1</sup>H NMR (500 MHz, CDCl<sub>3</sub>): δ = 7.84 (d, *J* = 7.5 Hz, 1H), 7.38 (t, *J* = 7.0 Hz, 1H), 7.31 - 7.23 (m, 7H), 5.50 (s, 2H), 2.99 (t, *J* = 7.0 Hz, 2H), 1.90 - 1.85 (m, 2H), 1.07 (t, *J* = 7.0 Hz, 3H). <sup>13</sup>C NMR (125 MHz, CDCl<sub>3</sub>): δ = 161.3, 155.0, 135.3, 133.0, 132.4, 129.7 (2C), 129.5, 128.9, 127.6, 126.8 (2C), 123.5, 114.3, 45.8, 36.2, 20.2, 14.1.

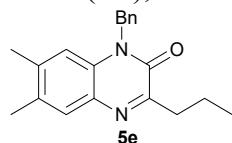

**1-benzyl-6,7-dimethyl-3-propylquinoxalin-2(1H)-one (5e).** <sup>1</sup>H NMR (500 MHz, CDCl<sub>3</sub>): δ = 7.59 (s, 1H), 7.29 (d, *J* = 5.5 Hz, 2H), 7.23 (s, 3H), 6.99 (s, 1H), 5.45 (s, 2H), 2.95 - 2.94 (m, 2H), 2.29 (s, 3H), 2.28 (s, 3H), 1.86 - 1.85 (m, 2H), 1.06 (t, *J* = 6.5 Hz, 3H). <sup>13</sup>C NMR (125 MHz, CDCl<sub>3</sub>): δ = 159.9, 155.0, 139.0, 135.6, 132.4, 131.3, 130.4, 129.8, 128.8 (2C), 127.5, 126.8 (2C), 114.5, 45.6, 36.1, 20.4, 20.2, 19.0, 14.0.

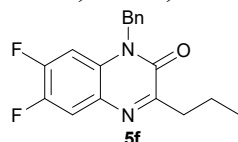

**1-benzyl-6,7-difluoro-3-propylquinoxalin-2(1H)-one (5f).** <sup>1</sup>H NMR (500 MHz, CDCl<sub>3</sub>): δ = 7.57 - 7.53 (m, 1H), 7.25 - 7.18 (m, 3H), 7.14 - 7.13 (m, 2H), 6.95 - 6.91 (m, 1H), 5.34 (s, 2H), 2.88 (t, *J* = 7.0 Hz, 2H), 1.79 - 1.75 (m, 2H), 0.99 (t, *J* = 6.5 Hz, 3H). <sup>13</sup>C NMR (125 MHz, CDCl<sub>3</sub>): δ = 161.8 (d, *J* = 2.5 Hz, 1C), 154.6, 151.8 (d, *J* = 13.8 Hz, 1C), 147.6 (d, *J* = 13.8 Hz, 1C), 134.5, 129.5 (d, *J* = 10.0 Hz, 1C), 129.3 (d, *J* = 11.3 Hz, 1C), 129.1 (2C), 128.0, 126.8 (2C), 117.3 (d, *J* = 17.5 Hz, 1C), 103.0 (d, *J* = 22.5 Hz, 1C), 46.4, 36.1, 19.9, 14.0.

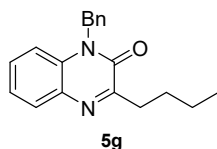

**1-benzyl-3-butylquinoxalin-2(1H)-one (5g)**<sup>17</sup>. <sup>1</sup>H NMR (500 MHz, CDCl<sub>3</sub>): δ = 7.84 (dd, *J* = 1.5 Hz, 8.0, 1H), 7.40 - 7.37 (m, 1H), 7.33 - 7.22 (m, 7H), 5.50 (s, 2H), 3.03 - 2.99 (m, 2H), 1.85 - 1.79 (m, 2H), 1.54 - 1.47 (m, 2H), 0.99 (t, *J* = 7.5 Hz, 3H). <sup>13</sup>C NMR (125MHz, CDCl<sub>3</sub>): δ = 161.5, 155.0, 135.3, 133.0, 132.4, 129.7, 129.4, 128.9, 127.6, 126.8, 123.5, 114.3, 45.8, 34.1, 29.0, 22.7, 14.0.

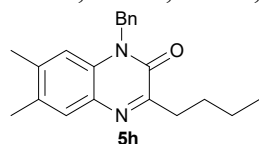

**1-benzyl-3-butyl-6,7-dimethylquinoxalin-2(1H)-one**. <sup>1</sup>H NMR (500 MHz, CDCl<sub>3</sub>): δ = 7.59 (s, 1H), 7.28 (d, *J* = 5.5 Hz, 2H), 7.23 (s, 3H), 6.99 (s, 1H), 5.45 (s, 2H), 2.97 (d, *J* = 6.0 Hz, 2H), 2.27 (s, 6H), 1.81 - 1.80 (m, 2H), 1.49 - 1.48 (m, 2H), 0.98 - 0.97 (m, 3H). <sup>13</sup>C NMR (125 MHz, CDCl<sub>3</sub>): δ = 160.0, 154.9, 139.0, 135.5, 132.3, 131.3, 130.3, 129.8, 128.7 (2C), 127.4, 126.8 (2C), 114.7, 45.6, 33.9, 28.9, 22.7, 20.4, 19.0, 13.9.

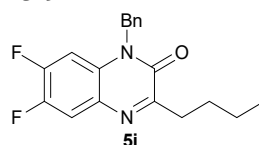

**1-benzyl-3-butyl-6,7-difluoroquinoxalin-2(1H)-one**. <sup>1</sup>H NMR (500 MHz, CDCl<sub>3</sub>): δ = 7.57 - 7.54 (m, 1H), 7.26 - 7.21 (m, 3H), 7.14 - 7.13 (m, 2H), 6.95 - 6.92 (m, 1H), 5.34 (s, 2H), 2.90 (t, *J* = 7.0 Hz, 2H), 1.72 (t, *J* = 6.5 Hz, 2H), 1.41 (q, *J* = 13.5 Hz, 7.0 Hz, 2H), 0.91 (t, *J* = 7.0 Hz, 3H). <sup>13</sup>C NMR (125 MHz, CDCl<sub>3</sub>): δ = 162.0 (d, *J* = 3.8 Hz, 1C), 154.5, 149.8 (d, *J* = 13.8 Hz, 1C), 145.6 (d, *J* = 13.8 Hz, 1C), 134.5, 129.5 (d, *J* = 8.8 Hz, 1C), 129.3 (d, *J* = 8.8 Hz, 1C), 129.1 (2C), 128.0, 126.8 (2C), 117.4 (d, *J* = 18.8 Hz, 1C), 103.0 (d, *J* = 22.5 Hz, 1C), 46.4, 33.9, 28.7, 22.7, 13.9.

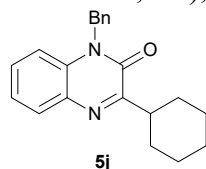

**1-benzyl-3-cyclohexylquinoxalin-2(1H)-one (5j)**<sup>14</sup>: <sup>1</sup>H NMR (500 MHz, CDCl<sub>3</sub>): δ = 7.84 (d, *J* = 7.5 Hz, 1H), 7.37 (t, *J* = 7.0 Hz, 1H), 7.31 - 7.22 (m, 7H), 5.49 (s, 2H), 3.40 (q, *J* = 19.5 Hz, 11.5 Hz, 1H), 2.01 (d, *J* = 11.5 Hz, 2H), 1.88 (d, *J* = 12.5 Hz, 2H), 1.78 (d, *J* = 12.5 Hz, 1H), 1.60 (t, *J* = 16.0 Hz, 2H), 1.48 (q, *J* = 25.5 Hz, 12.5 Hz, 2H), 1.36 - 1.29 (m, 1H). <sup>13</sup>C NMR (125 MHz, CDCl<sub>3</sub>): δ = 164.4, 154.6, 135.5, 133.2, 132.2, 129.9, 129.3, 128.9 (2C), 127.6, 126.9 (2C), 123.4, 114.2, 45.9, 40.8, 30.6 (2C), 26.3 (2C), 26.2.

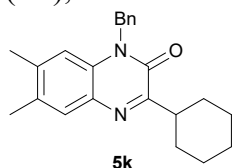

**1-benzyl-3-cyclohexyl-6,7-dimethylquinoxalin-2(1H)-one (5k)**<sup>15</sup>. <sup>1</sup>H NMR (500 MHz, CDCl<sub>3</sub>): δ = 7.60 (s, 1H), 7.28 (d, *J* = 6.0 Hz, 2H), 7.23 (d, *J* = 5.5 Hz, 3H), 6.99 (s, 1H), 5.45 (s, 2H), 3.37 (t, *J* = 11.0 Hz, 1H), 2.27 (s, 3H), 2.26 (s, 3H), 2.0 (d, *J* =

11.0 Hz, 2H), 1.87(d,  $J = 10.5$  Hz, 2H), 1.76 (d,  $J = 11.5$  Hz, 1H), 1.59 (dd,  $J = 24.0$  Hz, 12.0 Hz, 2H), 1.47(q,  $J = 25.0$  Hz, 12.5 Hz, 2H), 1.35 - 1.30 (m, 1H).  $^{13}\text{C}$  NMR (125 MHz,  $\text{CDCl}_3$ ):  $\delta = 163.1, 154.5, 138.9, 135.7, 132.2, 131.5, 130.1, 129.9, 128.8$  (2C), 127.4, 126.8 (2C), 114.6, 45.7, 40.6, 30.6 (2C), 26.3, 26.1, 20.4, 19.0.

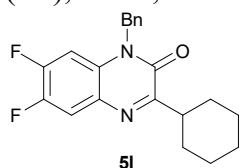

**1-benzyl-3-cyclohexyl-6,7-difluoroquinoxalin-2(1H)-one (5l).**  $^1\text{H}$  NMR (500 MHz,  $\text{CDCl}_3$ ):  $\delta = 7.63$  (t,  $J = 9.5$  Hz, 1H), 7.35 - 7.28 (m, 3H), 7.22 - 7.21 (m, 2H), 7.01 (dd,  $J = 11.0$  Hz, 7.0 Hz, 1H), 5.41 (s, 2H), 3.37 (dd,  $J = 11.0$  Hz, 3.0 Hz, 1H), 2.00 - 1.99 (m, 2H), 1.89 - 1.87 (m, 2H), 1.79 - 1.77 (m, 1H), 1.59 - 1.43 (m, 4H), 1.35 - 1.27 (m, 1H).  $^{13}\text{C}$  NMR (125 MHz,  $\text{CDCl}_3$ ):  $\delta = 164.9$  (d,  $J = 12.5$  Hz, 1C), 154.1, 151.7 (d,  $J = 14.3$  Hz, 1C), 147.5 (d,  $J = 13.8$  Hz, 1C), 134.6, 129.4 (d,  $J = 7.1$  Hz, 1C), 129.2 (d,  $J = 8.3$  Hz, 1C), 129.1 (2C), 127.9, 126.8 (2C), 117.4 (d,  $J = 17.5$  Hz, 1C), 102.7 (d,  $J = 23.0$  Hz, 1C), 46.4, 40.8, 30.5 (2C), 26.2 (2C), 26.1.

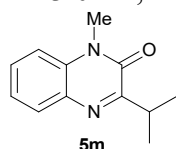

**3-isopropyl-1-methylquinoxalin-2(1H)-one (5m)**<sup>16</sup>.  $^1\text{H}$  NMR (500 MHz,  $\text{CDCl}_3$ ):  $\delta = 7.83$  (d,  $J = 7.5$  Hz, 1H), 7.49 (t,  $J = 7.5$  Hz, 1H), 7.31 (t,  $J = 7.0$  Hz, 1H), 7.27 (d,  $J = 8.0$  Hz, 1H), 3.69 (s, 3H), 3.66 - 3.60 (m, 1H), 1.33 (s, 3H), 1.31 (s, 3H).  $^{13}\text{C}$  NMR (125 MHz,  $\text{CDCl}_3$ ):  $\delta = 164.8, 154.4, 132.8, 132.6, 129.7, 129.3, 123.3, 113.3, 31.1, 28.9, 20.1$  (2c).

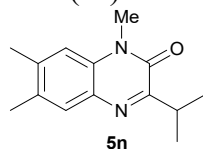

**3-isopropyl-1,6,7-trimethylquinoxalin-2(1H)-one (5n).**  $^1\text{H}$  NMR (500 MHz,  $\text{CDCl}_3$ )  $\delta = 7.60$  (s, 1H), 7.03 (s, 1H), 3.66 (s, 3H), 3.63 - 3.53 (m, 1H), 2.40 (s, 3H), 2.33 (s, 3H), 1.31 (s, 3H), 1.30 (s, 3H).  $^{13}\text{C}$  NMR (125 MHz,  $\text{CDCl}_3$ ):  $\delta = 163.6, 154.5, 138.9, 132.1, 131.1, 130.9, 129.8, 114.0, 31.0, 28.8, 20.4, 20.2$  (2c), 19.0.

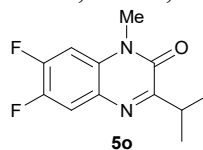

**6,7-difluoro-3-isopropyl-1-methylquinoxalin-2(1H)-one (5o).**  $^1\text{H}$  NMR (500 MHz,  $\text{CDCl}_3$ ):  $\delta = 7.65$  (t,  $J = 9.5$  Hz, 1H), 7.09 (dd,  $J = 11.0$  Hz, 7.0 Hz, 1H), 3.61 - 3.56 (m, 1H), 1.29 (s, 3H), 1.28 (s, 3H).  $^{13}\text{C}$  NMR (125 MHz,  $\text{CDCl}_3$ ):  $\delta = 165.5$  (d,  $J = 3.8$  Hz, 1C), 154.0, 151.9 (d,  $J = 15.0$  Hz, 1C), 147.5 (d,  $J = 13.8$  Hz, 1C), 130.1 (d,  $J = 8.8$  Hz, 1C), 129.0 (d,  $J = 8.8$  Hz, 1C), 117.4 (d,  $J = 17.5$  Hz, 1C), 102.1 (d,  $J = 23.8$  Hz, 1C), 31.2, 29.5, 20.0 (2C).

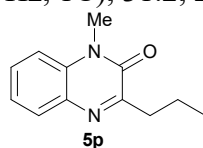

**1-methyl-3-propylquinoxalin-2(1H)-one (5p)**<sup>16</sup>.  $^1\text{H}$  NMR (500 MHz,  $\text{CDCl}_3$ ):  $\delta =$

7.81 (d,  $J = 7.5$  Hz, 1H), 7.50 (t,  $J = 7.0$  Hz, 1H), 7.31 (t,  $J = 7.0$  Hz, 1H), 7.26 (d,  $J = 8.5$  Hz, 1H), 3.68 (s, 3H), 2.91 (t,  $J = 7.5$  Hz, 2H), 1.83 (q,  $J = 14.5$  Hz, 7.0 Hz, 2H), 1.05 (t,  $J = 7.0$  Hz, 3H).  $^{13}\text{C}$  NMR (125 MHz,  $\text{CDCl}_3$ ):  $\delta = 160.1, 154.7, 133.9, 132.5, 129.4, 129.3, 123.3, 113.4, 36.1, 28.8, 20.0, 13.9$ .

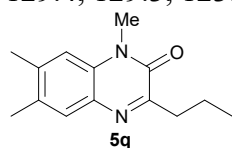

**1,6,7-trimethyl-3-propylquinoxalin-2(1H)-one (5q)**:  $^1\text{H}$  NMR (500 MHz,  $\text{CDCl}_3$ ):  $\delta = 7.57$  (s, 1H), 7.03 (s, 1H), 3.66 (s, 3H), 2.89 (t,  $J = 7.5$  Hz, 2H), 2.40 (s, 3H), 2.33 (s, 3H), 1.81 (q,  $J = 15.0$  Hz, 7.5 Hz, 2H), 1.04 (t,  $J = 7.5$  Hz, 3H).  $^{13}\text{C}$  NMR (125 MHz,  $\text{CDCl}_3$ )  $\delta = 159.7, 154.9, 139.0, 132.2, 131.0, 131.0, 129.64, 114.0, 77.3, 77.0, 76.7, 36.1, 28.8, 20.4, 20.2, 19.1, 14.0$ ,

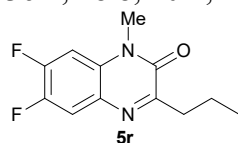

**6,7-difluoro-1-methyl-3-propylquinoxalin-2(1H)-one (5r)**.  $^1\text{H}$  NMR (500 MHz,  $\text{CDCl}_3$ ):  $\delta = 7.62$  (dd,  $J = 9.5$  Hz, 8.5 Hz, 1H), 7.10 (dd,  $J = 11.0$  Hz, 7.0 Hz, 1H), 3.66 (s, 3H), 2.88 (t,  $J = 7.0$  Hz, 2H), 1.82 - 1.78 (m, 2H), 1.04 (t,  $J = 7.0$  Hz, 3H).  $^{13}\text{C}$  NMR (125 MHz,  $\text{CDCl}_3$ )  $\delta = 161.6$  (d,  $J = 3.8$  Hz, 1C), 154.4, 151.8 (d,  $J = 13.8$  Hz, 1C), 147.4 (d,  $J = 13.8$  Hz, 1C), 117.2 (d,  $J = 17.5$  Hz, 1C), 102.1 (d,  $J = 22.5$  Hz, 1C), 36.0, 29.4, 19.8, 13.9.

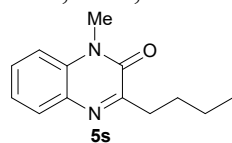

**3-butyl-1-methylquinoxalin-2(1H)-one (5s)**<sup>17</sup>.  $^1\text{H}$  NMR (500 MHz,  $\text{CDCl}_3$ ):  $\delta = 7.81$  (d,  $J = 7.0$  Hz, 1H), 7.50 (t,  $J = 7.0$  Hz, 1H), 7.33 - 7.26 (m, 2H), 3.68 (s, 3H), 2.94 (t,  $J = 7.5$  Hz, 2H), 1.77 (t,  $J = 6.0$  Hz, 2H), 1.47 (q,  $J = 14.0$  Hz, 7.0 Hz, 2H), 0.97 (t,  $J = 7.0$  Hz, 3H).  $^{13}\text{C}$  NMR (125 MHz,  $\text{CDCl}_3$ ):  $\delta = 161.2, 154.7, 132.9, 132.6, 129.4, 129.3, 123.3, 113.4, 33.9, 28.9, 28.8, 22.6$  (2C), 13.8.

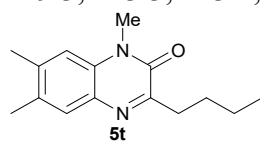

**3-butyl-1,6,7-trimethylquinoxalin-2(1H)-one (5t)**<sup>17</sup>.  $^1\text{H}$  NMR (500 MHz,  $\text{CDCl}_3$ ):  $\delta = 7.56$  (s, 1H), 7.02 (s, 1H), 3.65 (s, 3H), 2.91 (t,  $J = 7.5$  Hz, 2H), 2.39 (s, 3H), 2.33 (s, 3H), 1.76 (t,  $J = 7.0$  Hz, 2H), 1.46 (q,  $J = 14.5$  Hz, 7.0 Hz, 2H), 0.97 (t,  $J = 7.0$  Hz, 3H)

$^{13}\text{C}$  NMR (125 MHz,  $\text{CDCl}_3$ ):  $\delta = 159.9, 154.8, 139.0, 132.2, 131.0, 130.9, 129.6, 114.0, 33.9, 28.9, 28.8, 22.6, 20.3, 19.0, 13.9$ .

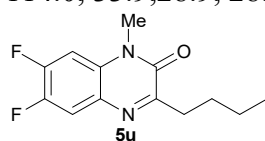

**3-butyl-6,7-difluoro-1-methylquinoxalin-2(1H)-one (5u)**<sup>17</sup>.  $^1\text{H}$  NMR (500 MHz,  $\text{CDCl}_3$ ):  $\delta = 7.63$  (dd,  $J = 10.0$  Hz, 8.5 Hz, 1H), 7.09 (dd,  $J = 11.5$  Hz, 7.0 Hz, 1H), 3.65 (s, 3H), 2.91 (t,  $J = 7.5$  Hz, 2H), 1.78 - 1.72 (m, 2H), 1.46 (q,  $J = 15$  Hz, 7.5 Hz, 2H), 0.97 (t,  $J = 7.5$  Hz, 3H).  $^{13}\text{C}$  NMR (125 MHz,  $\text{CDCl}_3$ ):  $\delta = 161.8$  (d,  $J = 3.8$  Hz,

1C), 154.4, 151.8 (d,  $J = 13.8$  Hz, 1C), 147.5 (d,  $J = 13.8$  Hz, 1C), 130.1 (d,  $J = 8.8$  Hz, 1C), 128.9 (d,  $J = 6.3$  Hz, 1C), 117.2 (d,  $J = 16.3$  Hz, 1C), 102.1 (d,  $J = 22.5$  Hz, 1C), 33.9, 29.5, 28.6, 22.6, 13.9.

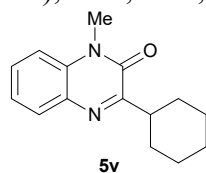

5v

**3-cyclohexyl-1-methylquinoxalin-2(1H)-one (5v)**<sup>15</sup>. <sup>1</sup>H NMR (500 MHz, CDCl<sub>3</sub>):  $\delta = 7.84$  (d,  $J = 8.0$  Hz, 1H), 7.51 (t,  $J = 7.5$  Hz, 1H), 7.32 (t,  $J = 7.0$  Hz, 1H), 7.29 - 7.26 (m, 1H), 3.70 (s, 3H), 3.36 - 3.32 (m, 1H), 1.96 (d,  $J = 11.5$  Hz, 2H), 1.87 (d,  $J = 12.0$  Hz, 2H), 1.77 (d,  $J = 12.0$  Hz, 1H), 1.57 (dd,  $J = 22.0$  Hz, 9.5 Hz, 2H), 1.47 (dd,  $J = 25.0$  Hz, 12.5 Hz, 2H), 1.35 - 1.30 (m, 1H). <sup>13</sup>C NMR (125 MHz, CDCl<sub>3</sub>):  $\delta = 164.3$ , 154.6, 132.9, 132.8, 129.8, 129.4, 123.4, 113.4, 40.8, 30.5(2C), 29.0, 26.3(2C), 26.1.

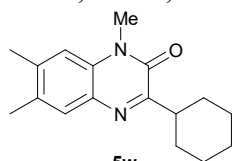

5w

**3-cyclohexyl-1,6,7-trimethylquinoxalin-2(1H)-one (5w)**<sup>18</sup>. <sup>1</sup>H NMR (500 MHz, CDCl<sub>3</sub>):  $\delta = 7.60$  (s, 1H), 7.03 (s, 1H), 3.66 (s, 3H), 3.34 - 3.30 (m, 1H), 2.40 (s, 3H), 2.33 (s, 3H), 1.94 (d,  $J = 11.0$  Hz, 2H), 1.86 (d,  $J = 10.5$  Hz, 2H), 1.76 (d,  $J = 12.0$  Hz, 1H), 1.59 - 1.45 (m, 4H), 1.34 - 1.26 (m, 4H). <sup>13</sup>C NMR (125 MHz, CDCl<sub>3</sub>):  $\delta = 163.0$ , 154.6, 138.9, 132.1, 131.2, 130.8, 129.8, 114.0, 40.6, 30.5 (2C), 28.9, 26.3 (2C), 26.1, 20.4, 19.0.

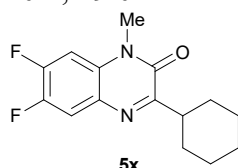

5x

**3-cyclohexyl-6,7-difluoro-1-methylquinoxalin-2(1H)-one (5x)**<sup>14</sup>. <sup>1</sup>H NMR (500 MHz, CDCl<sub>3</sub>):  $\delta = 7.64$  (q,  $J = 10.0$  Hz, 8.5 Hz, 1H), 7.08 (q,  $J = 11.0$  Hz, 7.0 Hz, 1H), 3.65 (s, 3H), 3.32 - 3.28 (m, 1H), 1.93 (d,  $J = 10.0$  Hz, 2H), 1.86 (d,  $J = 11.5$  Hz, 2H), 1.76 (d,  $J = 12.5$  Hz, 1H), 1.55 - 1.41 (m, 4H), 1.33 - 1.26 (m, 1H). <sup>13</sup>C NMR (125 MHz, CDCl<sub>3</sub>):  $\delta = 164.8$  (d,  $J = 2.5$  Hz), 154.0, 151.8 (d,  $J = 15.0$  Hz), 149.8 (d,  $J = 13.8$  Hz), 147.4 (d,  $J = 13.8$  Hz), 145.5 (d,  $J = 13.8$  Hz), 129.9 (d,  $J = 8.8$  Hz), 129.1 (d,  $J = 6.3$  Hz), 117.3 (d,  $J = 17.5$  Hz), 102.0 (d,  $J = 22.5$  Hz), 40.7, 30.4 (2C), 29.5, 26.2 (2C), 26.1.

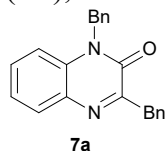

7a

**1,3-dibenzylquinoxalin-2(1H)-one (7a)**<sup>19</sup>. <sup>1</sup>H NMR (500 MHz, CDCl<sub>3</sub>):  $\delta = 7.84$  (d,  $J = 7.0$  Hz, 1H), 7.49 (d,  $J = 6.5$  Hz, 2H), 7.37 - 7.18 (m, 11H), 5.43 (s, 2H), 4.32 (s, 2H). <sup>13</sup>C NMR (125 MHz, CDCl<sub>3</sub>):  $\delta = 159.4$ , 154.8, 137.0, 135.2, 133.0, 132.6, 130.0, 129.8, 129.5 (2C), 128.5 (2C), 128.4 (2C), 127.6, 126.8 (2C), 126.5, 123.5, 114.3, 45.9, 40.7.

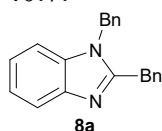

8a



**1,2-dibenzyl-1H-benzo[d]imidazole (8a)**<sup>6</sup>. <sup>1</sup>H NMR (500 MHz, CDCl<sub>3</sub>): δ = 7.81 (d, *J* = 7.5 Hz, 1H), 7.24 - 7.18 (m, 11H), 6.92 (s, 2H), 5.17 (s, 2H), 4.25 (s, 2H). <sup>13</sup>C NMR (125 MHz, CDCl<sub>3</sub>): δ = 153.3, 142.6, 136.0, 135.7, 128.8 (2C), 128.7 (2C), 128.4 (2C), 127.8, 126.9, 126.1 (2C), 122.5, 122.1, 119.6, 109.6, 47.0, 34.5.

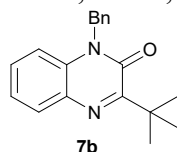

**1-benzyl-3-(tert-butyl)quinoxalin-2(1H)-one (7b)**<sup>16</sup>. <sup>1</sup>H NMR (500 MHz, CDCl<sub>3</sub>): δ = 7.82 (d, *J* = 7.5 Hz, 1H), 7.34 - 7.16 (m, 8H), 5.46 (s, 2H), 1.54 (s, 9H). <sup>13</sup>C NMR (125 MHz, CDCl<sub>3</sub>): δ = 165.3, 153.6, 135.5, 132.6, 132.3, 130.1, 129.4, 128.8 (2C), 127.4, 126.6 (2C), 123.1, 113.9, 45.4, 39.5, 27.9 (3C).

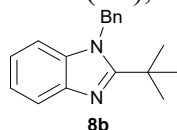

**1-benzyl-2-(tert-butyl)-1H-benzo[d]imidazole (8b)**<sup>10</sup>. <sup>1</sup>H NMR (500 MHz, CDCl<sub>3</sub>) δ = 7.80 (d, *J* = 7.5 Hz, 1H), 7.27 - 7.20 (m, 4H), 7.11 (t, *J* = 7.0 Hz, 1H), 6.97 (q, *J* = 19.5 Hz, 8.0 Hz, 3H), 5.60 (s, 2H), 1.52 (s, 9H). <sup>13</sup>C NMR (125 MHz, CDCl<sub>3</sub>): δ = 161.1, 141.7, 136.6, 136.2, 128.8 (2C), 127.4, 125.6 (2C), 122.4, 121.9, 119.5, 109.9, 48.6, 34.1, 29.8 (3C).

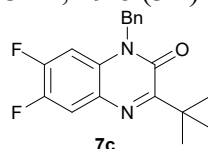

**1-benzyl-3-(tert-butyl)quinoxalin-2(1H)-one (7c)**. <sup>1</sup>H NMR (500 MHz, CDCl<sub>3</sub>): δ = 7.62 (d, *J* = 9.0 Hz, 1H), 7.32 - 7.25 (m, 3H), 7.19 (d, *J* = 7.0 Hz, 2H), 6.97 (dd, *J* = 11.0 Hz, 7.0 Hz, 1H), 5.40 (s, 2H), 1.51 (s, 9H). <sup>13</sup>C NMR (125 MHz, CDCl<sub>3</sub>): δ = 160.0 (d, *J* = 2.5 Hz, 1C), 153.2, 151.8 (d, *J* = 15.0 Hz, 1C), 147.4 (d, *J* = 13.8 Hz, 1C), 134.7, 129.7 (d, *J* = 7.5 Hz, 1C), 129.0 (2C), 128.6 (d, *J* = 7.5 Hz, 1C), 127.8, 126.6 (2C), 117.6 (d, *J* = 17.5 Hz, 1C), 102.5 (d, *J* = 22.5 Hz, 1C), 46.0, 39.6, 27.8 (3C).

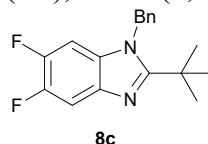

**1-benzyl-2-(tert-butyl)-5,6-difluoro-1H-benzo[d]imidazole (8c)**. <sup>1</sup>H NMR (500 MHz, CDCl<sub>3</sub>): δ = 7.54 (dd, *J* = 10.0 Hz, 7.0 Hz, 1H), 7.31 - 7.27 (m, 3H), 6.94 (d, *J* = 6.0 Hz, 2H), 6.74 (dd, *J* = 9.5 Hz, 7.0 Hz, 1H), 5.55 (s, 2H), 1.51 (s, 9H). <sup>13</sup>C NMR (125 MHz, CDCl<sub>3</sub>): δ = 162.7, 148.6 (dd, *J* = 28.8 Hz, 16.3 Hz, 1C), 146.7 (dd, *J* = 26.3 Hz, 16.3 Hz, 1C), 136.8 (d, *J* = 10.0 Hz, 1C), 135.3, 131.8 (d, *J* = 10.0 Hz, 1C), 129.0 (2C), 127.8, 125.6 (2C), 106.9 (d, *J* = 20.0 Hz, 1C), 98.1 (d, *J* = 23.8 Hz, 1C), 49.0, 34.2, 29.6 (3C).

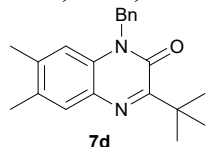

**1-benzyl-3-(tert-butyl)-6,7-dimethylquinoxalin-2(1H)-one (7d)**. <sup>1</sup>H NMR (500 MHz, CDCl<sub>3</sub>): δ = 7.59 (s, 1H), 7.28 - 7.26 (m, 2H), 7.20 (s, 3H), 6.95 (s, 1H), 5.43 (s, 2H), 2.26 (s, 3H), 2.25 (s, 3H), 1.52 (s, 9H). <sup>13</sup>C NMR (125 MHz, CDCl<sub>3</sub>): δ = 164.1,

153.6, 139.0, 135.8, 132.0, 130.7, 130.6, 130.2, 128.7 (2C), 127.3, 126.6 (2C), 114.4, 77.3, 77.0, 76.7, 45.3, 39.3, 28.0 (3C), 20.4, 19.0.

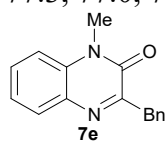

**3-benzyl-1-methylquinoxalin-2(1H)-one (7e)**<sup>19</sup>. <sup>1</sup>H NMR (500 MHz, CDCl<sub>3</sub>)  $\delta$  = 7.84 (d,  $J$  = 7.5 Hz, 1H), 7.50 - 7.46 (m, 3H), 7.33 - 7.19 (m, 5H), 4.26 (s, 2H), 3.64 (s, 3H). <sup>13</sup>C NMR (125 MHz, CDCl<sub>3</sub>):  $\delta$  = 159.3, 154.7, 137.0, 133.3, 132.7, 129.9, 129.8, 129.5(2C), 128.4(2C), 126.5, 123.5, 113.5, 40.7, 29.1.

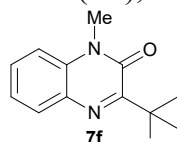

**3-(tert-butyl)-1-methylquinoxalin-2(1H)-one (7f)**<sup>16</sup>. <sup>1</sup>H NMR (500 MHz, CDCl<sub>3</sub>):  $\delta$  = 7.80 (d,  $J$  = 7.5 Hz, 1H), 7.45 (t,  $J$  = 14.5 Hz, 1H), 7.26 (t,  $J$  = 7.9 Hz, 1H), 7.20 (d,  $J$  = 8.0 Hz, 1H), 3.63 (s, 3H), 1.50 (s, 9H). <sup>13</sup>C NMR (125 MHz, CDCl<sub>3</sub>):  $\delta$  = 165.0, 153.5, 133.1, 131.9, 129.9, 129.3, 122.9, 113.0, 39.3, 28.5, 27.7 (3C).

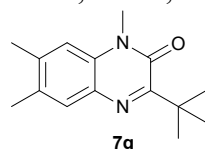

**3-(tert-butyl)-1,6,7-trimethylquinoxalin-2(1H)-one (7g)**<sup>18</sup>. <sup>1</sup>H NMR (500 MHz, CDCl<sub>3</sub>):  $\delta$  = 7.58 (s, 1H), 7.01 (s, 1H), 3.63 (s, 3H), 2.39 (s, 3H), 2.32 (s, 3H), 1.48 (s, 3H). <sup>13</sup>C NMR (125 MHz, CDCl<sub>3</sub>):  $\delta$  = 163.9, 153.7, 133.1, 139.0, 131.9, 131.2, 130.5, 130.1, 113.8, 39.2, 28.6, 27.9 (3C), 20.4, 19.0.

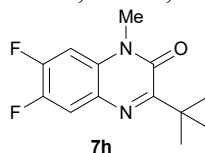

**33-(tert-butyl)-6,7-difluoro-1-methylquinoxalin-2(1H)-one (7h)**<sup>18</sup>. <sup>1</sup>H NMR (500 MHz, CDCl<sub>3</sub>):  $\delta$  = 7.63 (t,  $J$  = 8.5 Hz, 1H), 7.07 (dd,  $J$  = 11.0 Hz, 7.5 Hz, 1H), 3.63 (s, 3H), 1.46 (s, 9H). <sup>13</sup>C NMR (125 MHz, CDCl<sub>3</sub>):  $\delta$  = 165.9 (d,  $J$  = 3.8 Hz, 1C), 153.2, 151.9 (d,  $J$  = 13.8 Hz, 1C), 147.3 (d,  $J$  = 13.8 Hz), 130.5 (d,  $J$  = 7.5 Hz), 128.4 (d,  $J$  = 7.5 Hz, 1C), 117.6 (d,  $J$  = 17.5 Hz, 1C), 101.8 (d,  $J$  = 22.5 Hz), 39.5, 29.2, 27.7 (3C).

# Copies of the $^1\text{H}$ and $^{13}\text{C}$ NMR Spectra

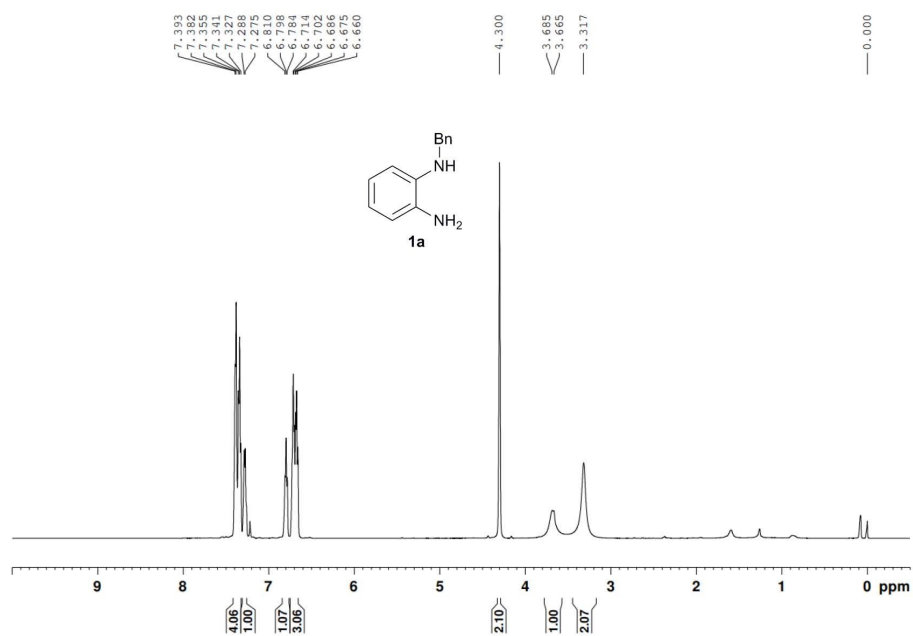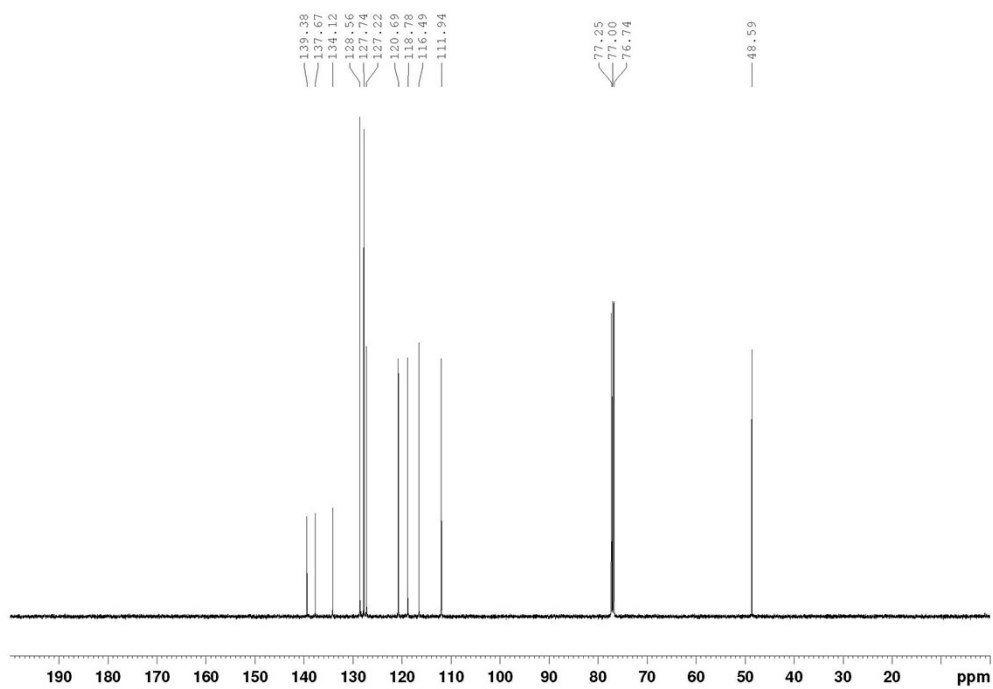

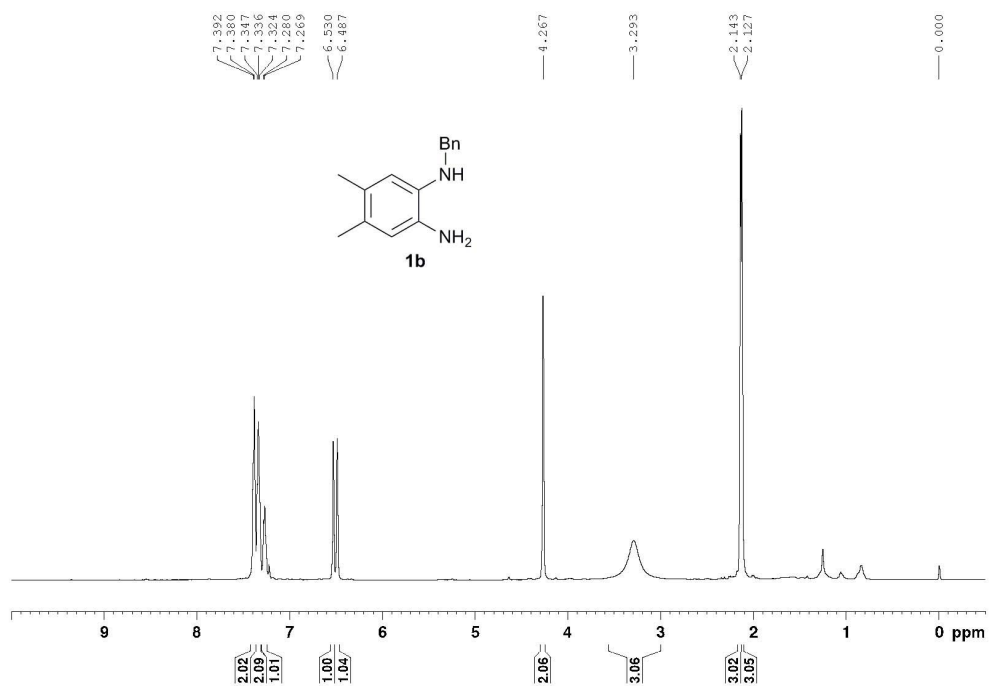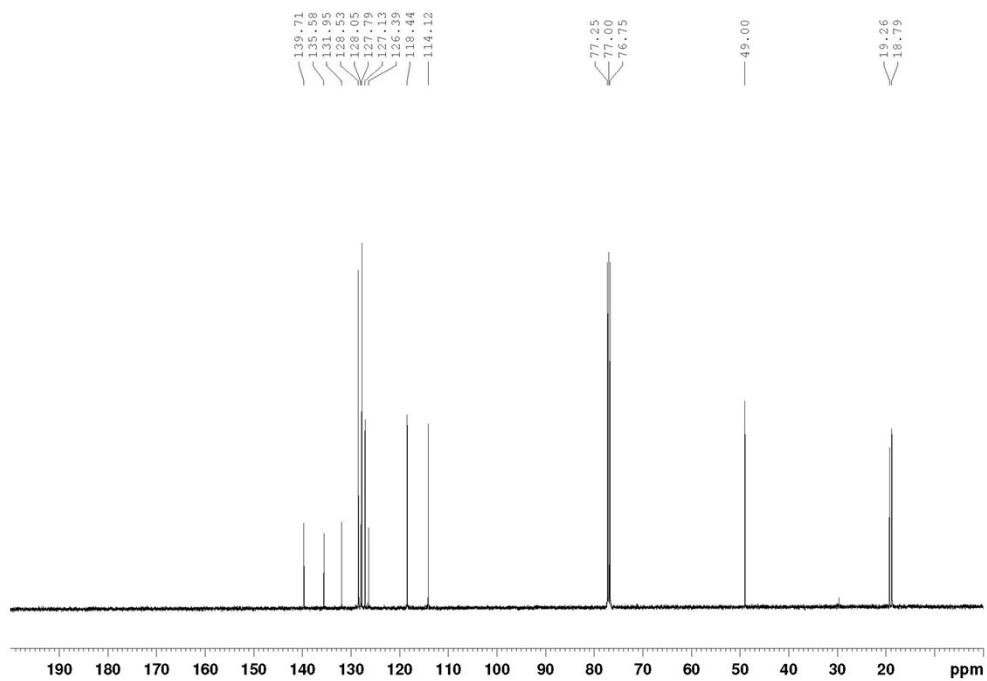

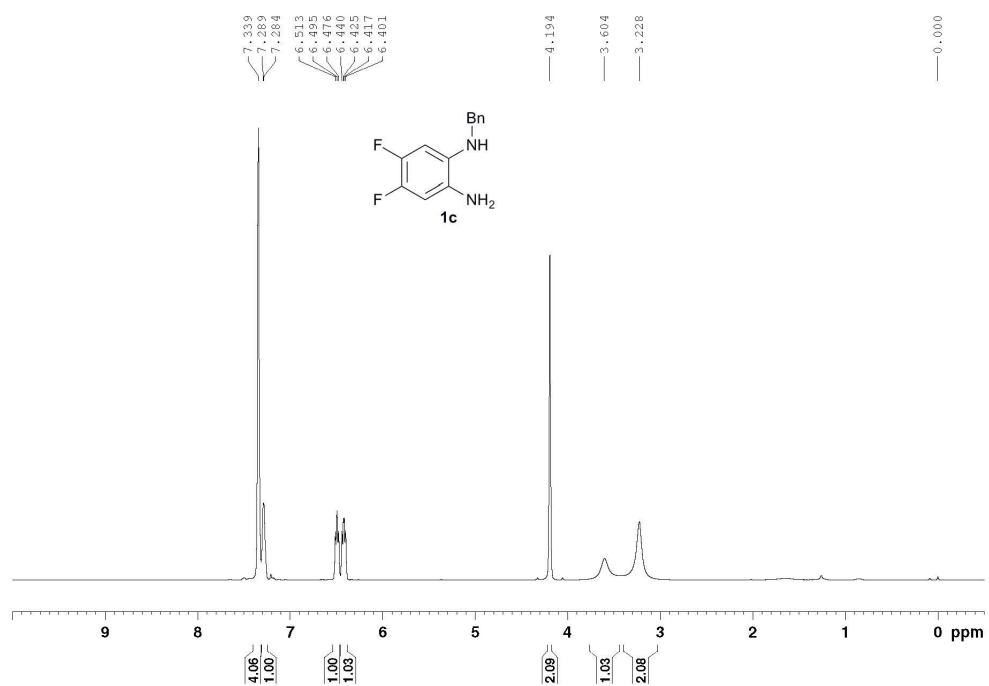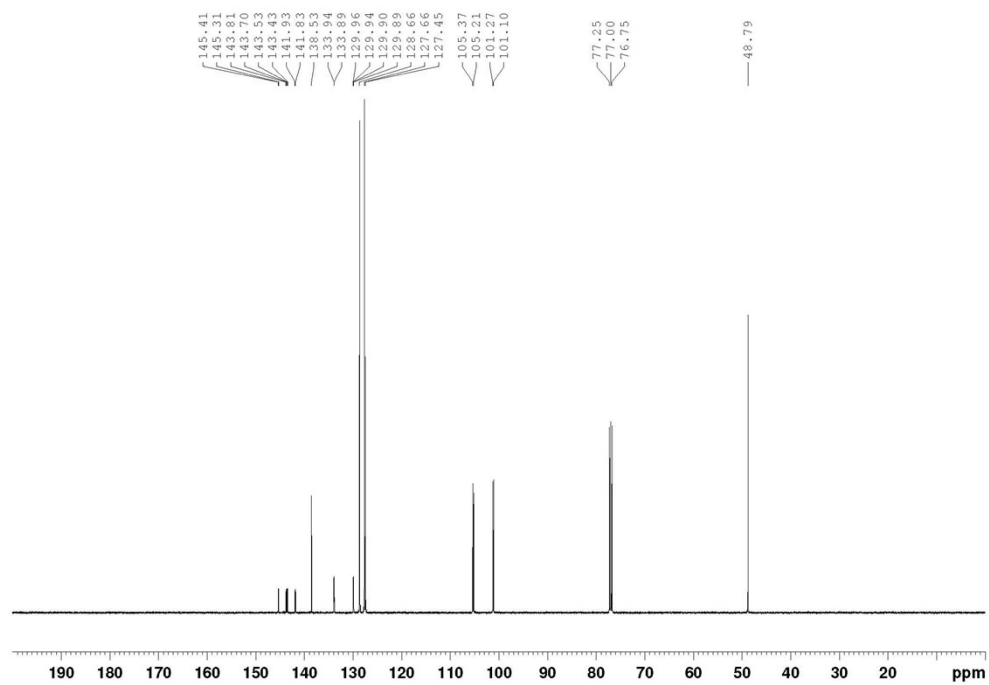

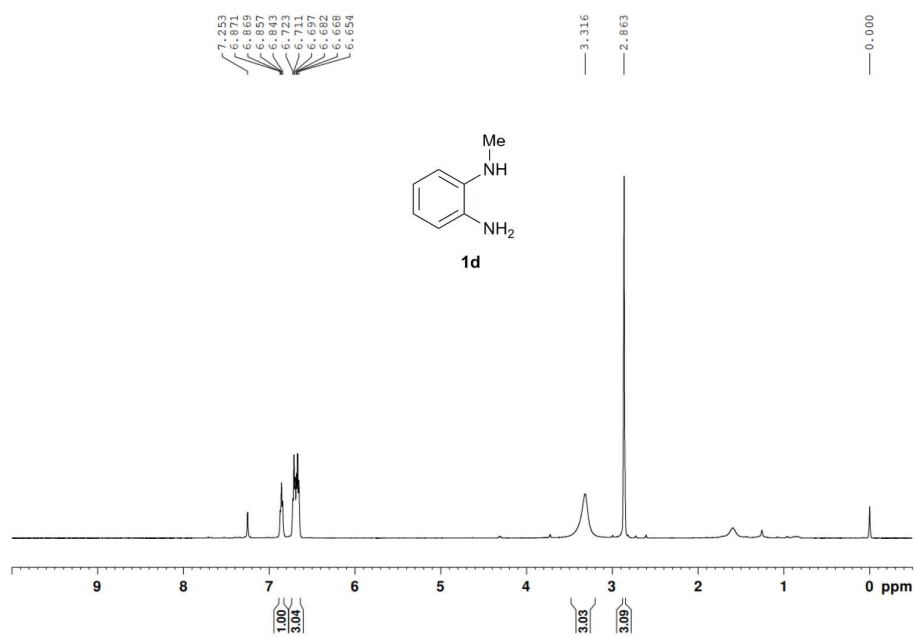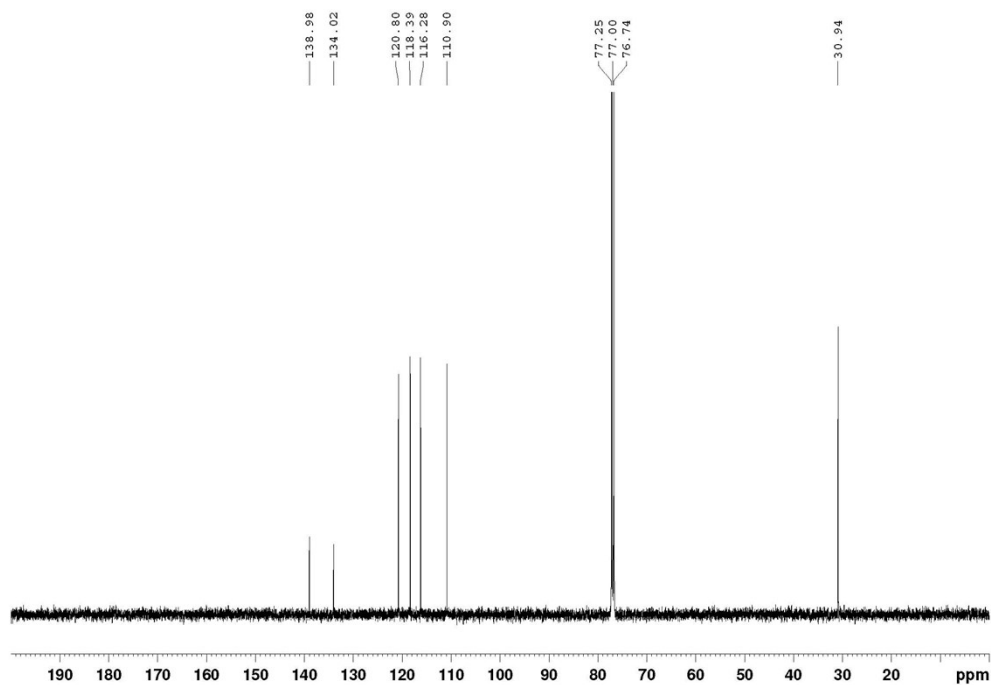

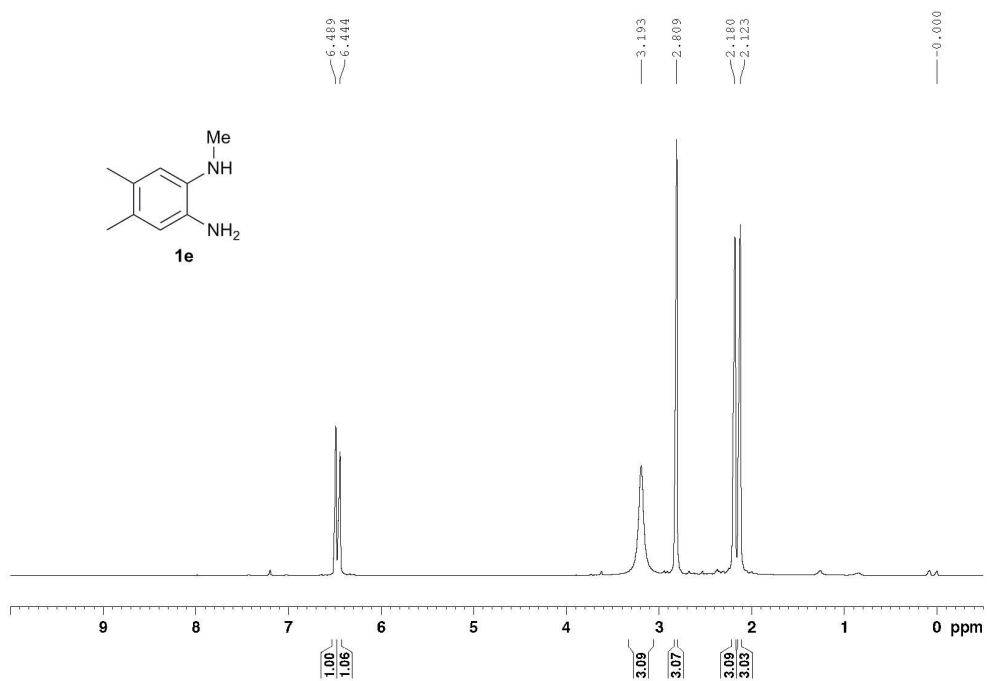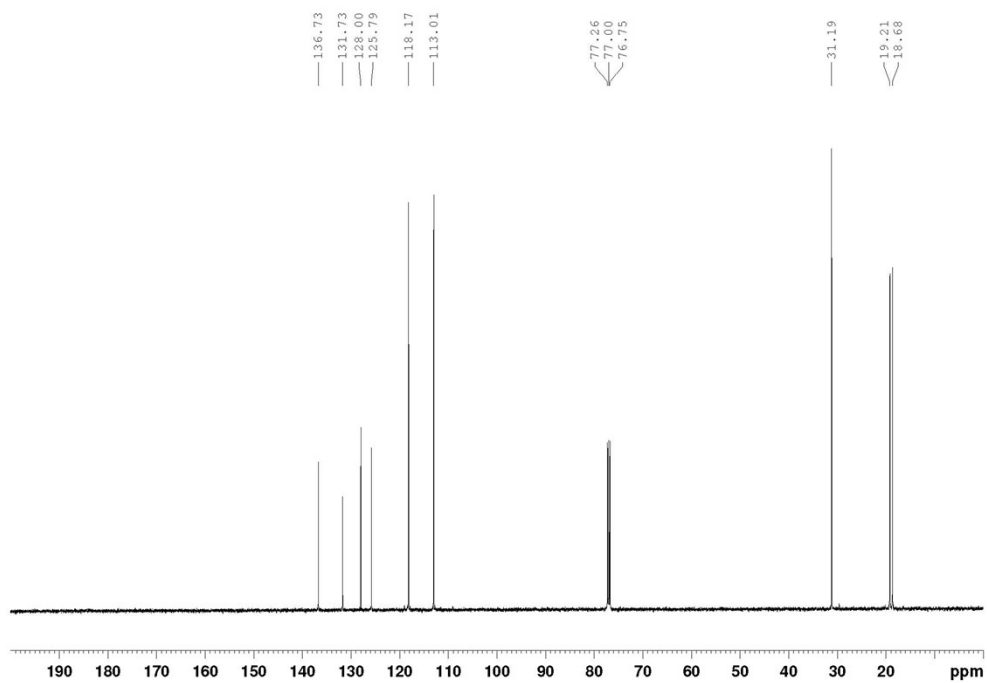

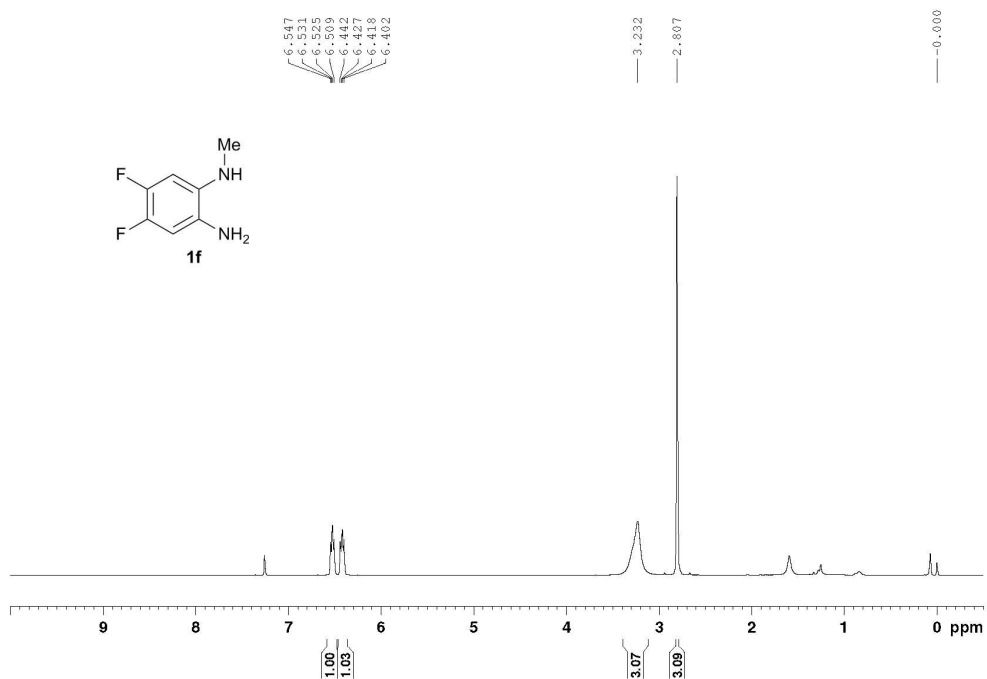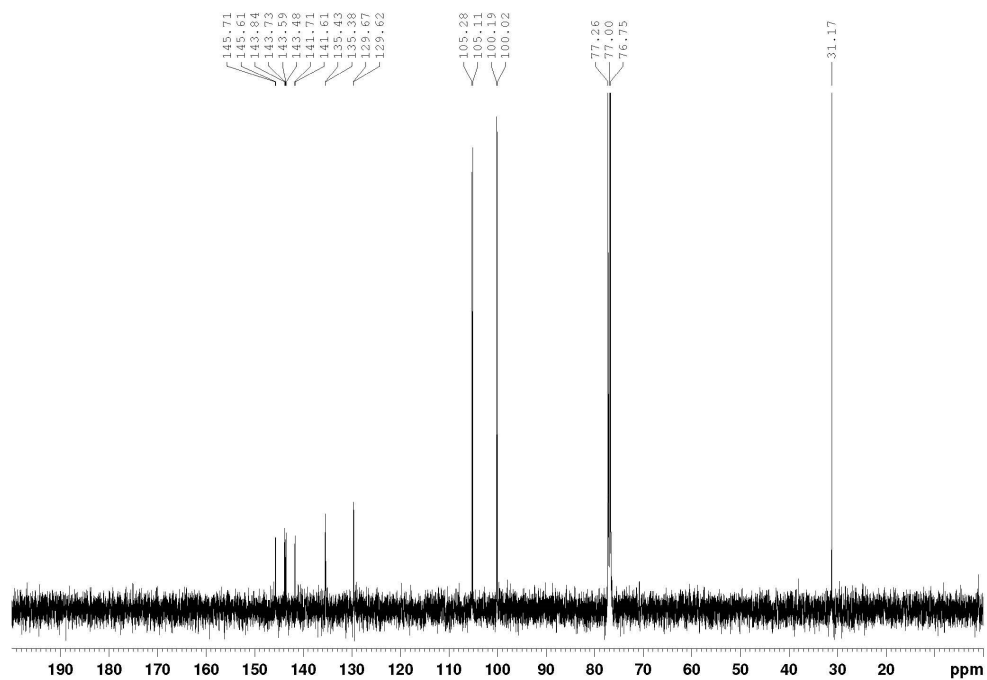



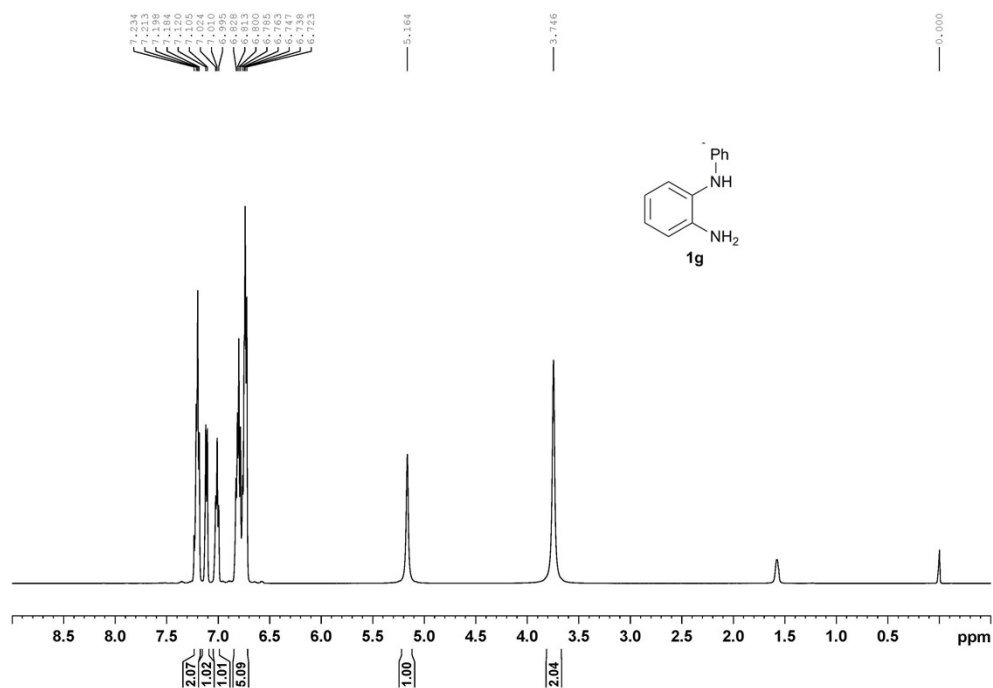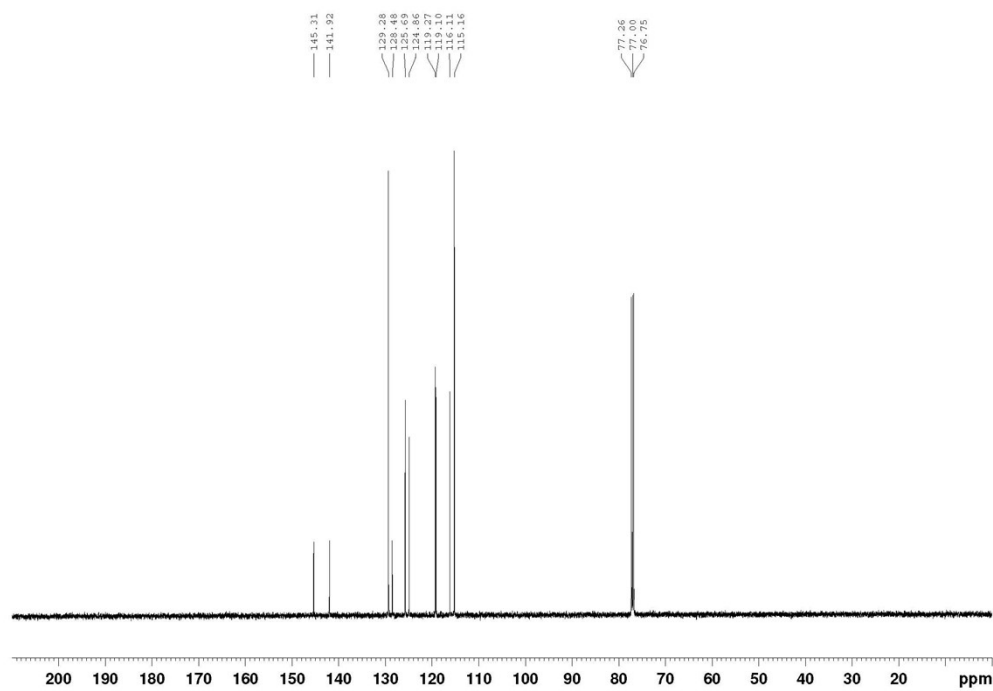

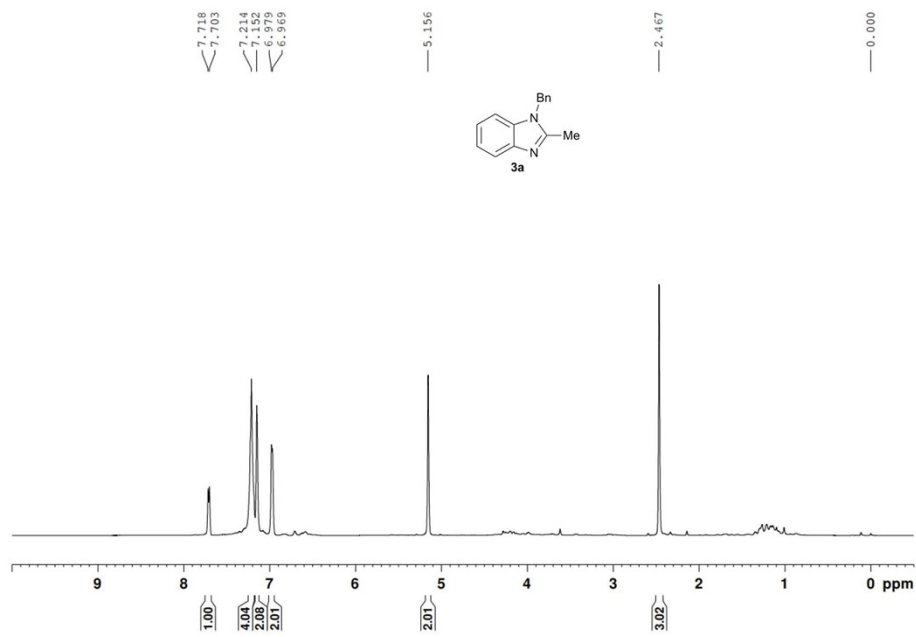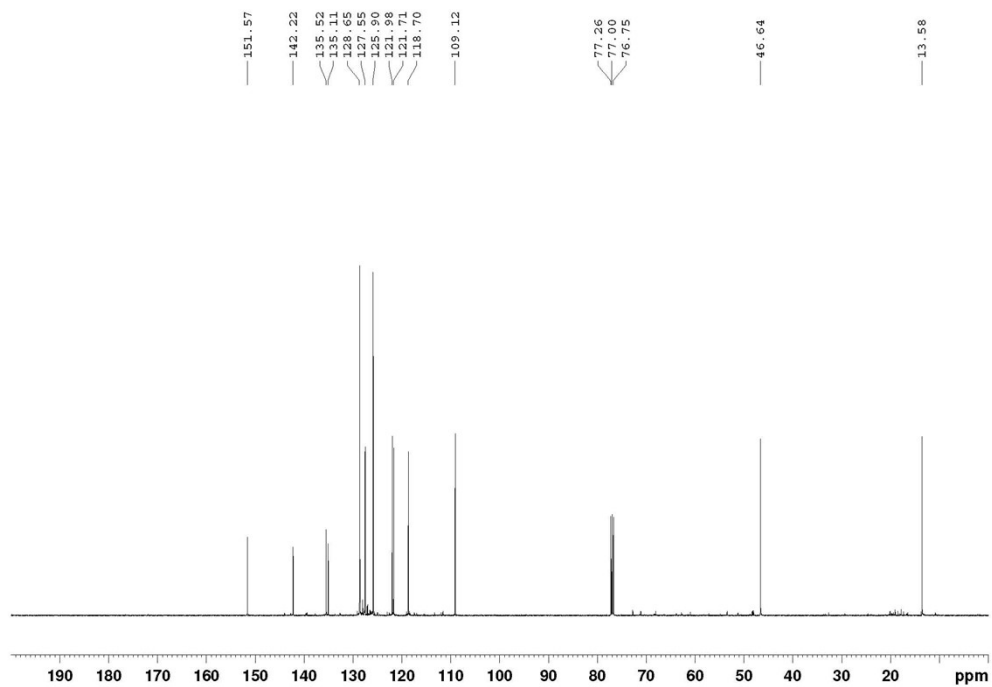

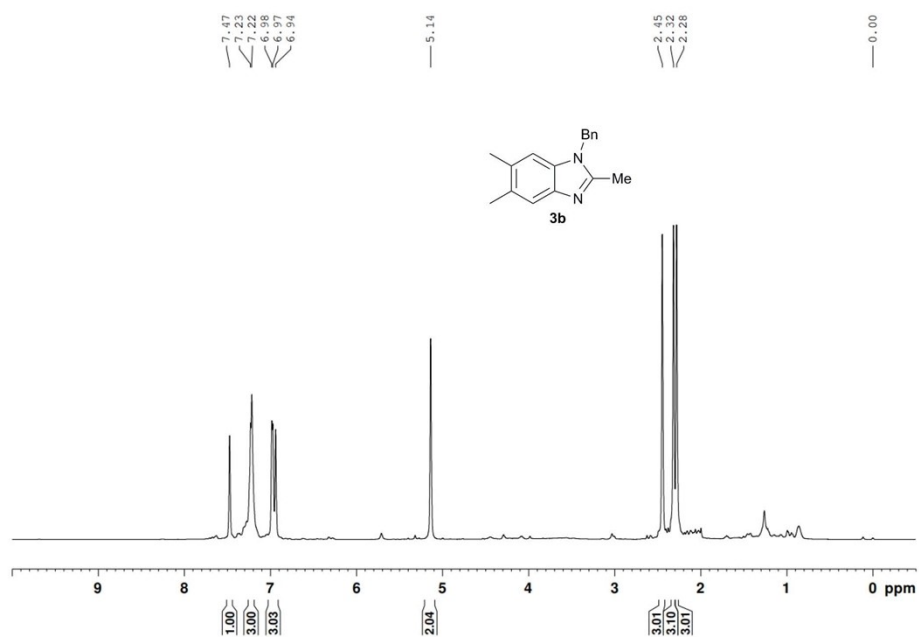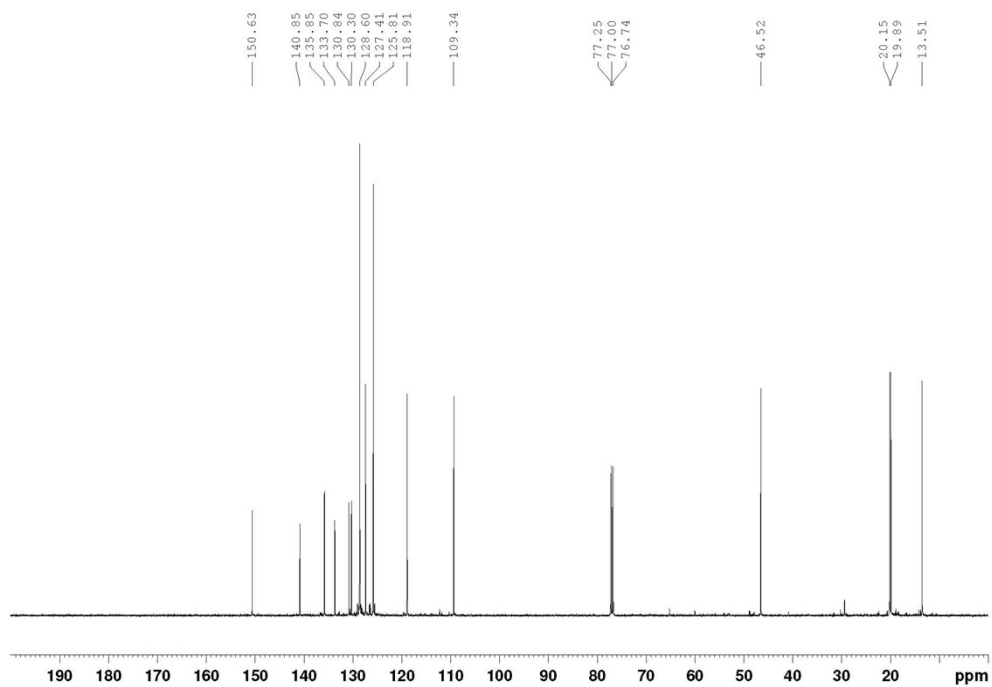

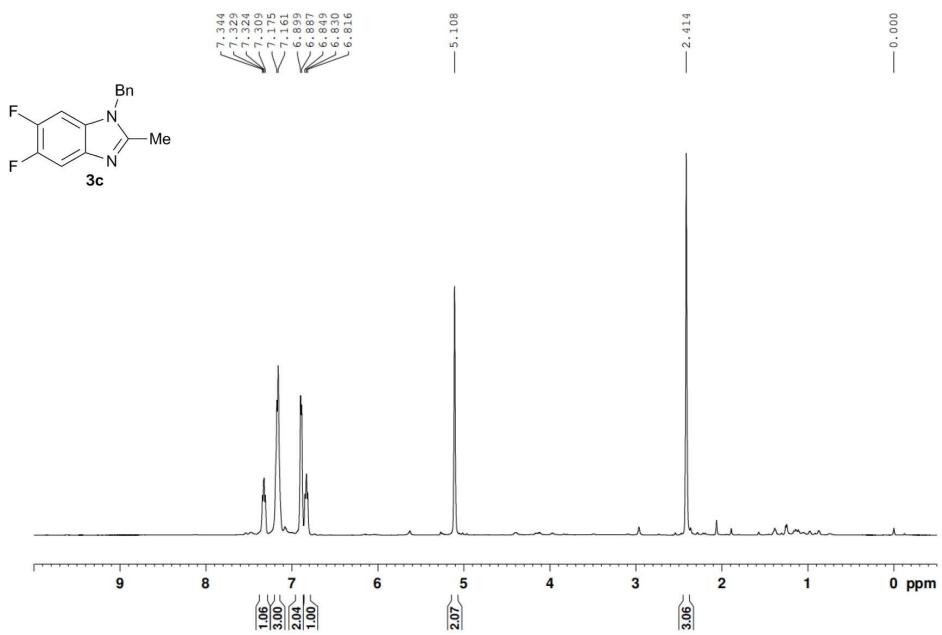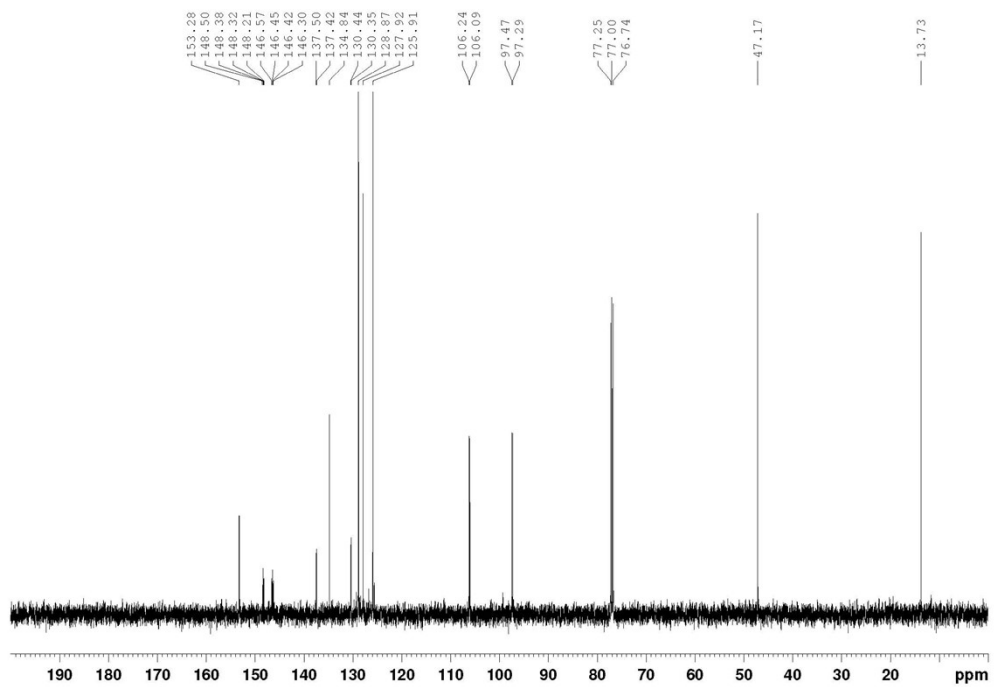

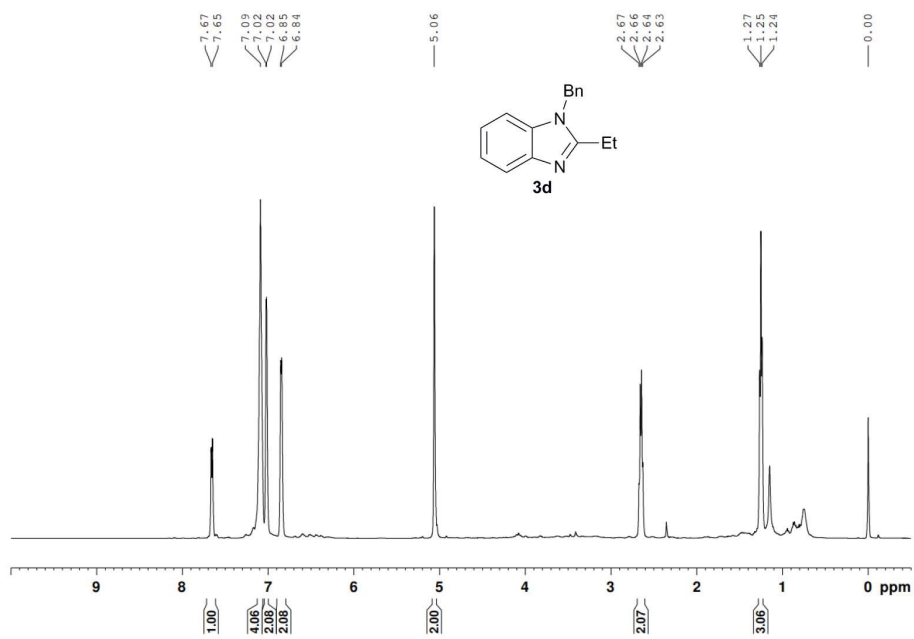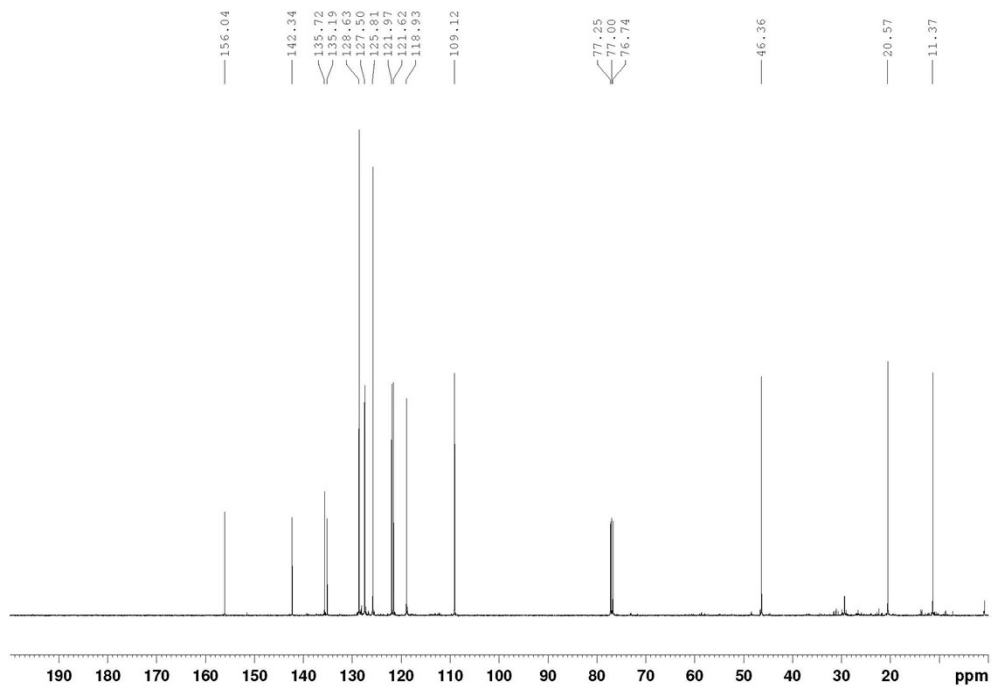

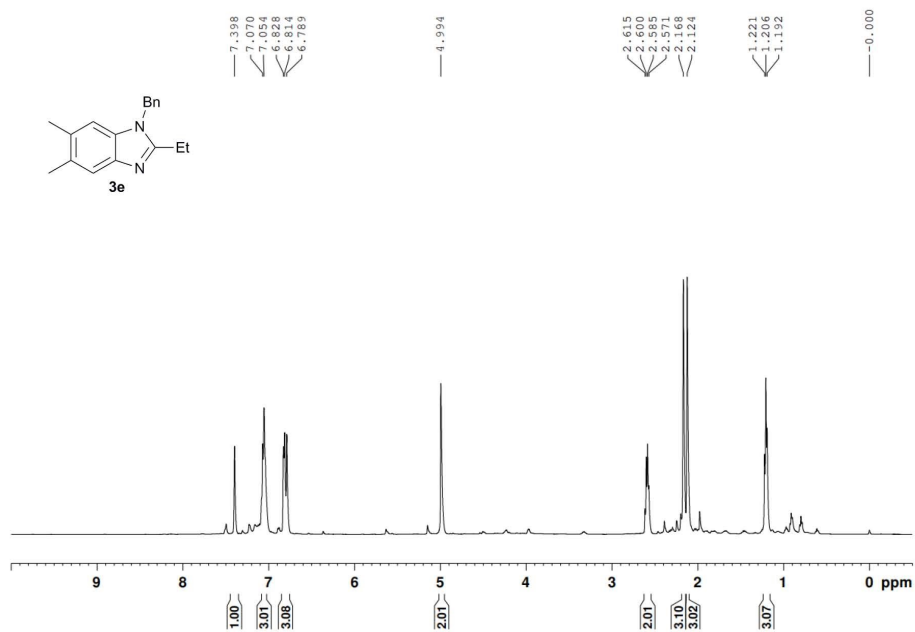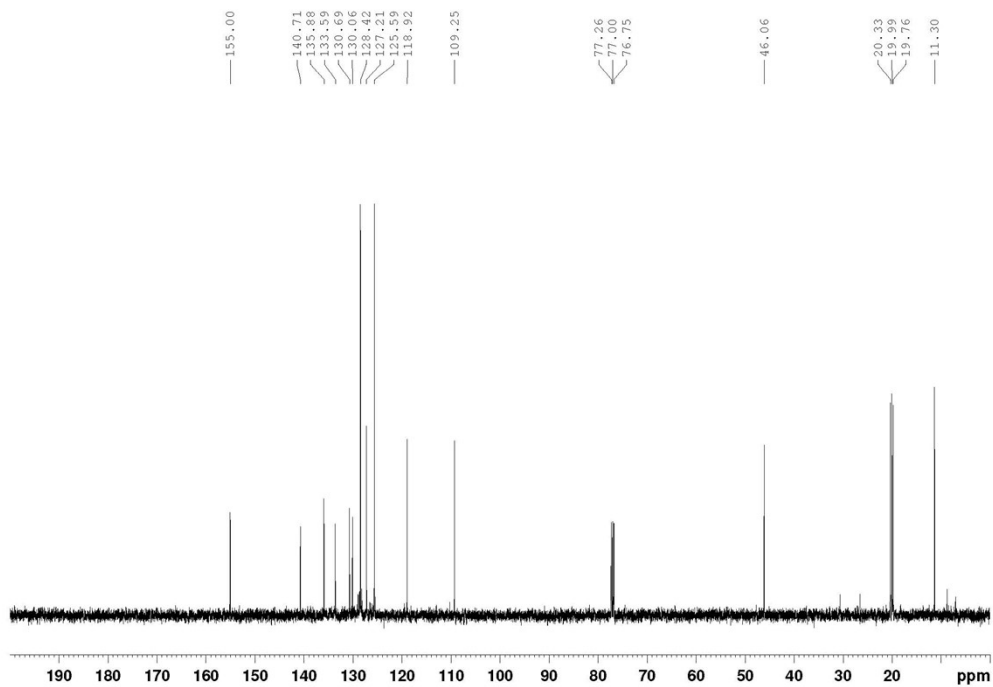

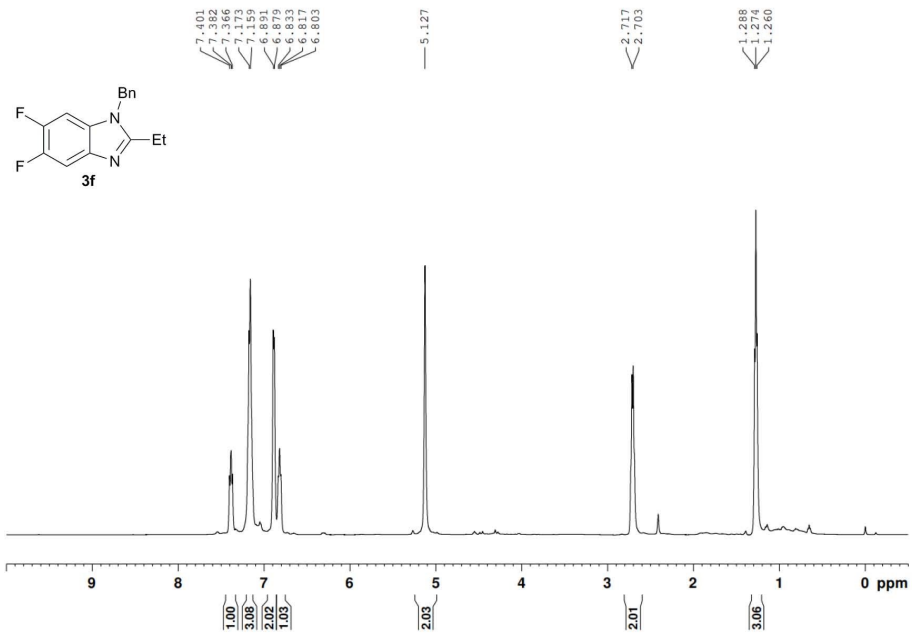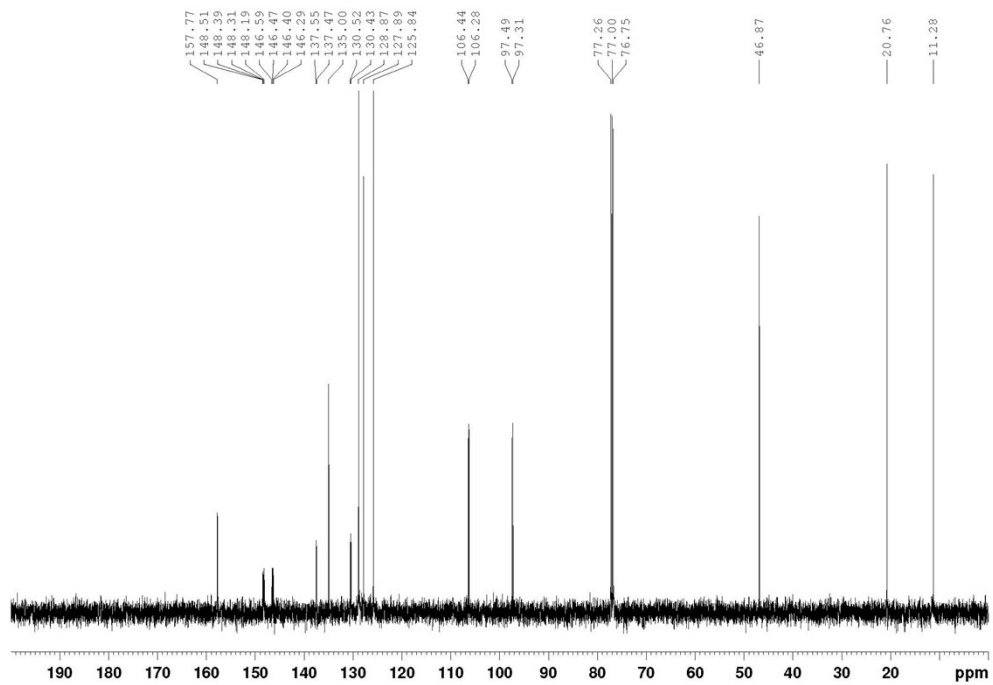

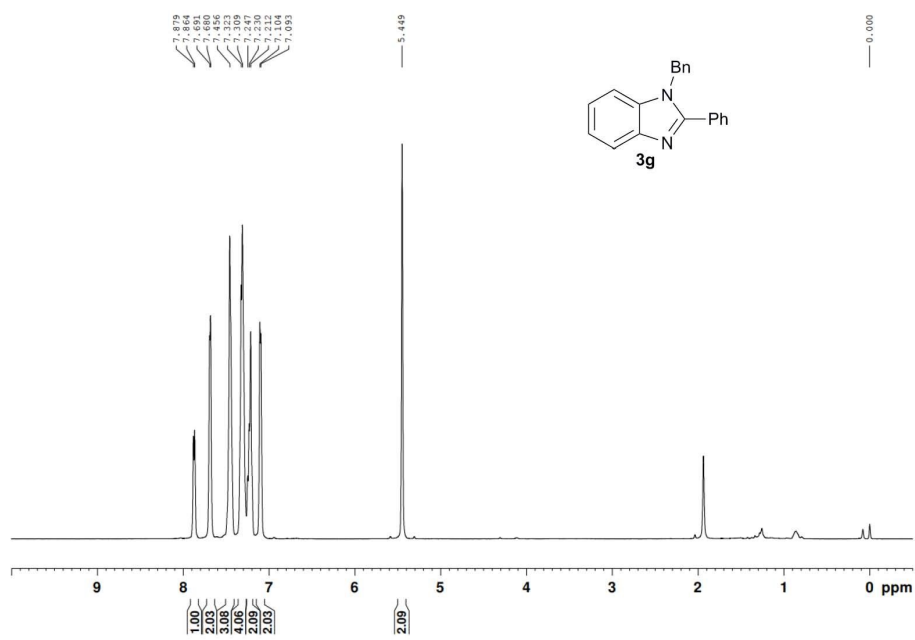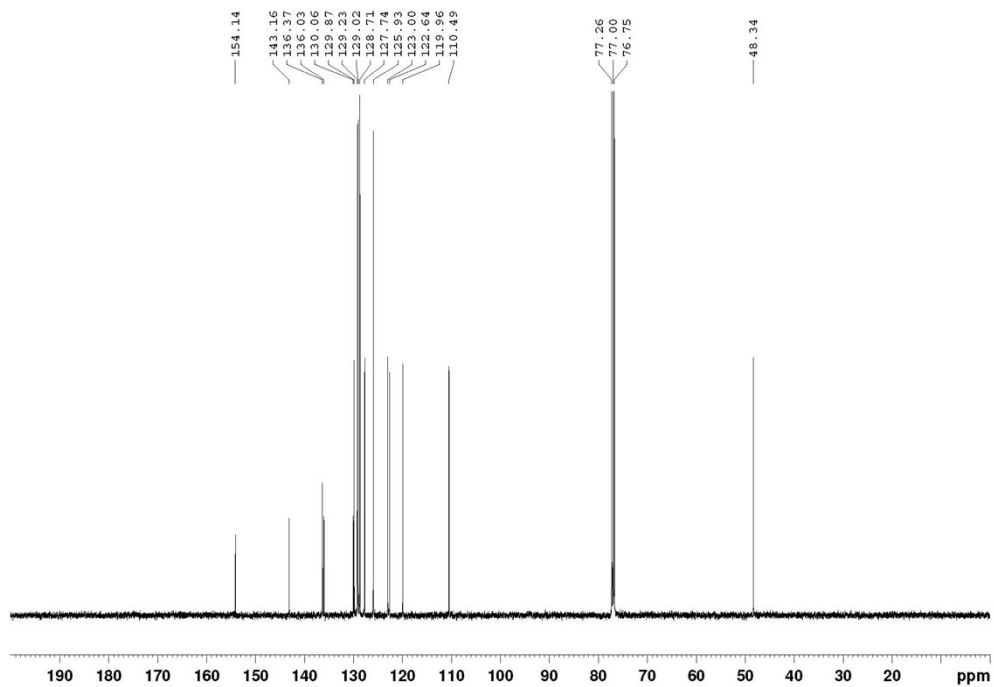



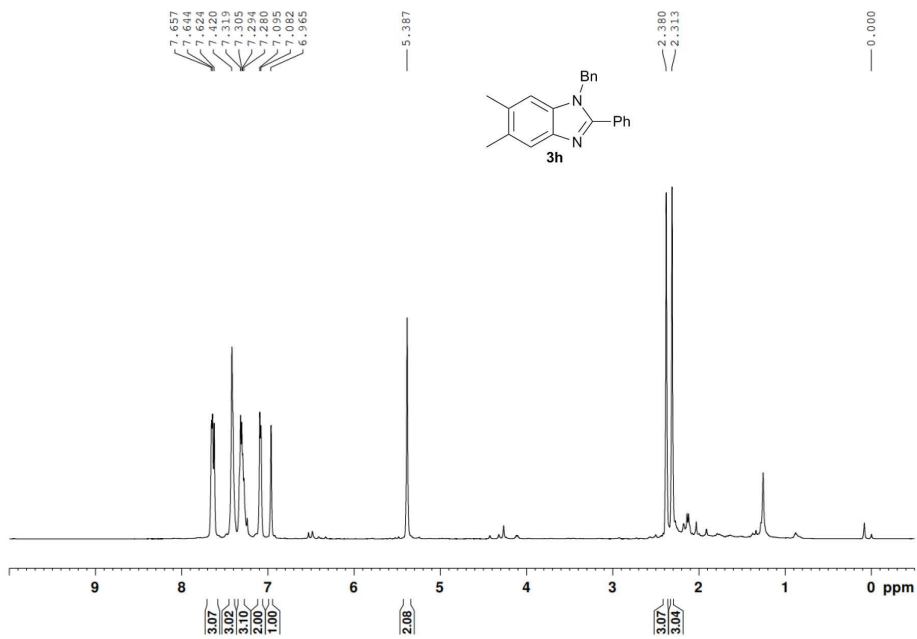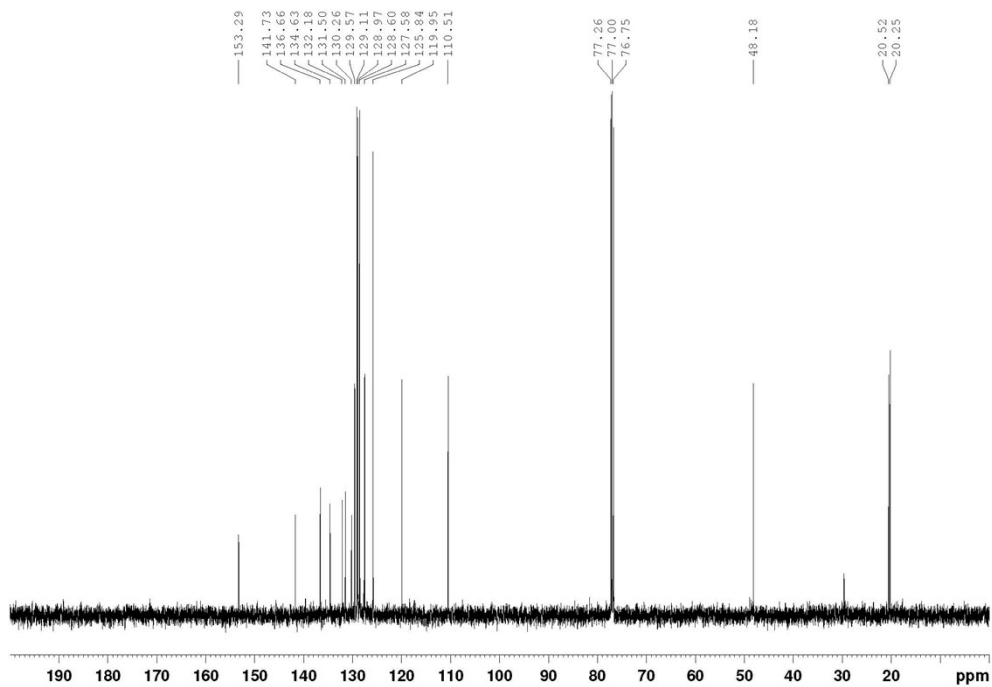

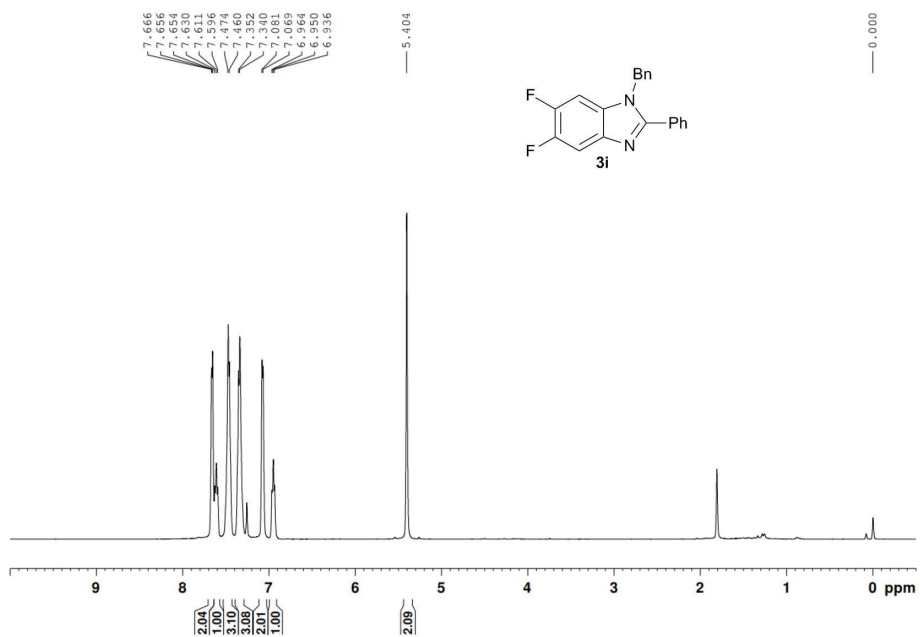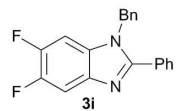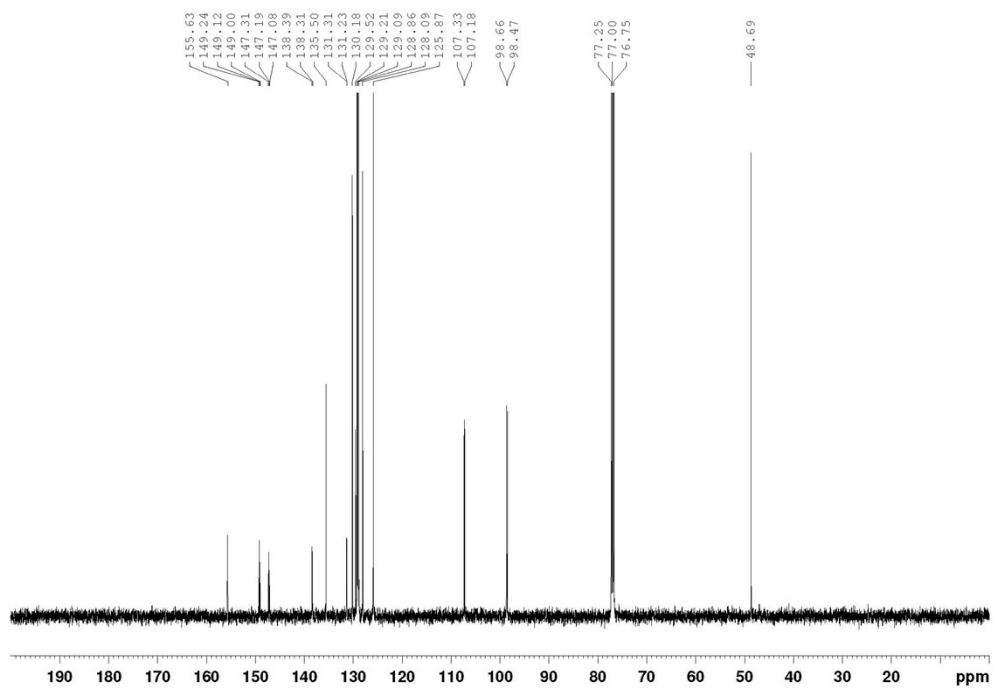

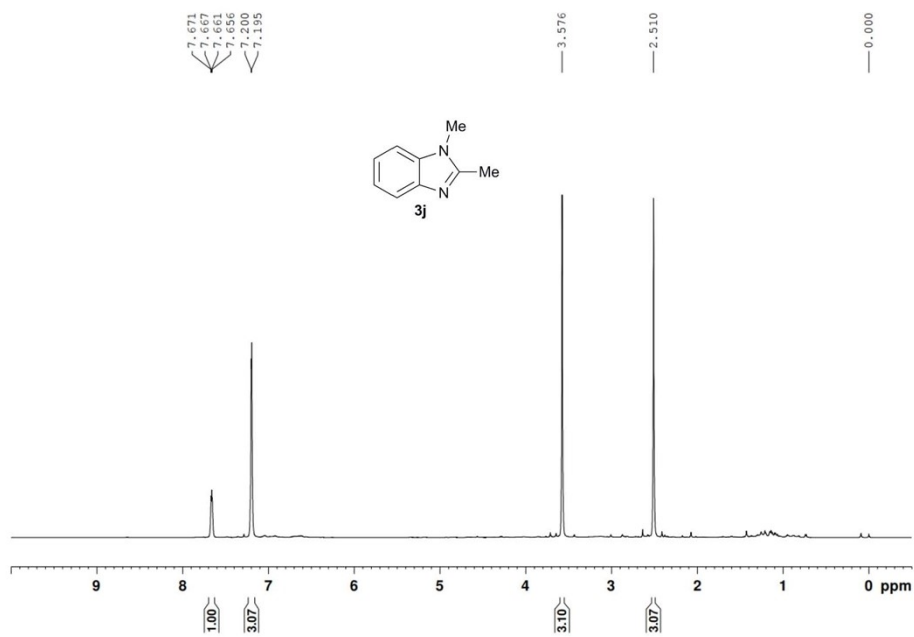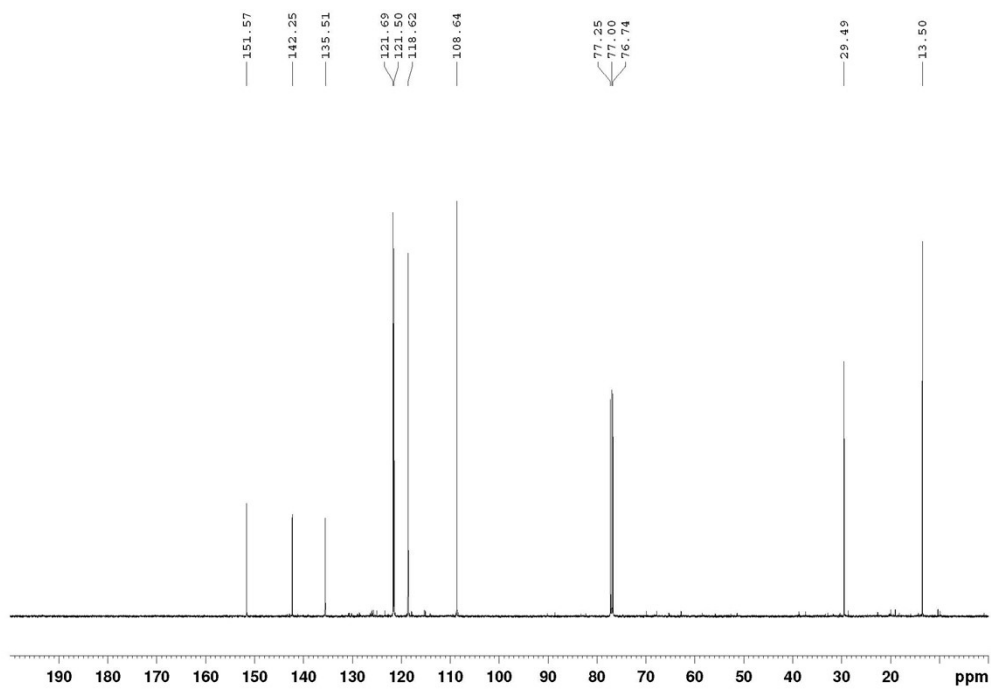

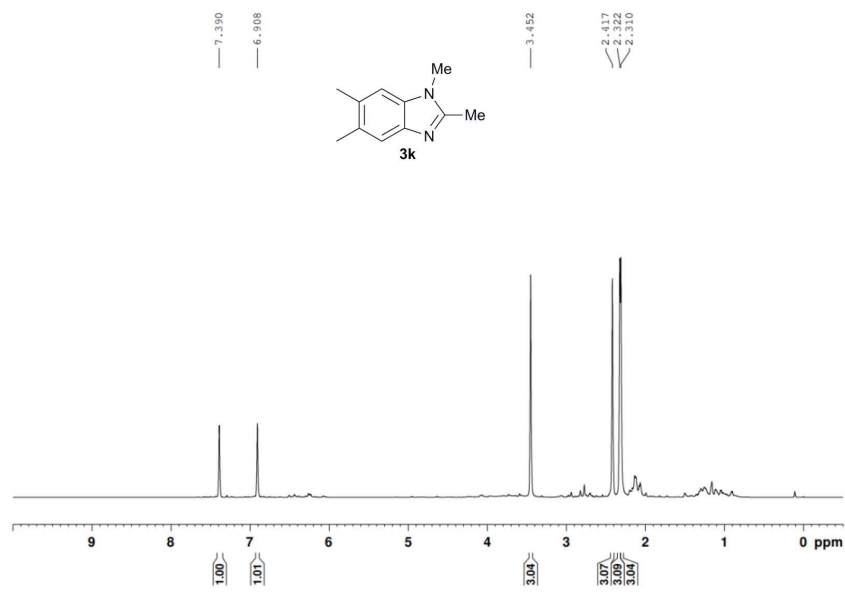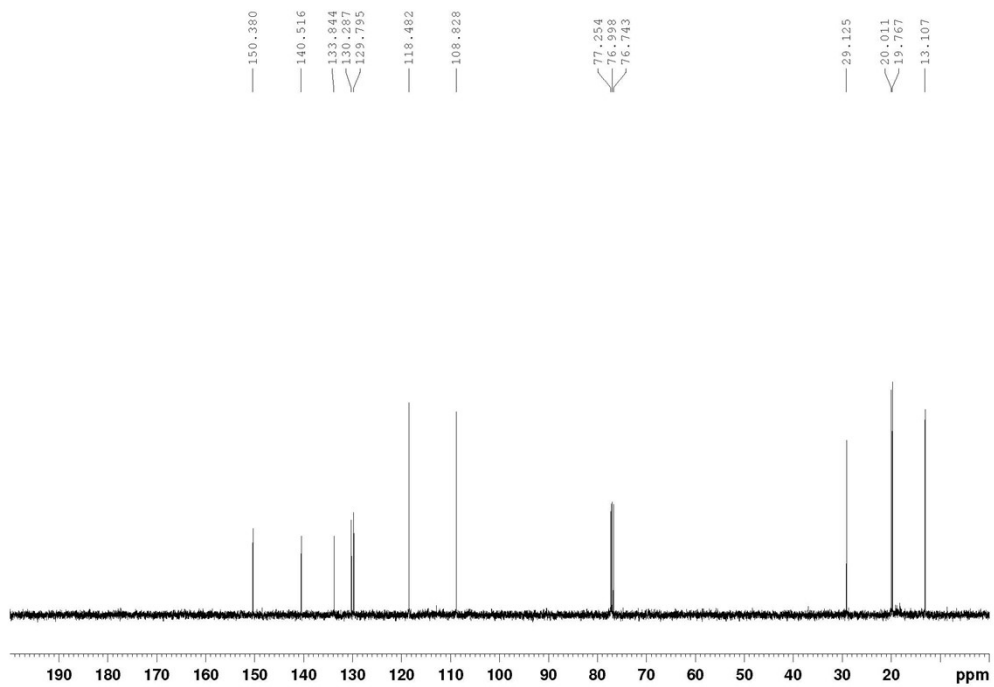

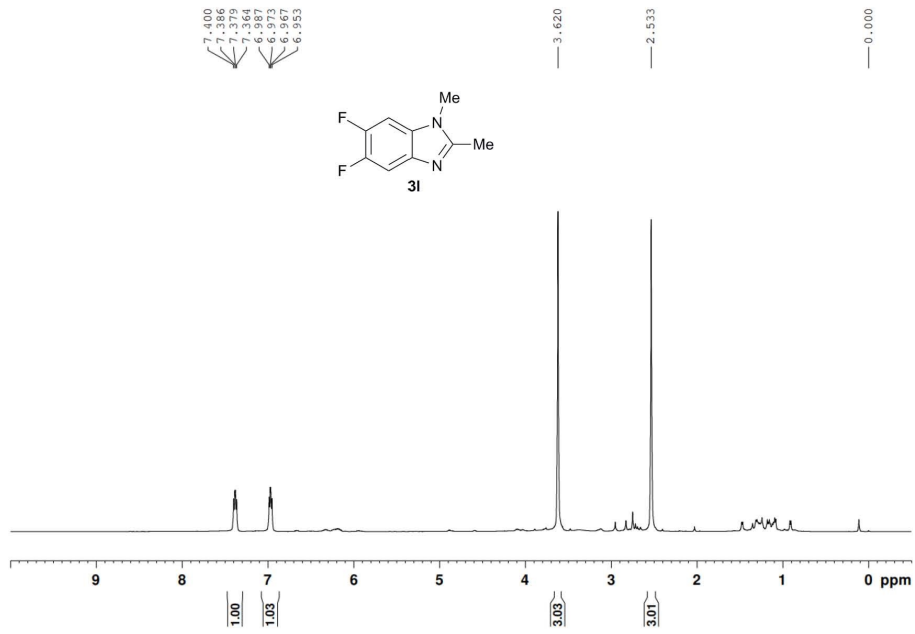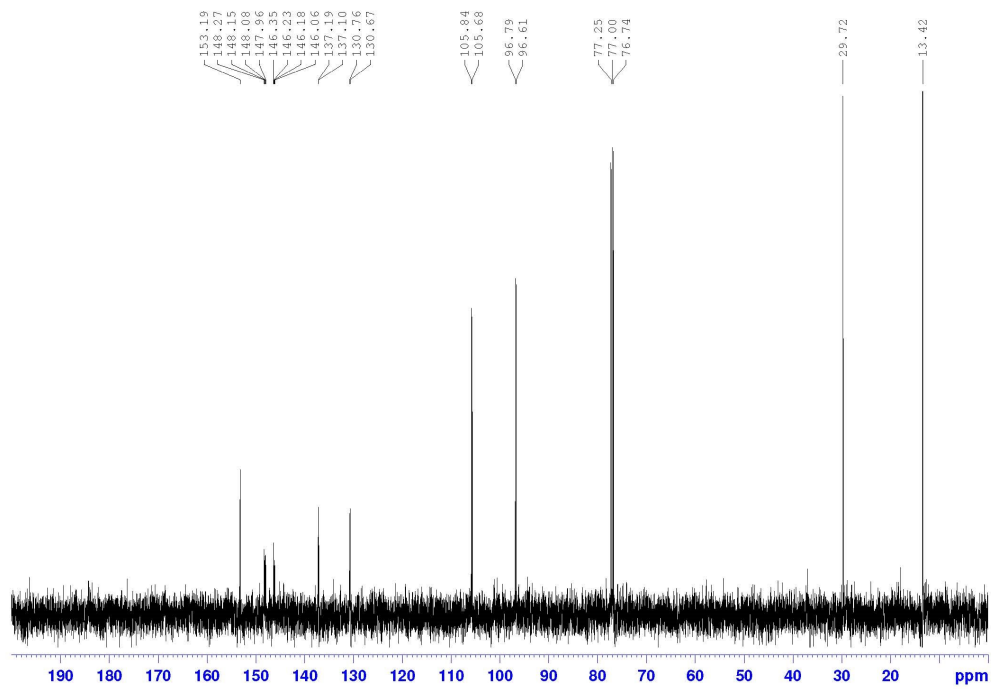

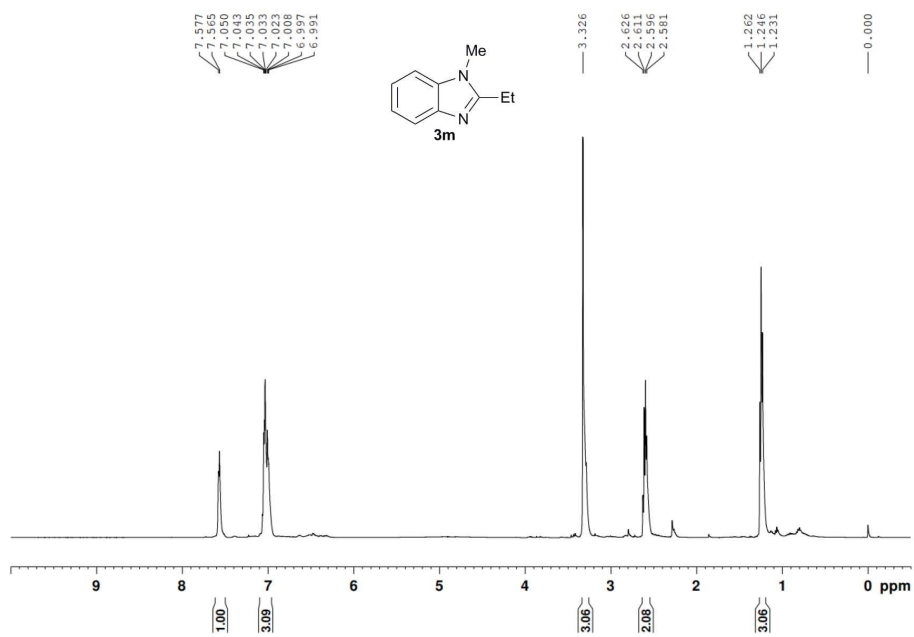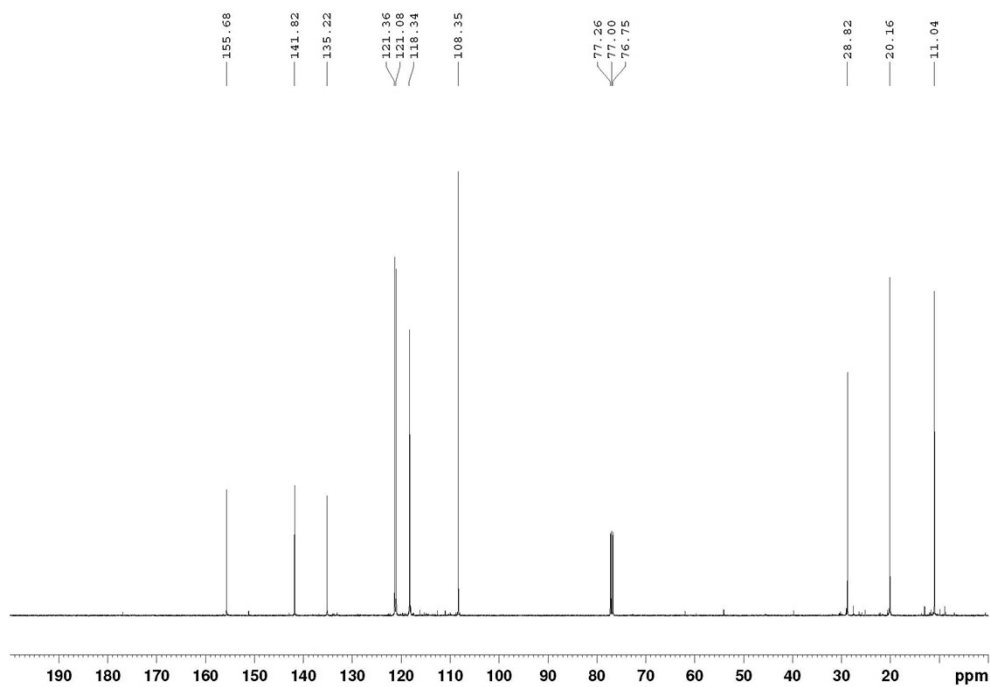

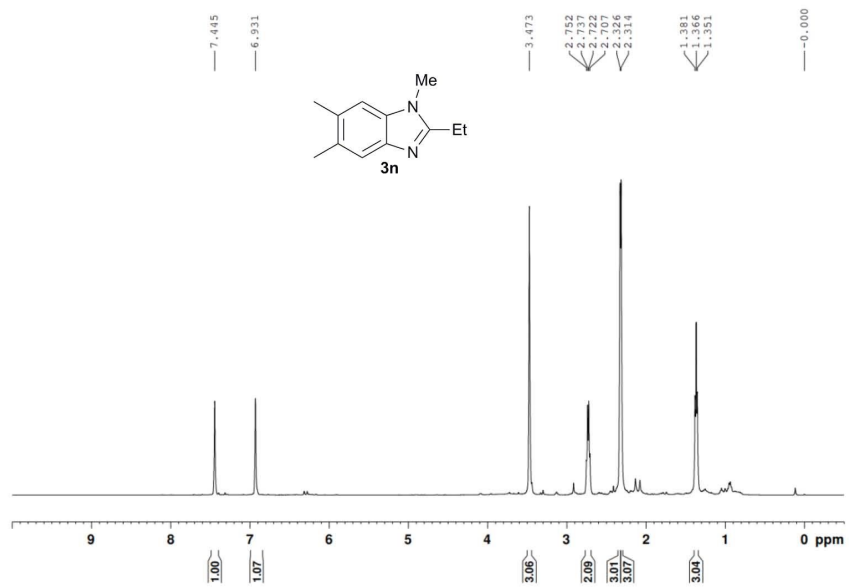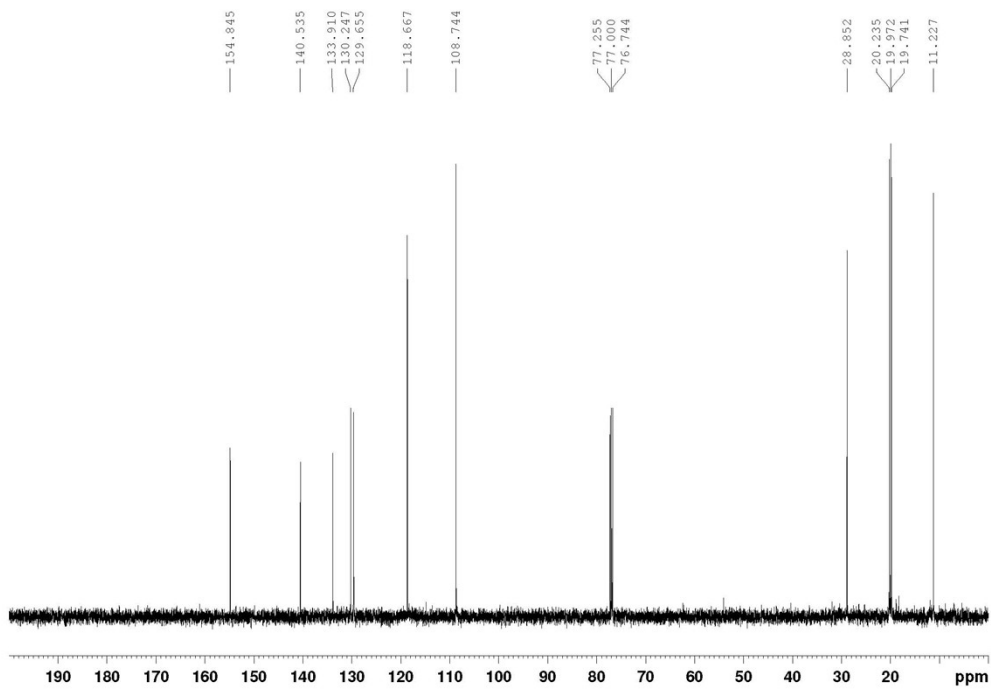

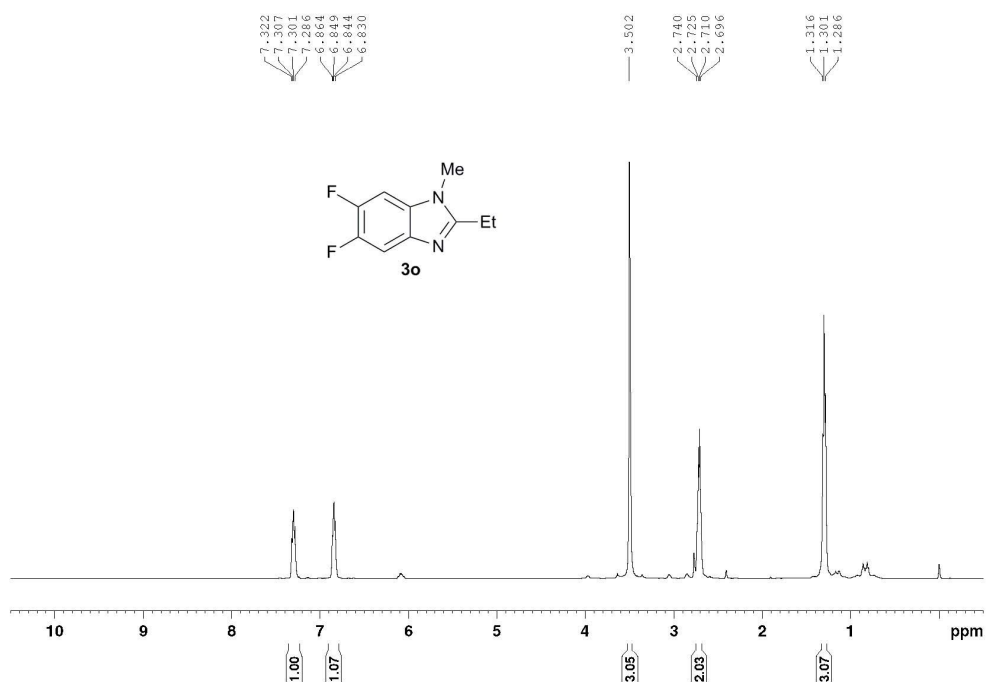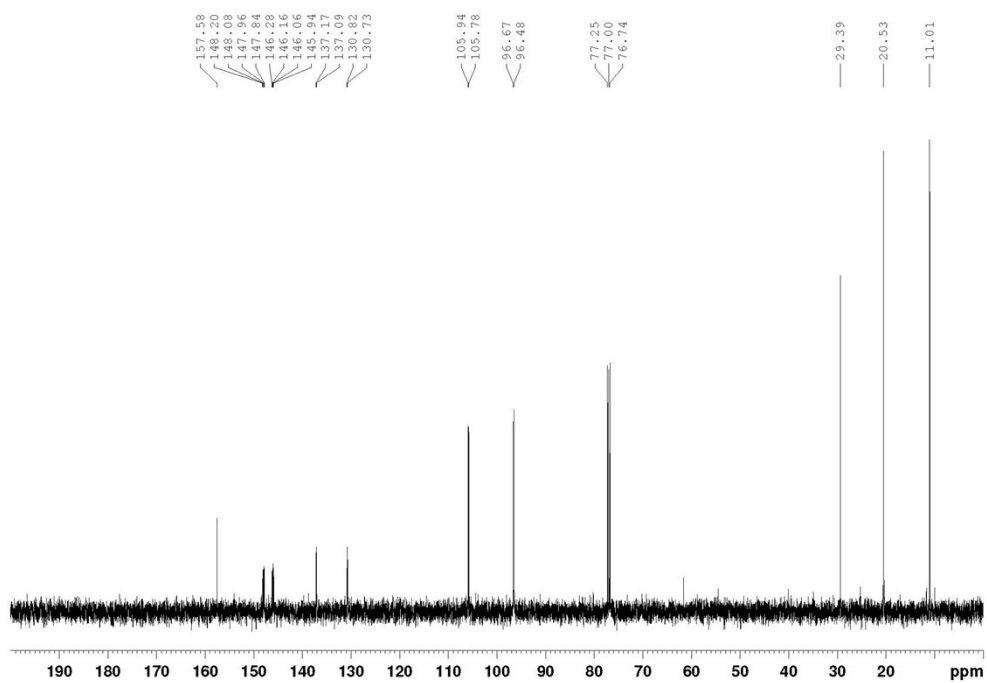



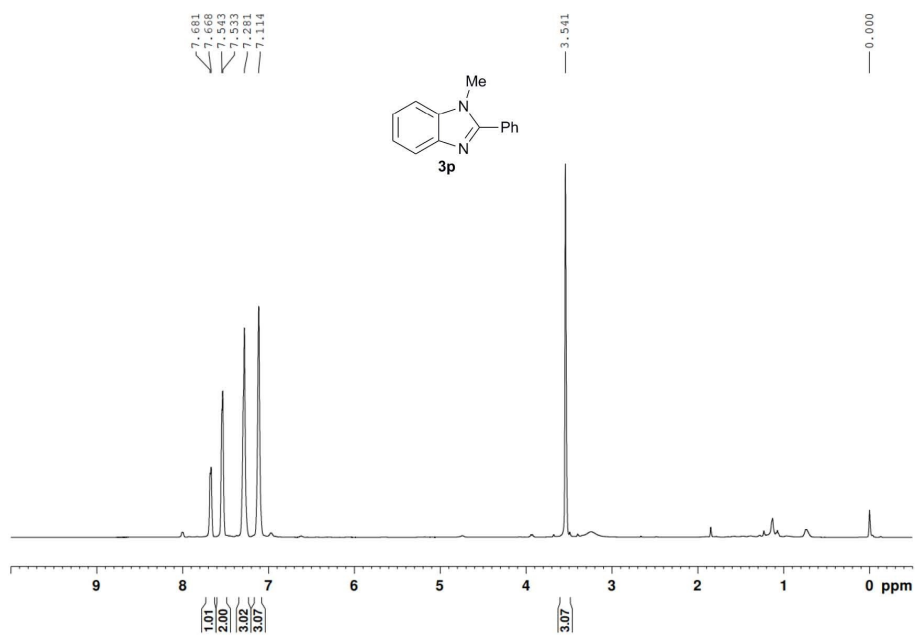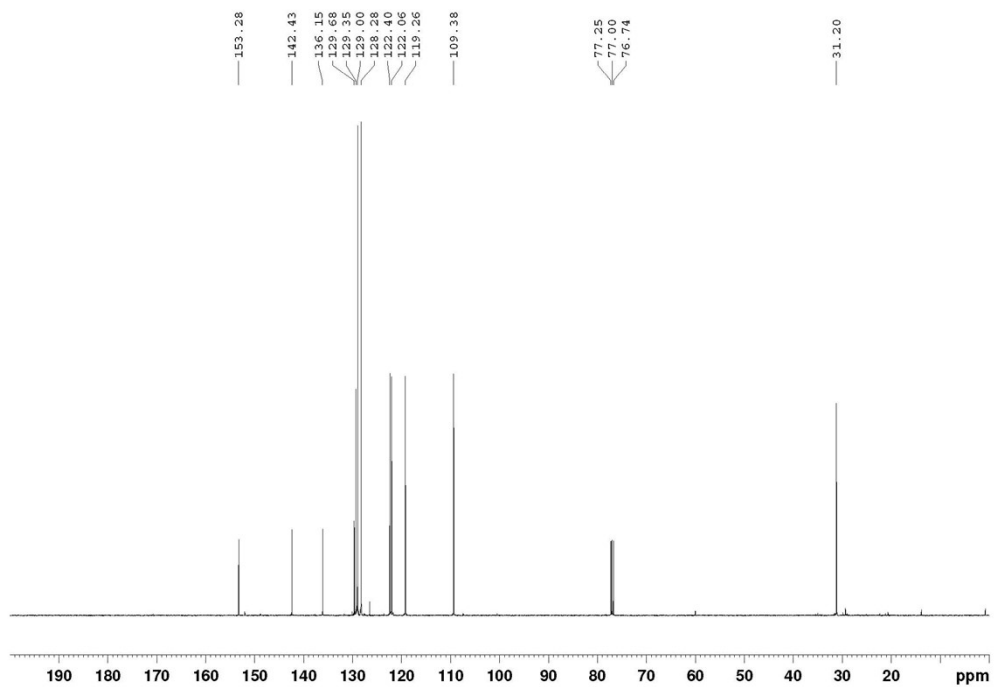

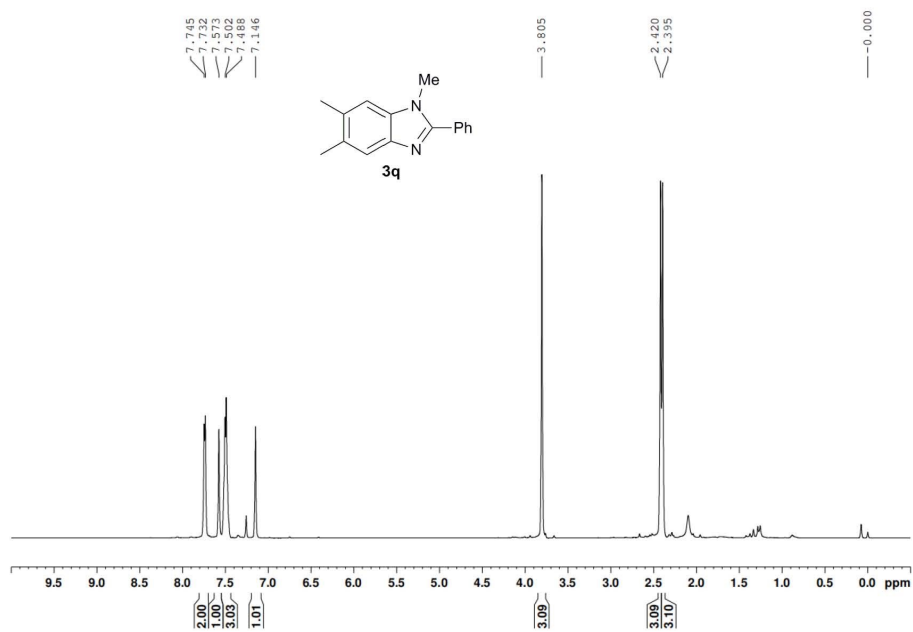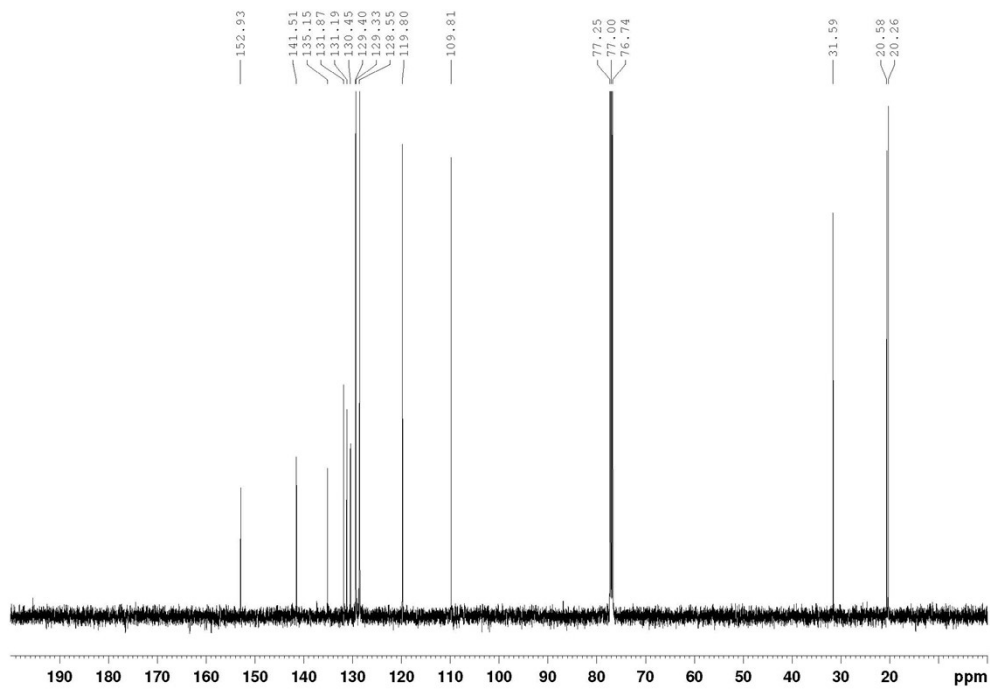

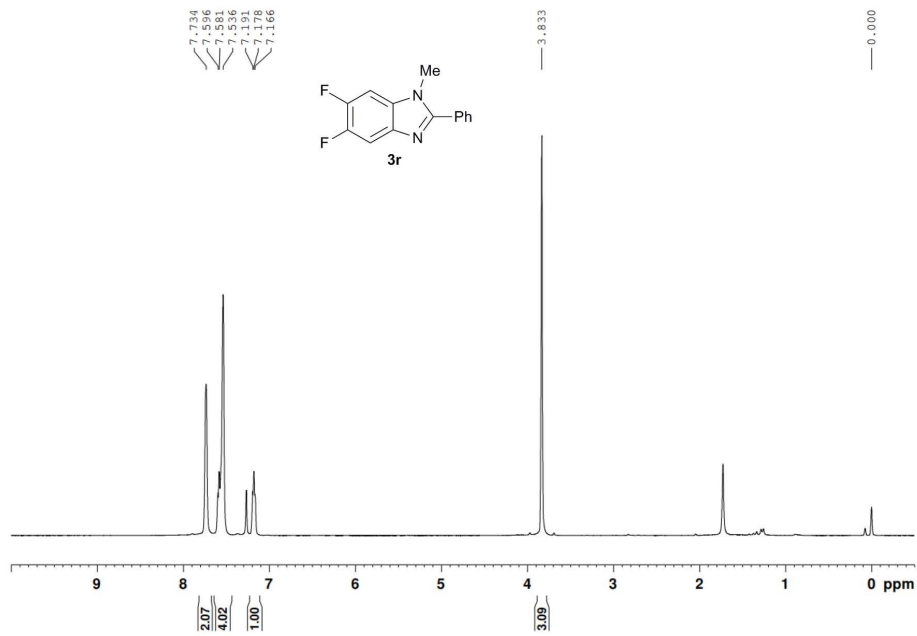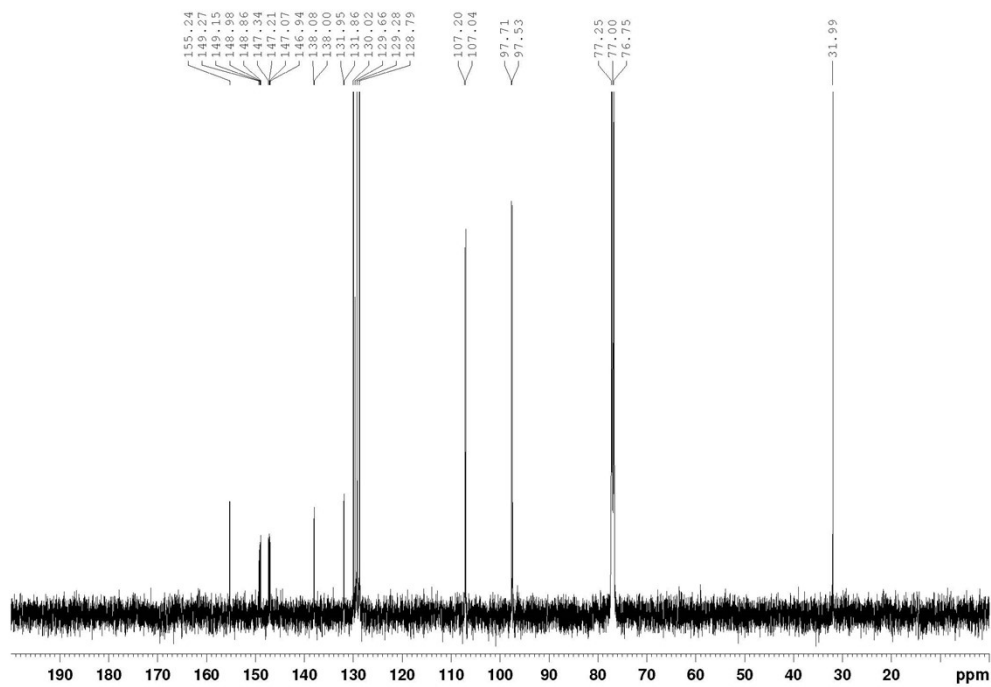

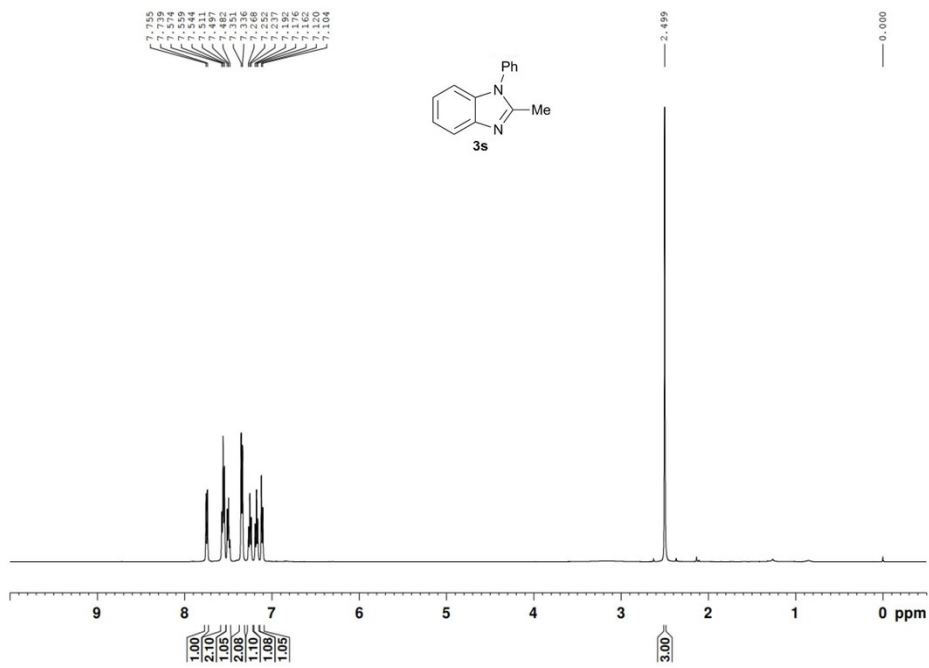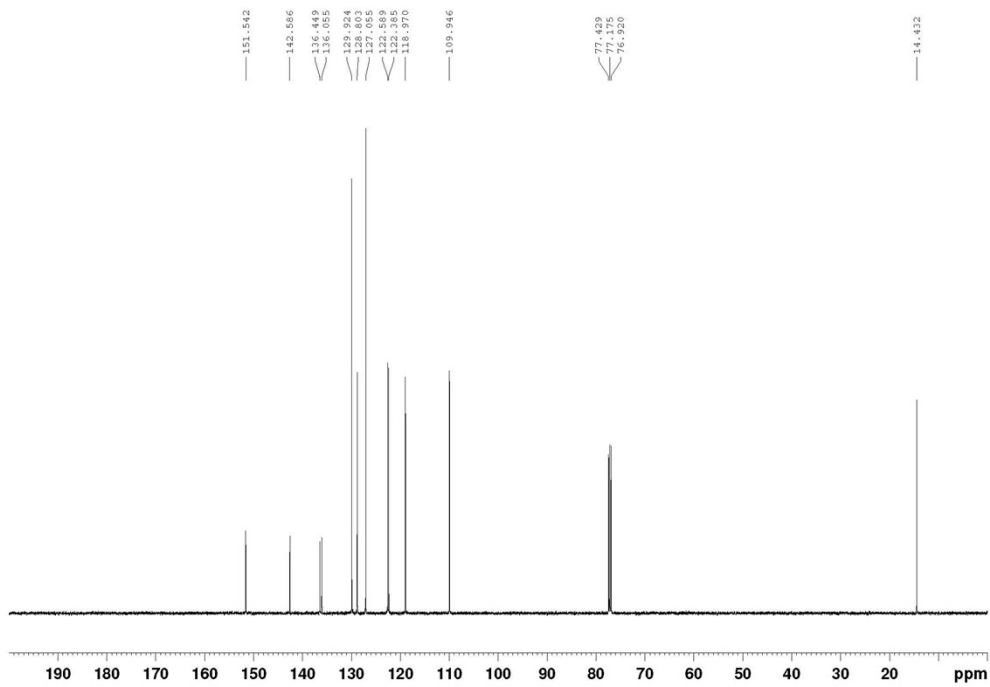

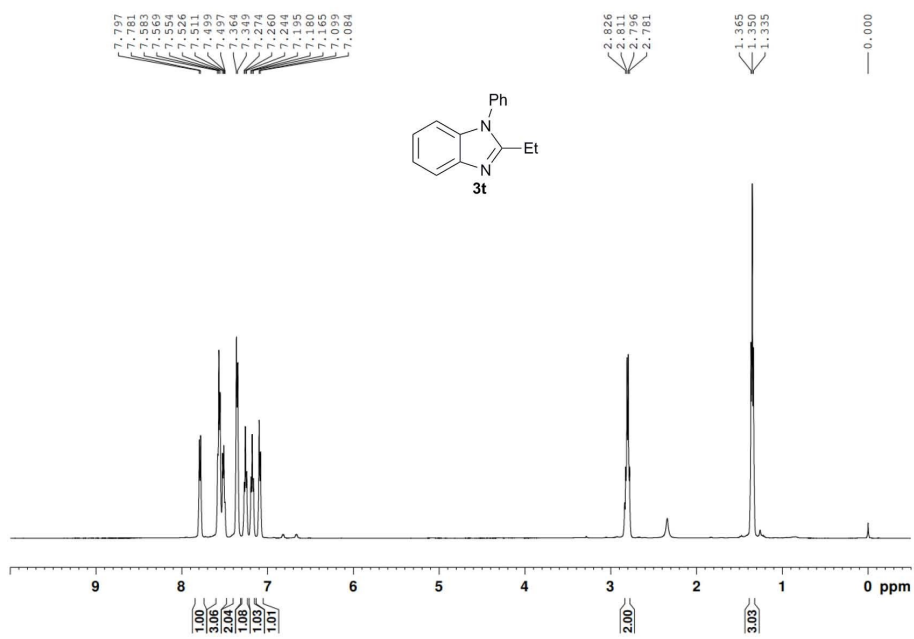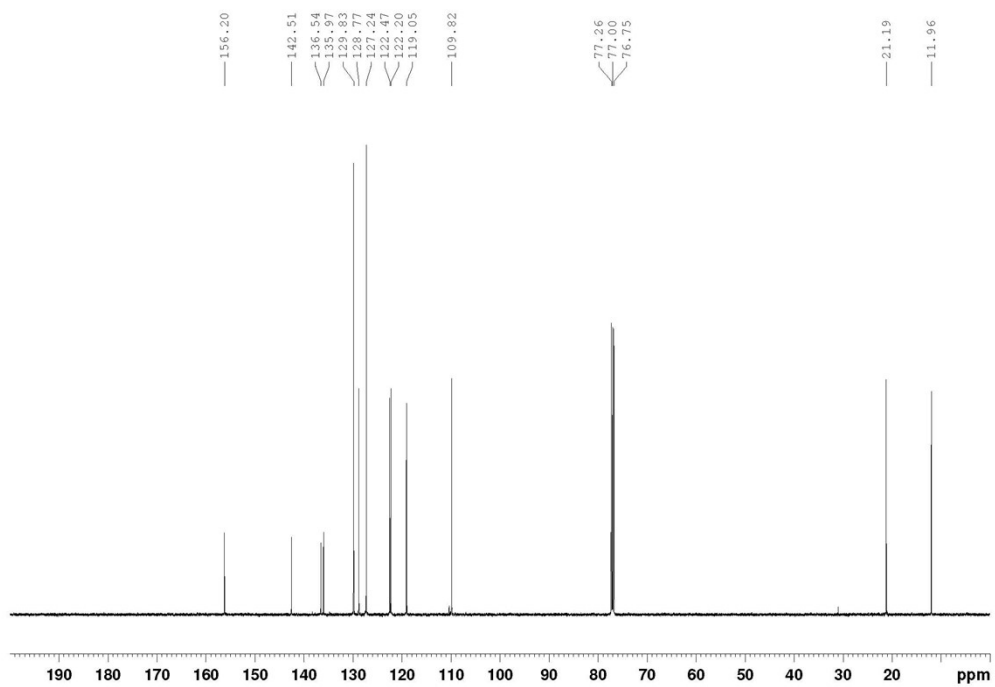

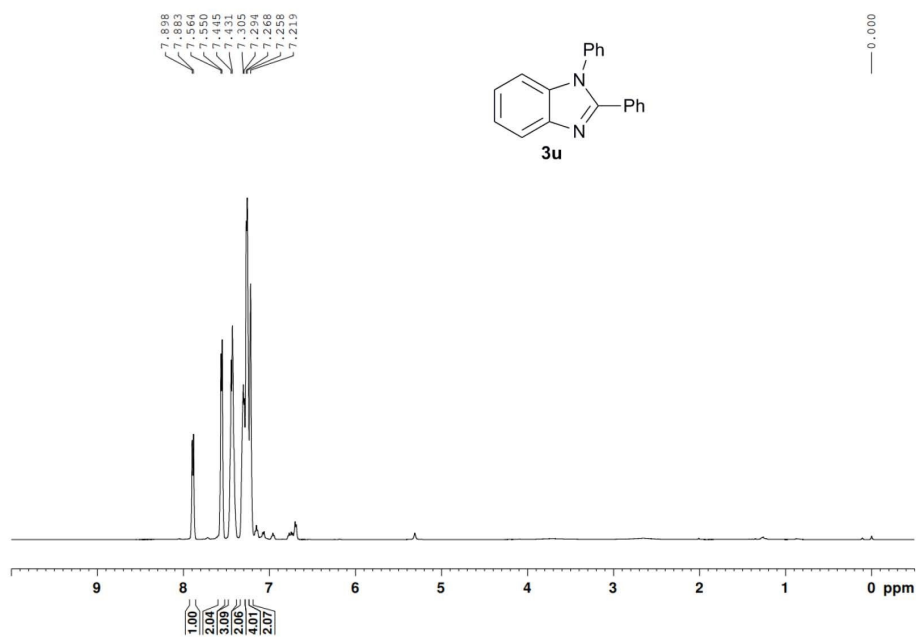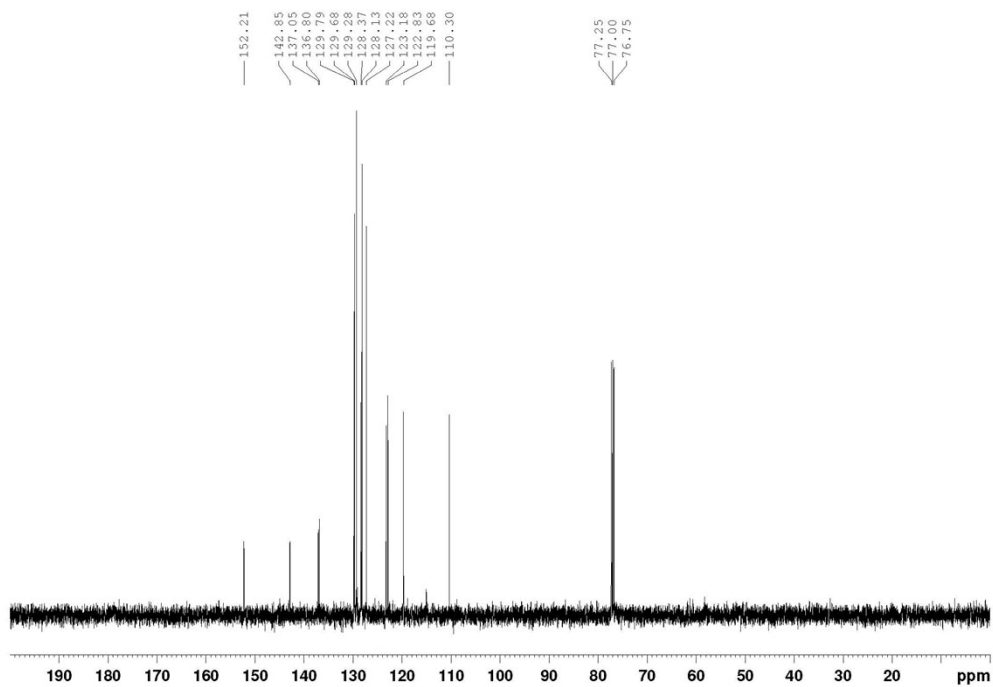

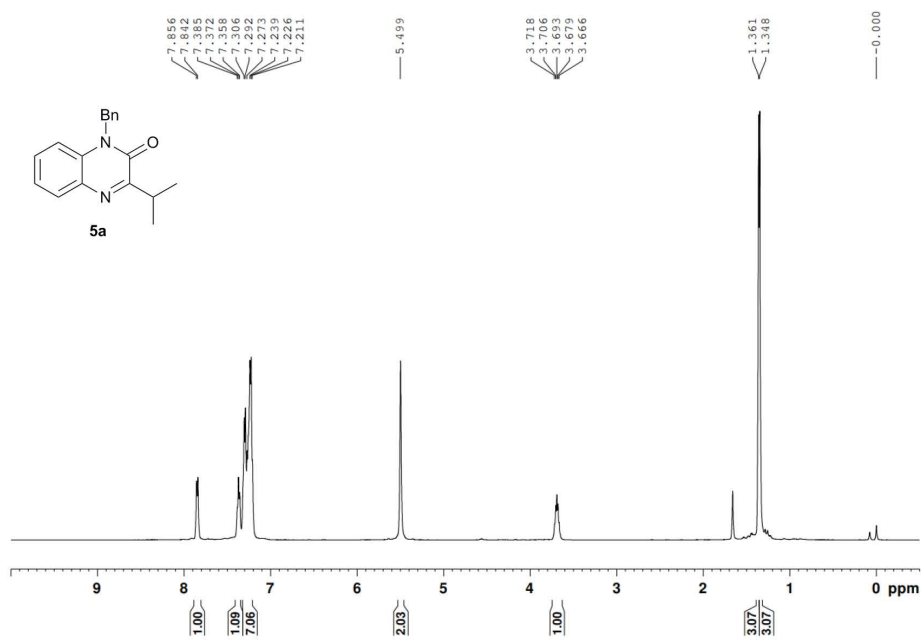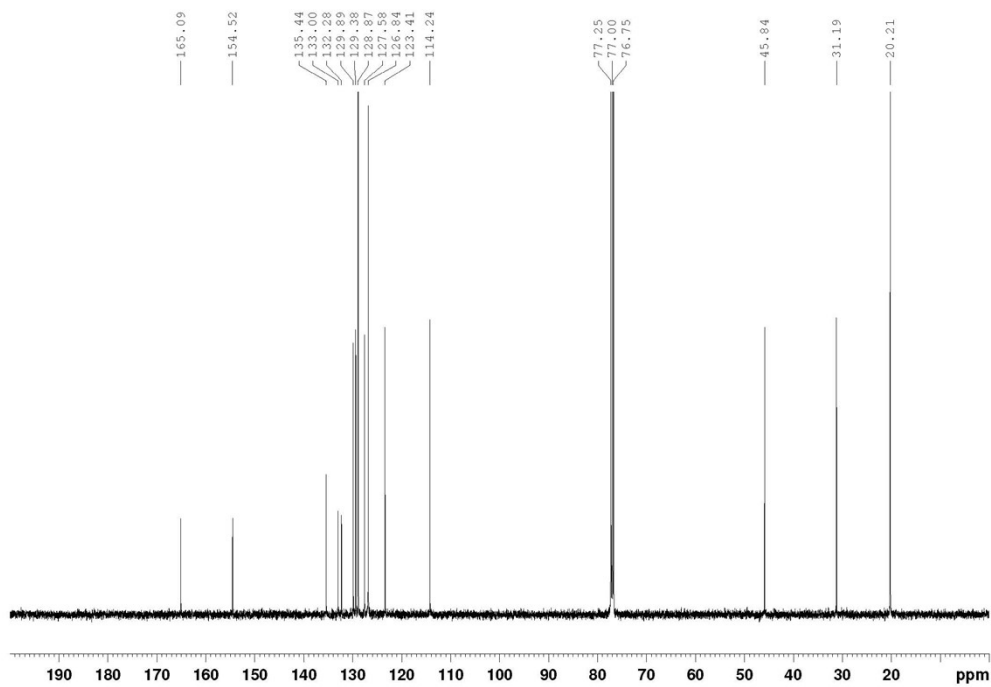

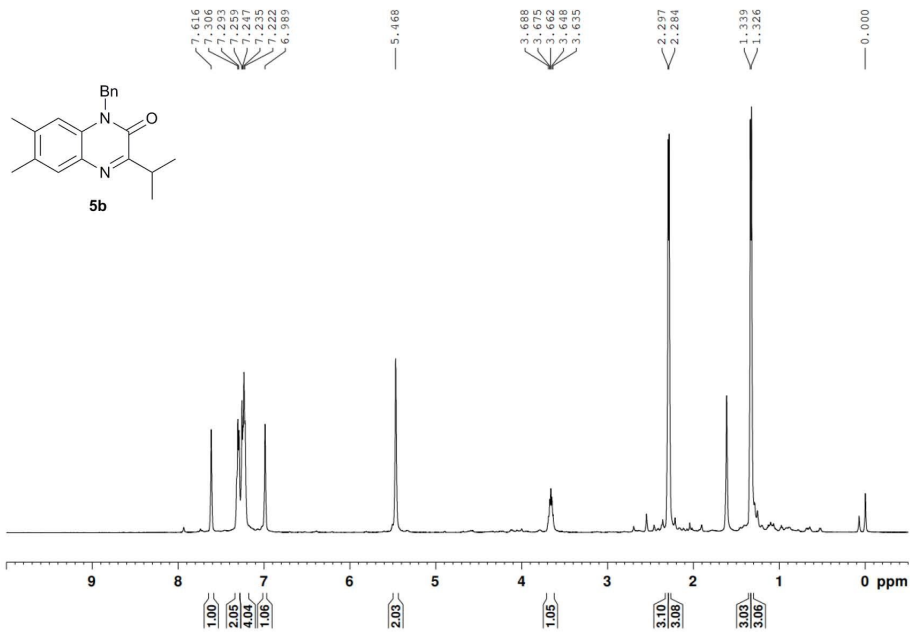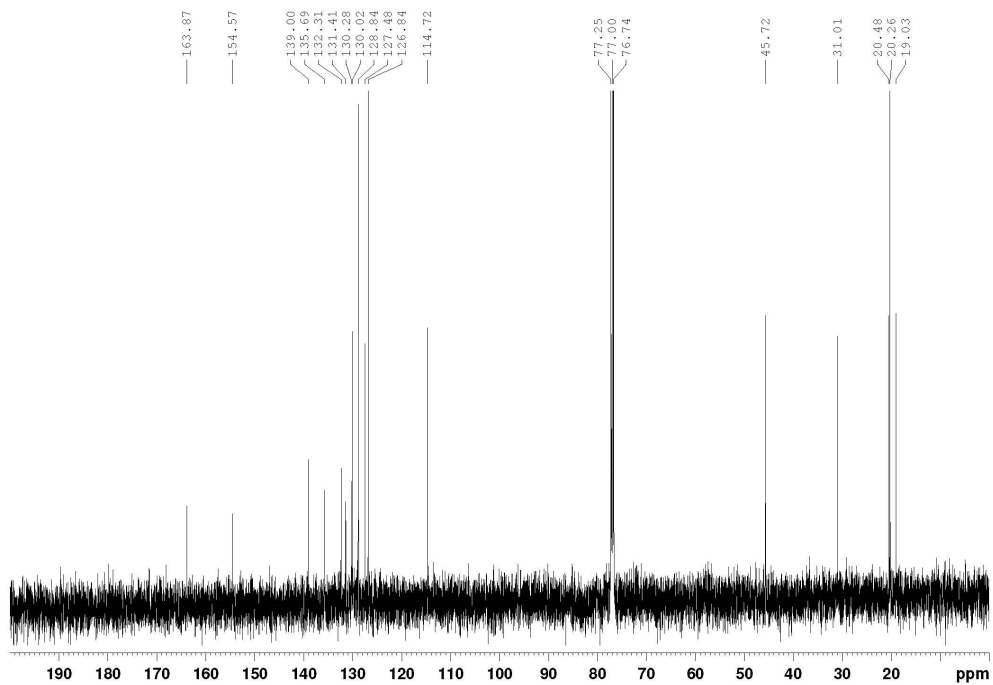



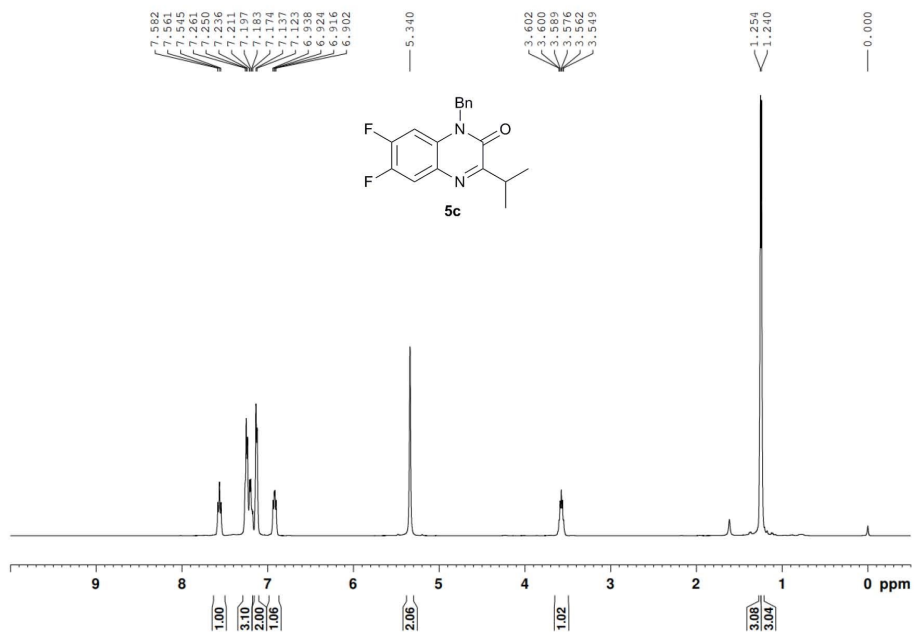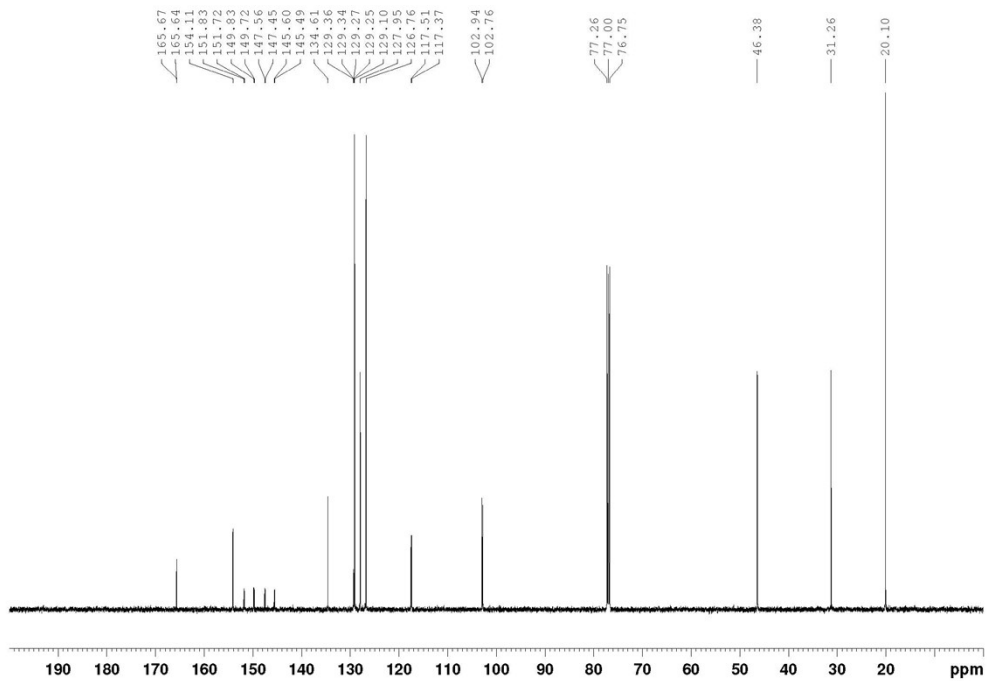

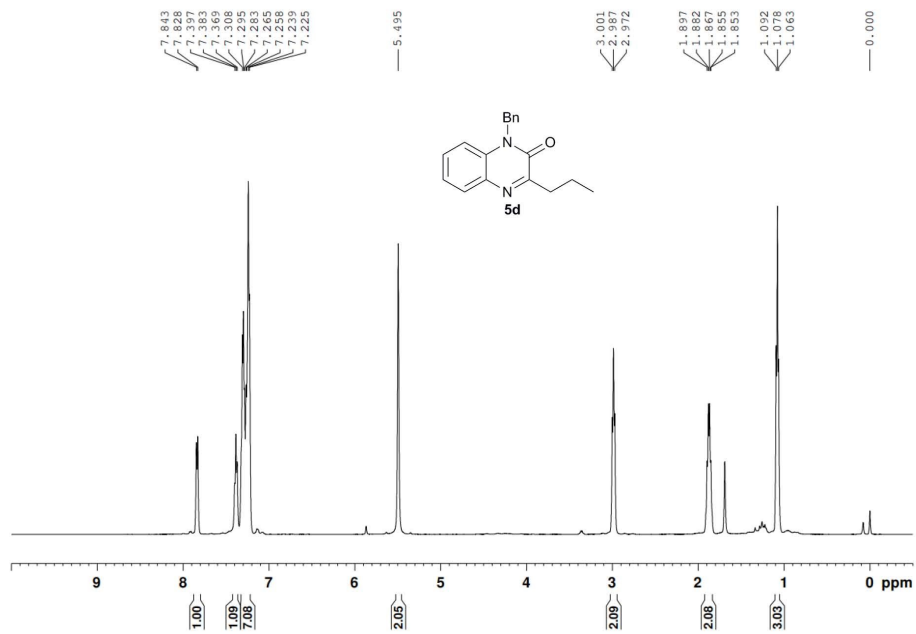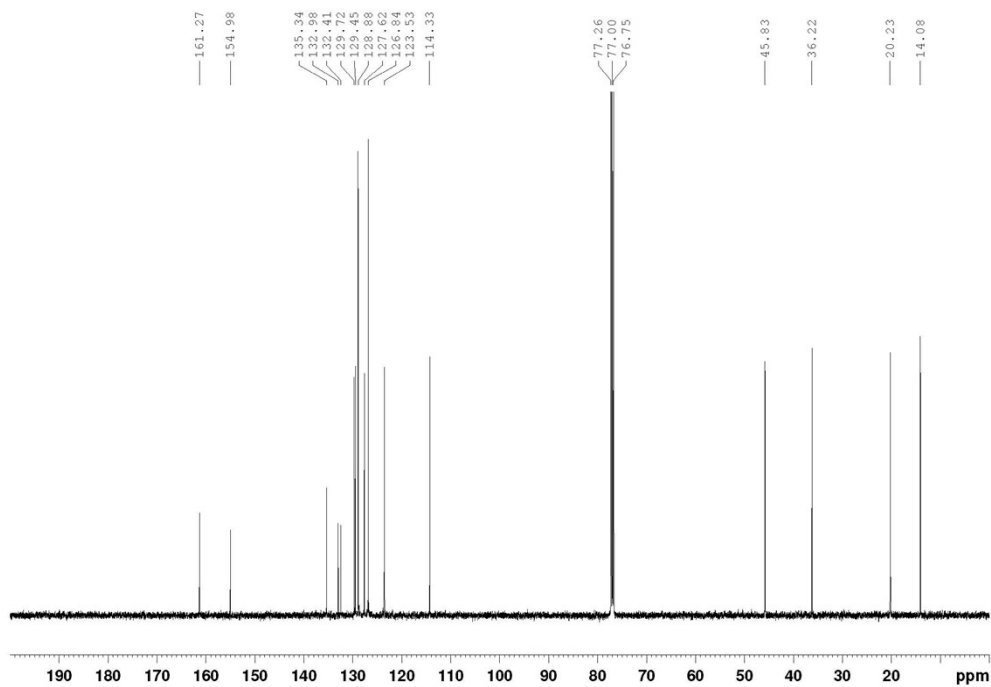

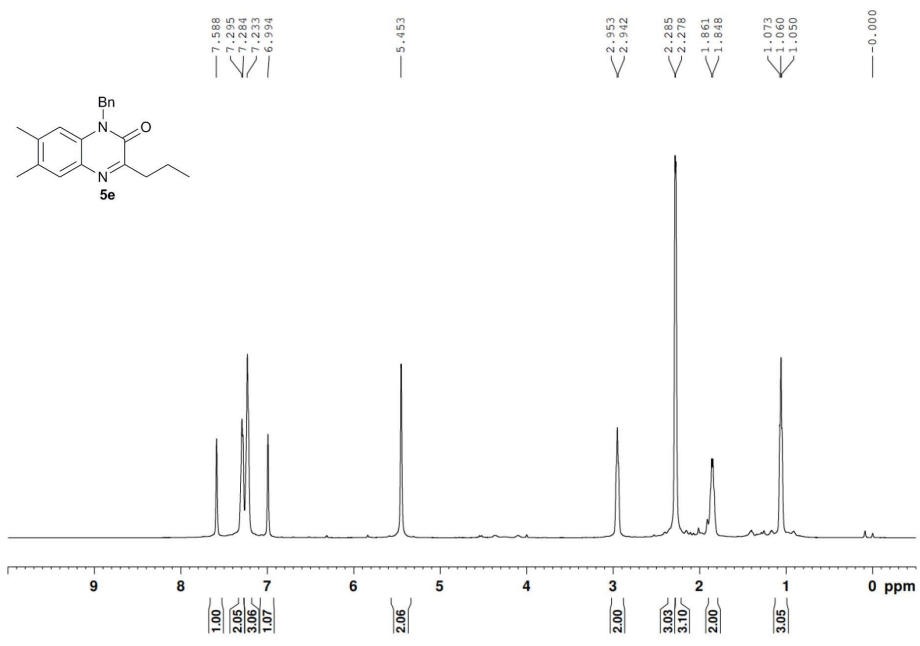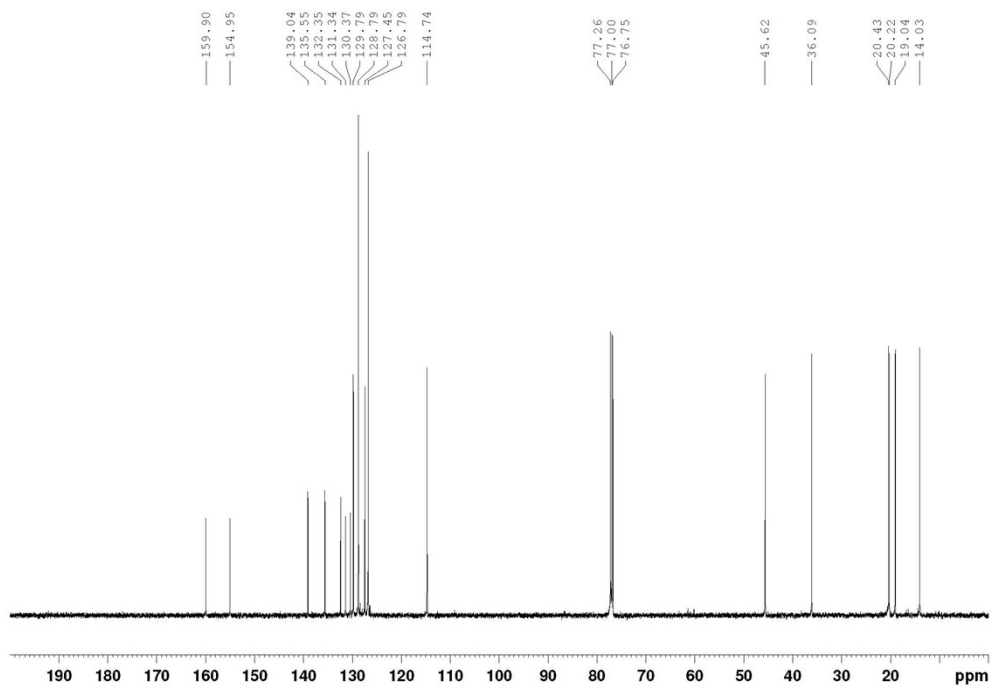

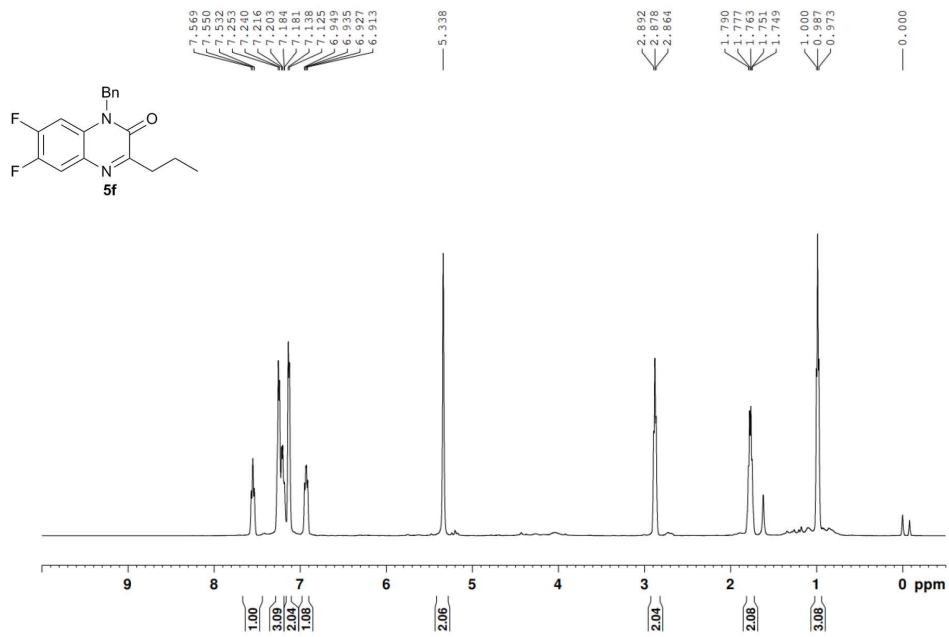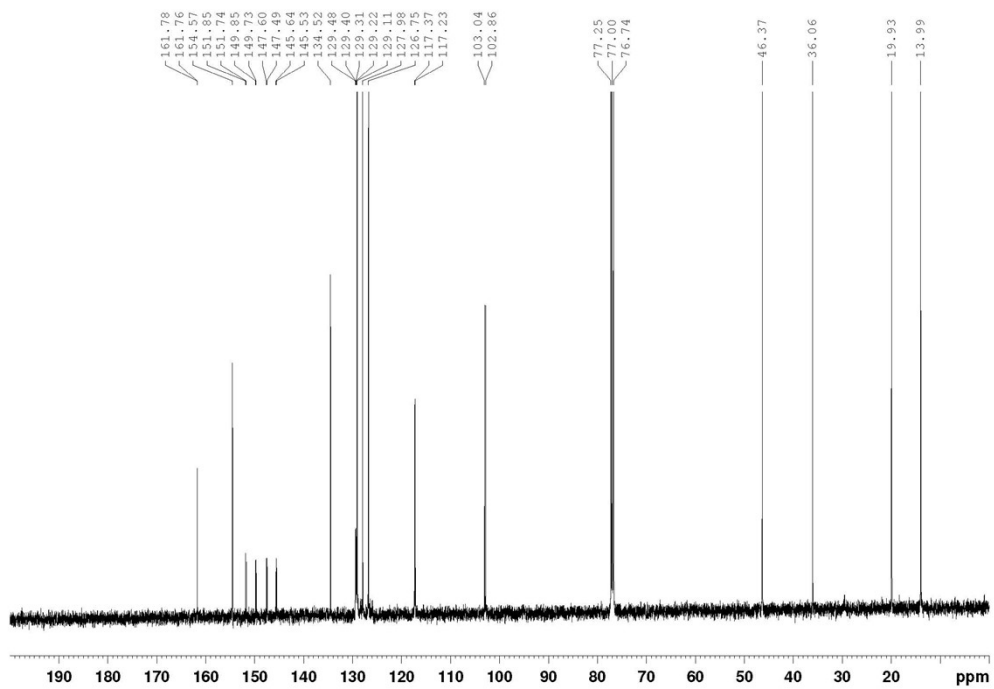

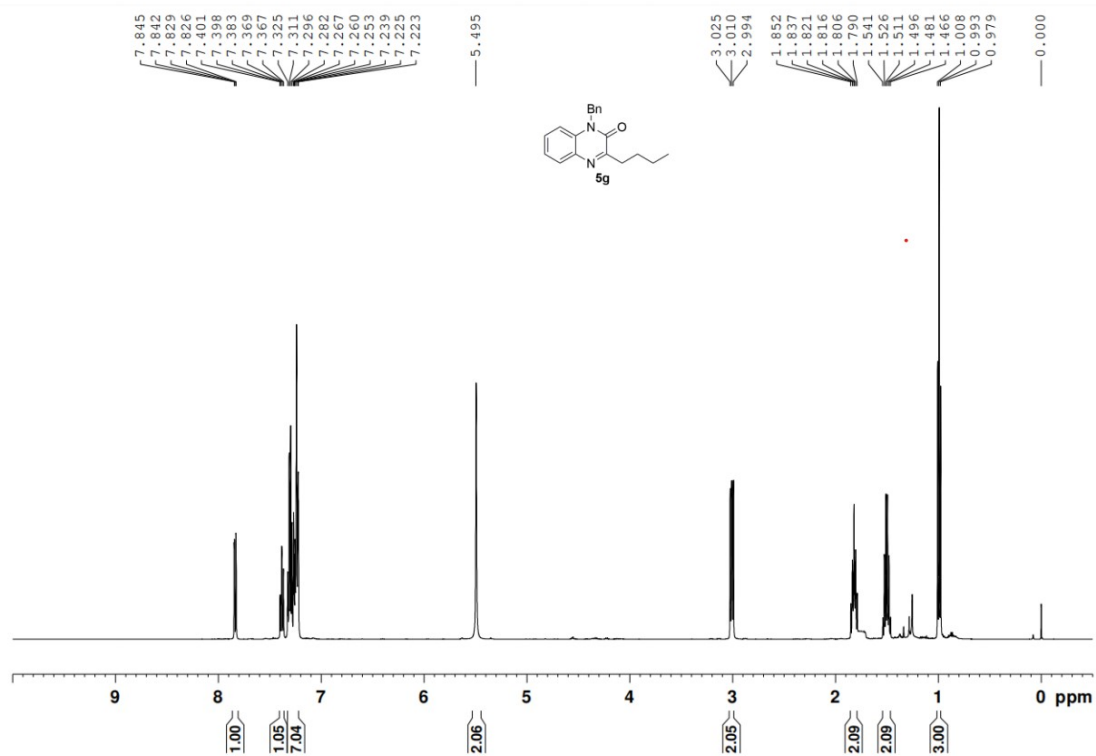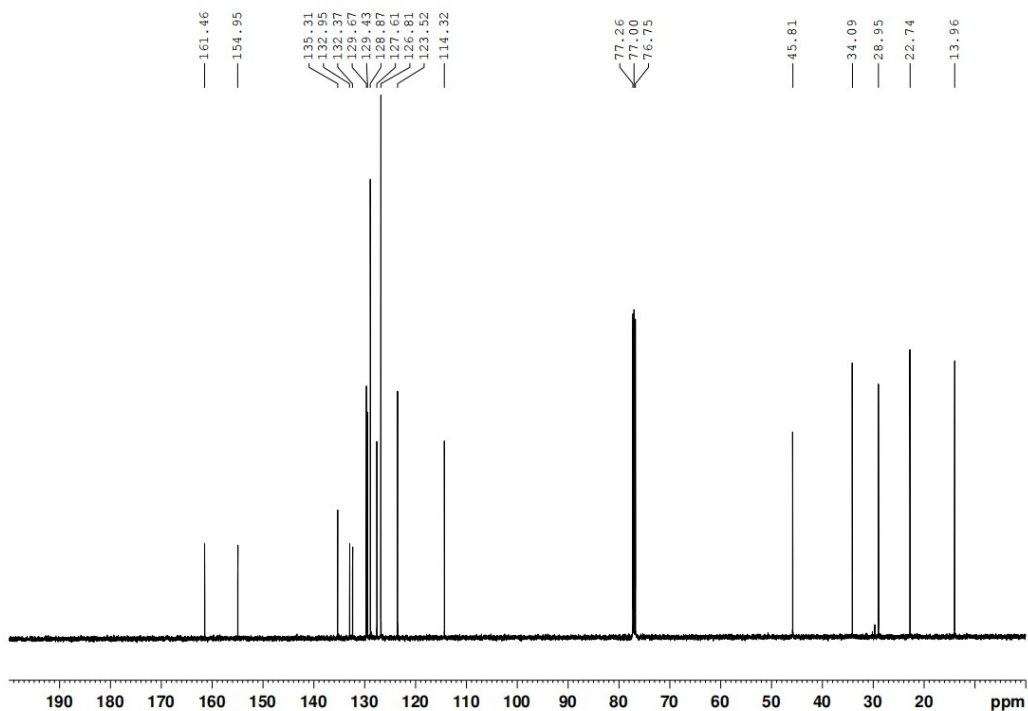

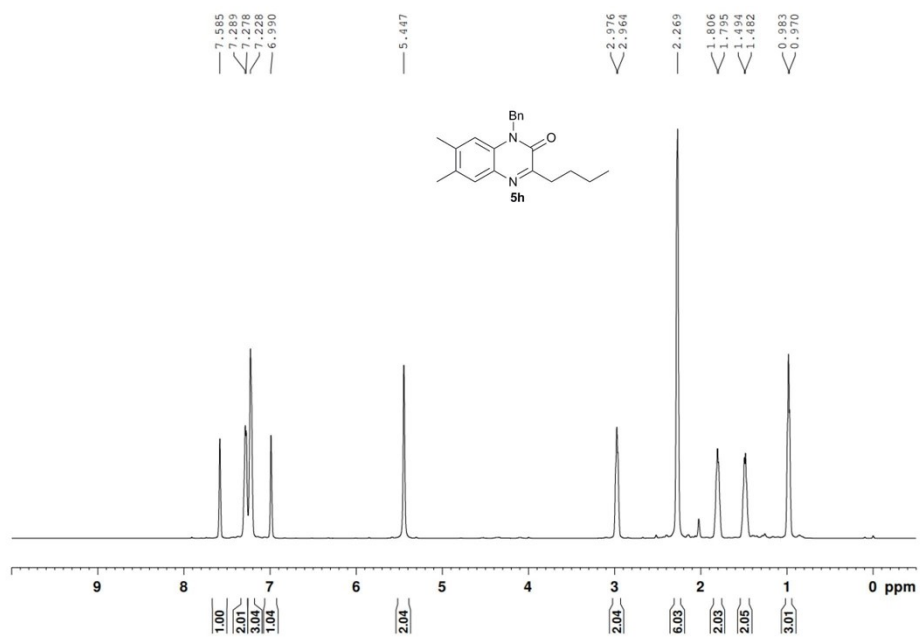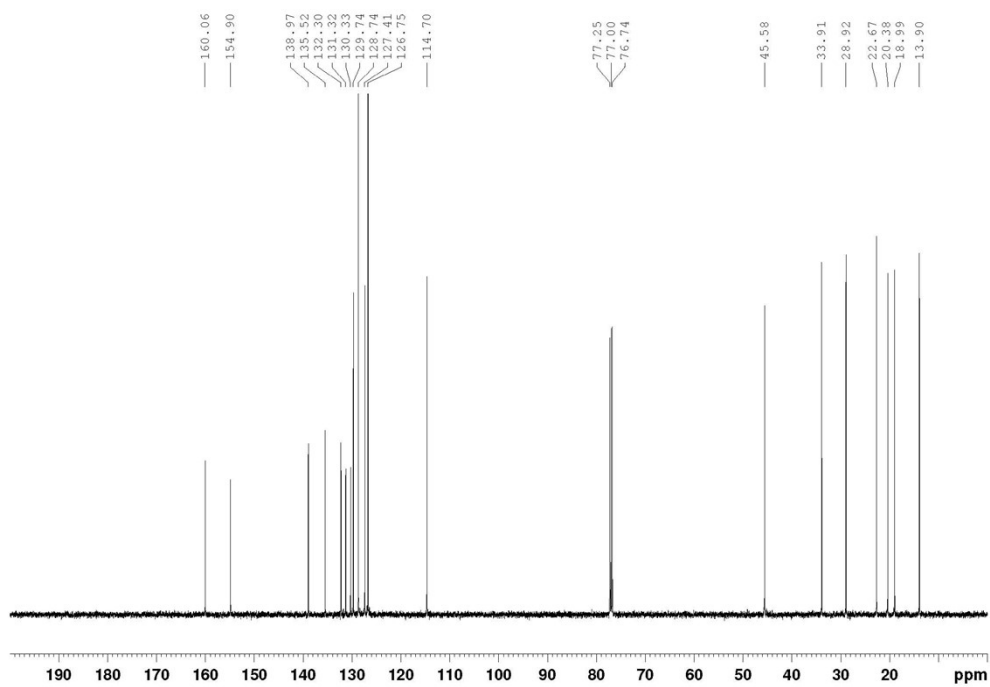

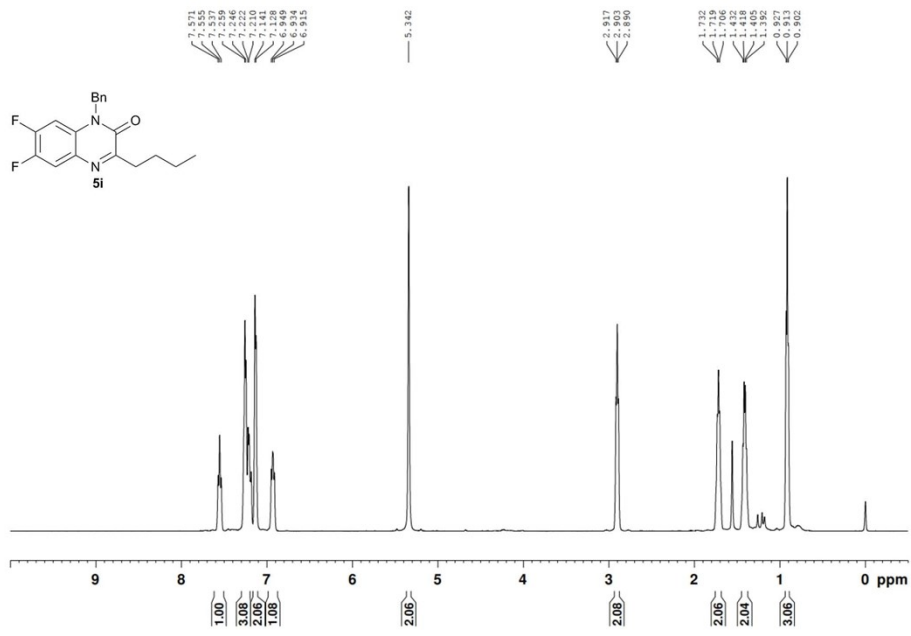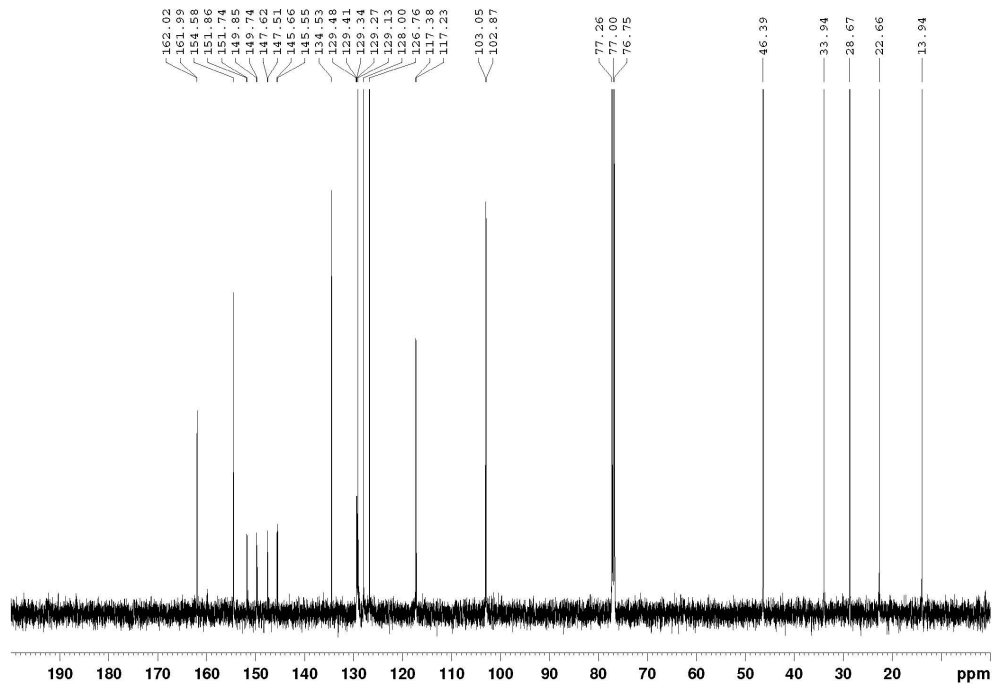

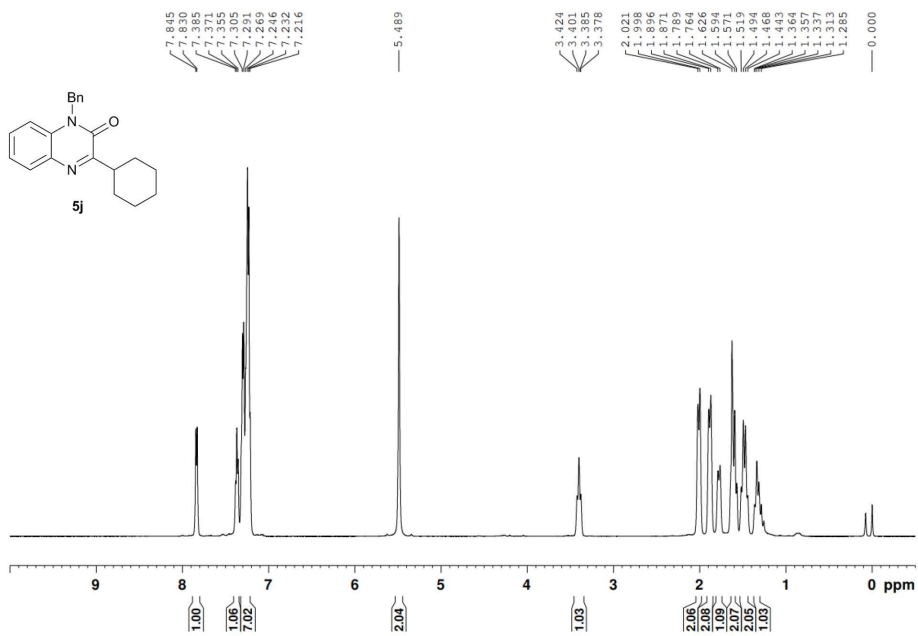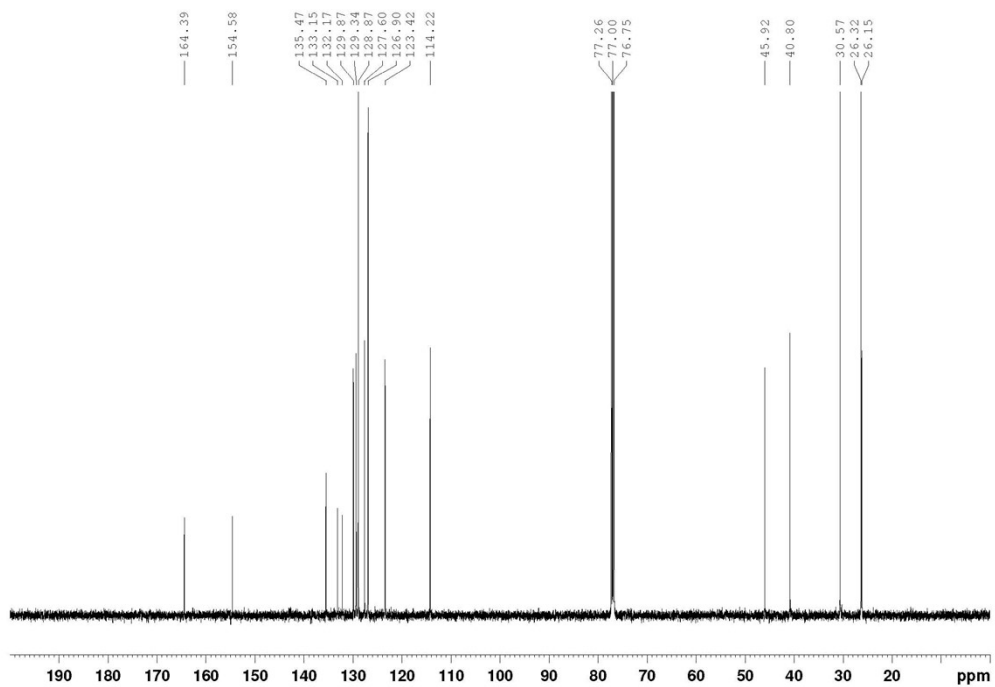



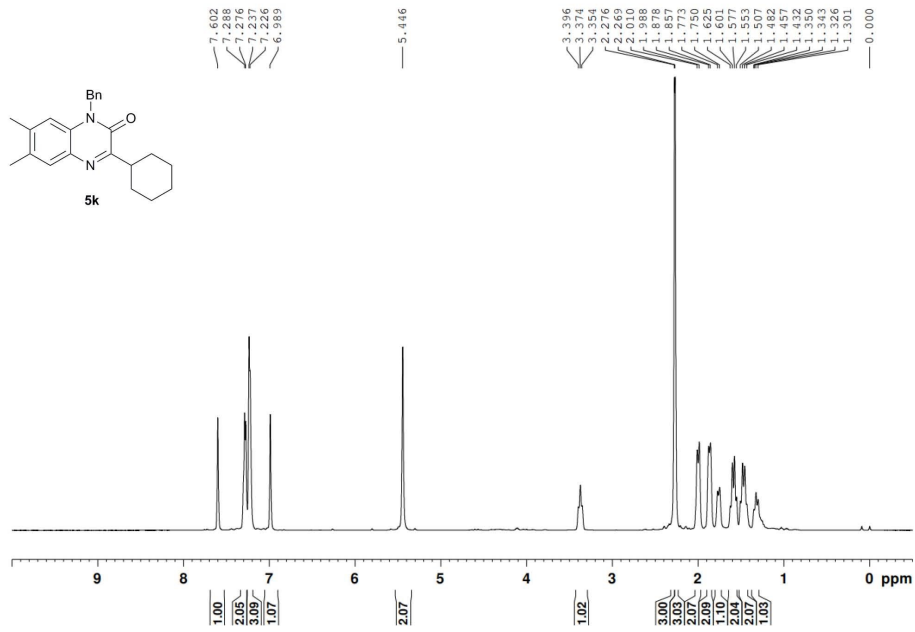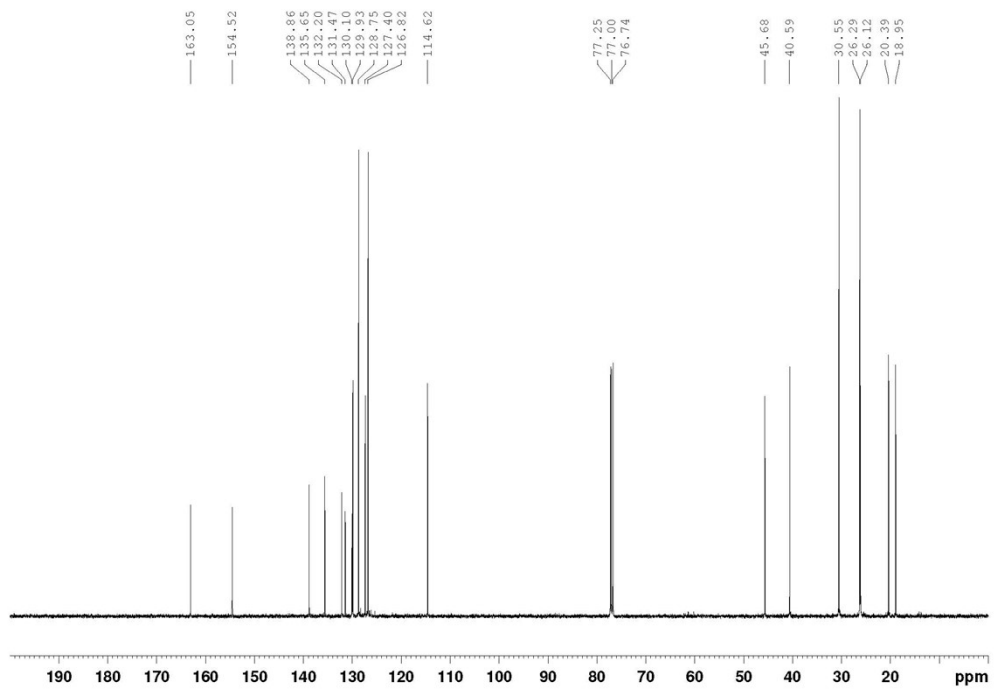

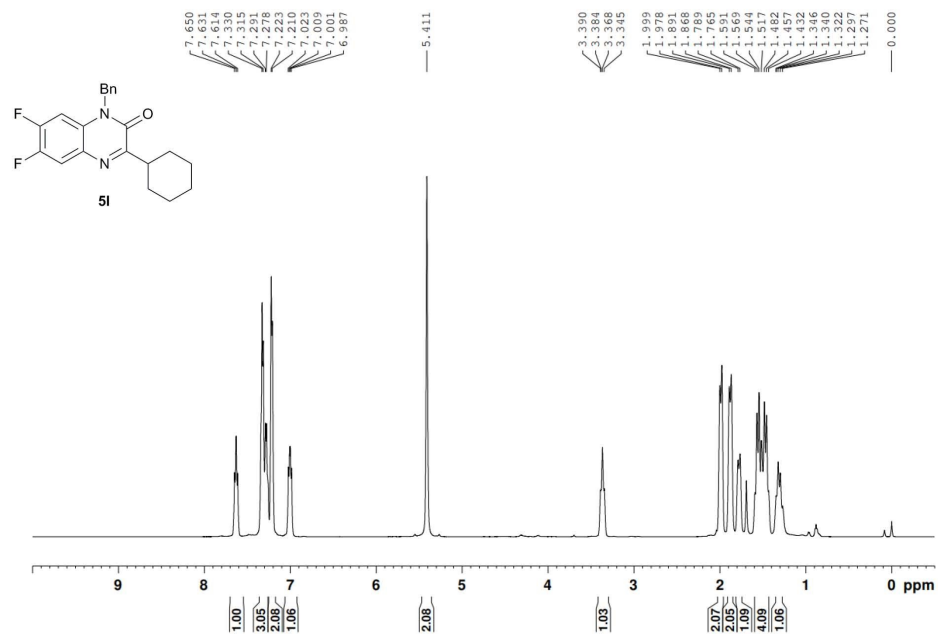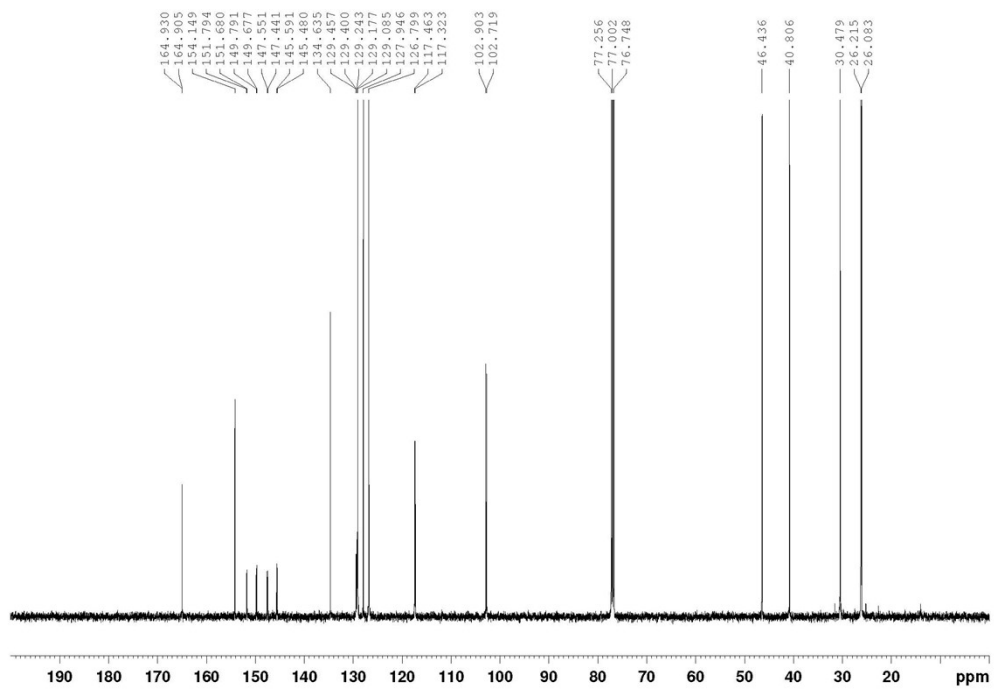

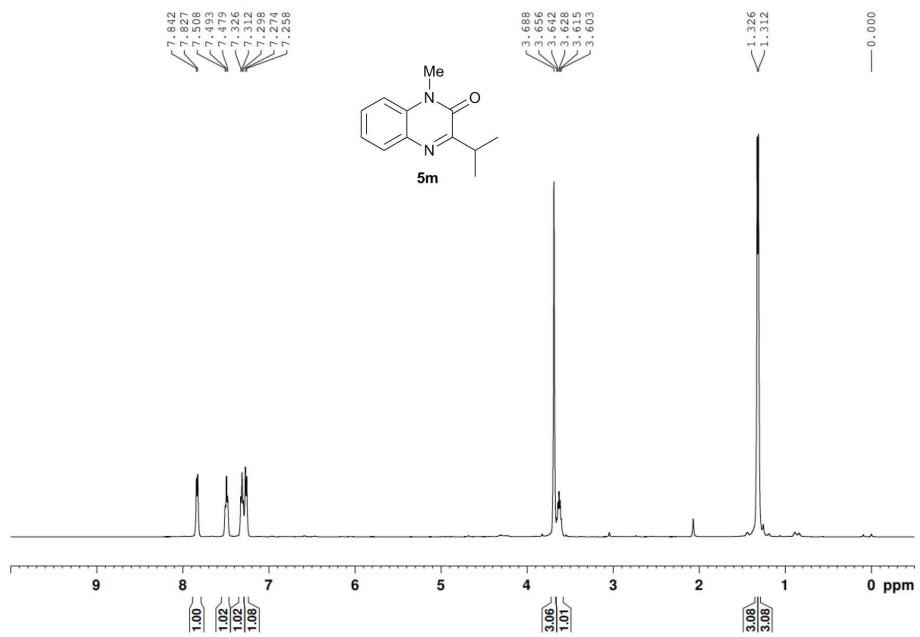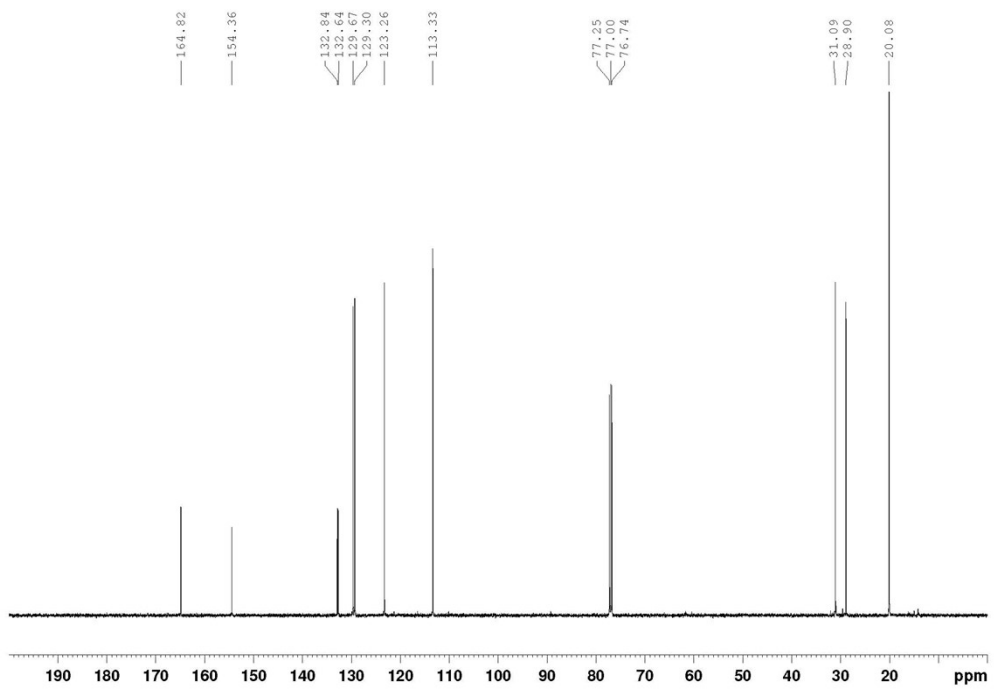

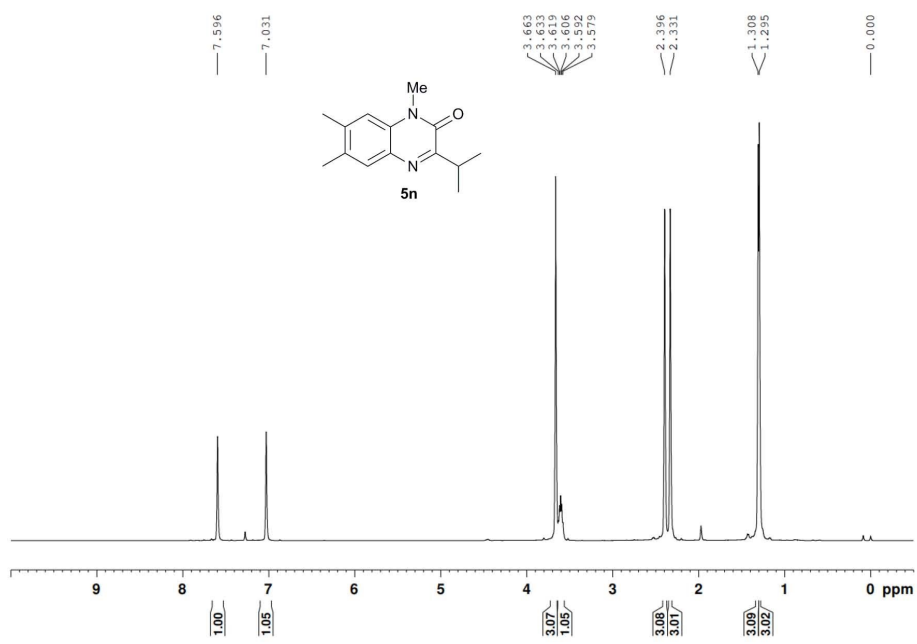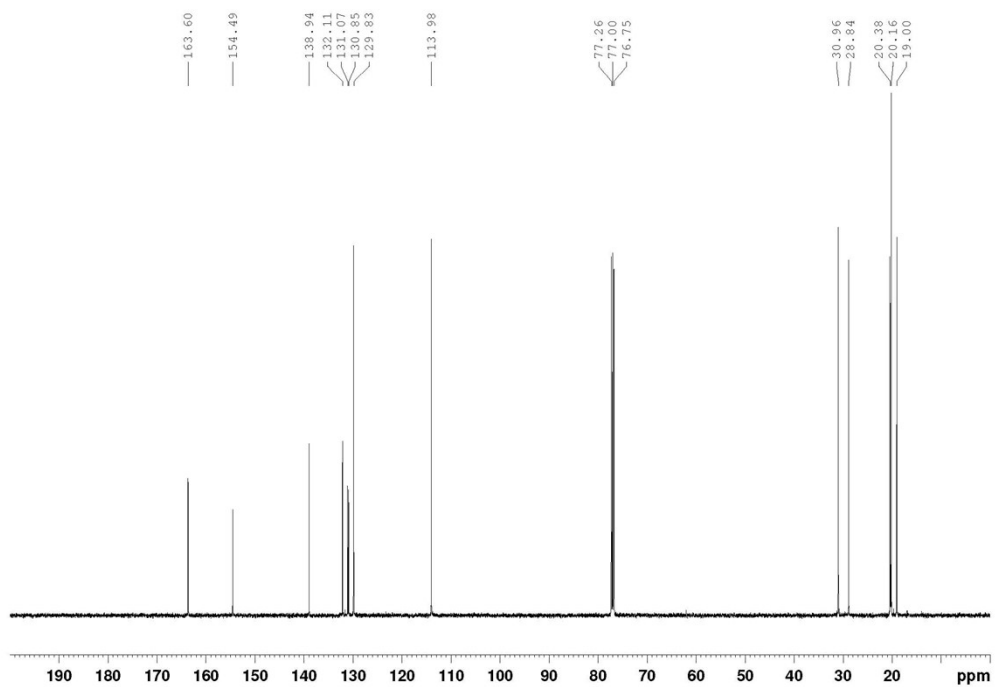

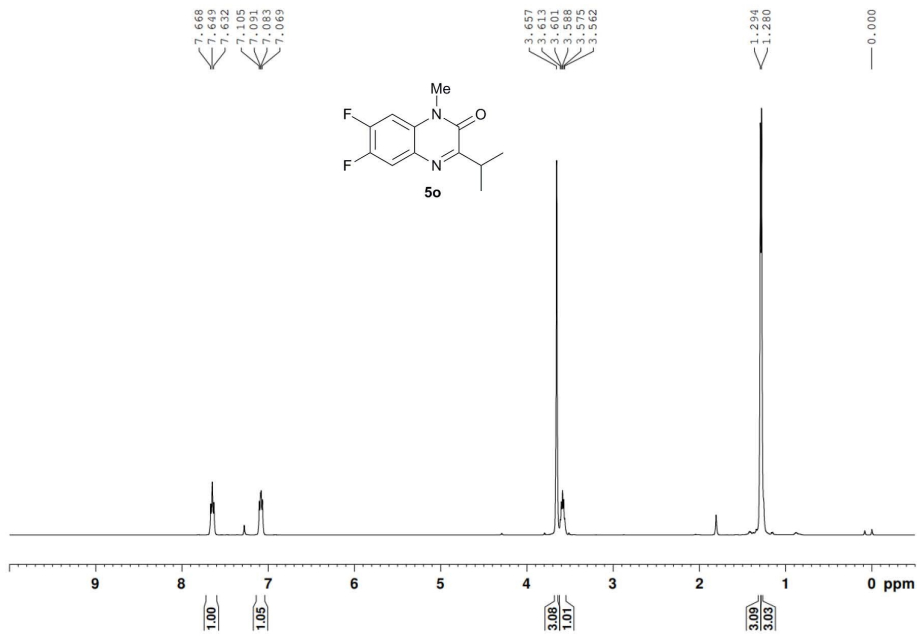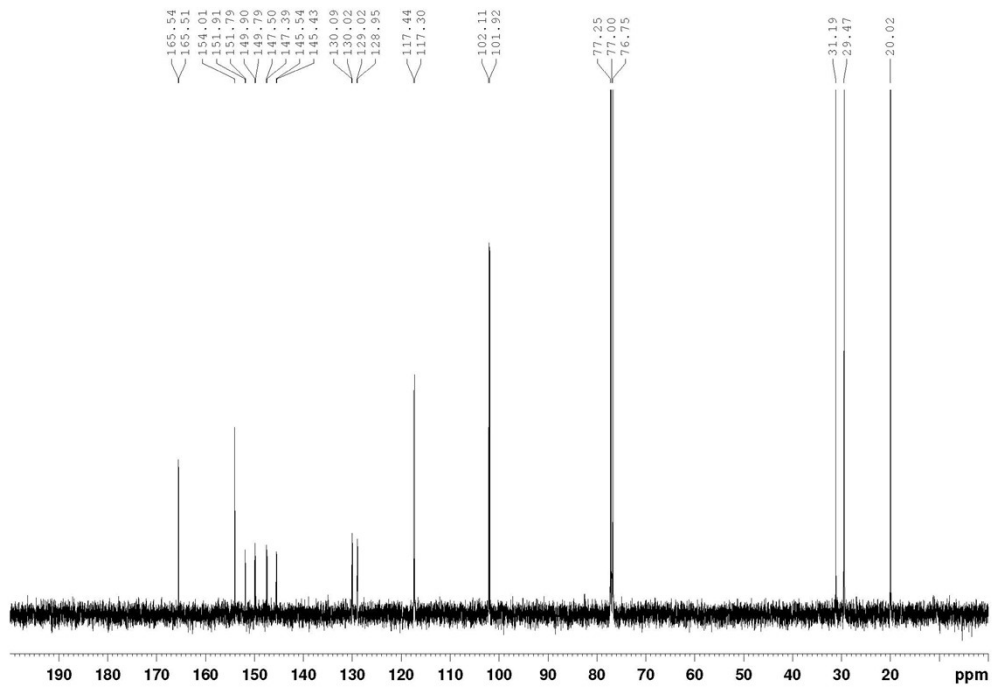

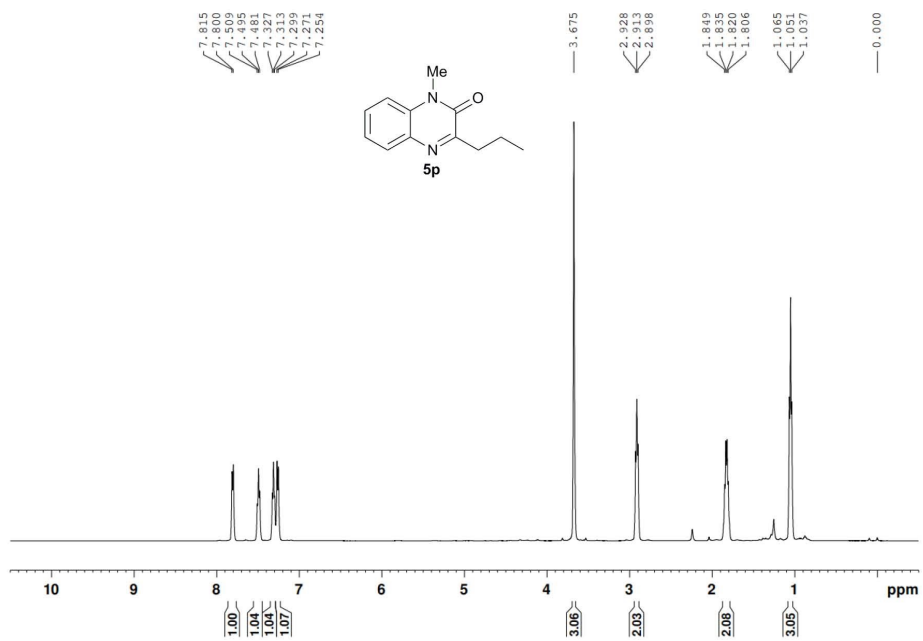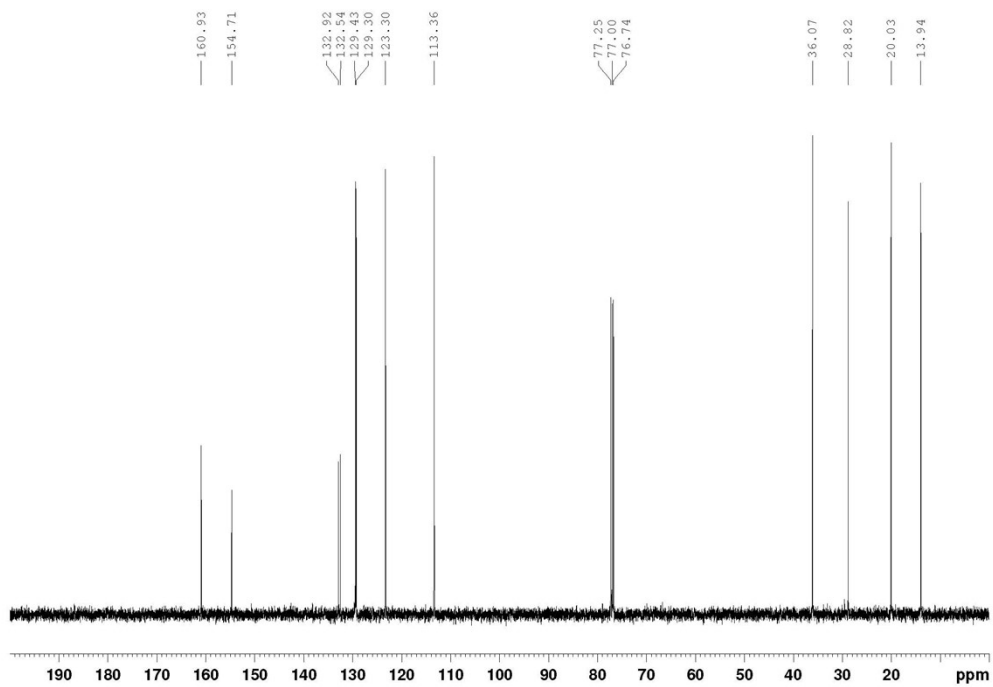

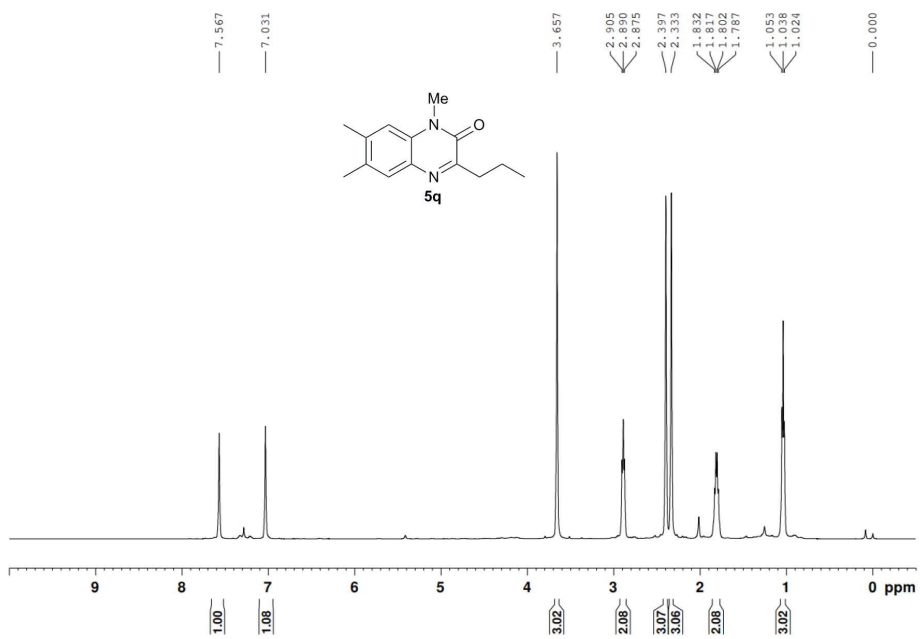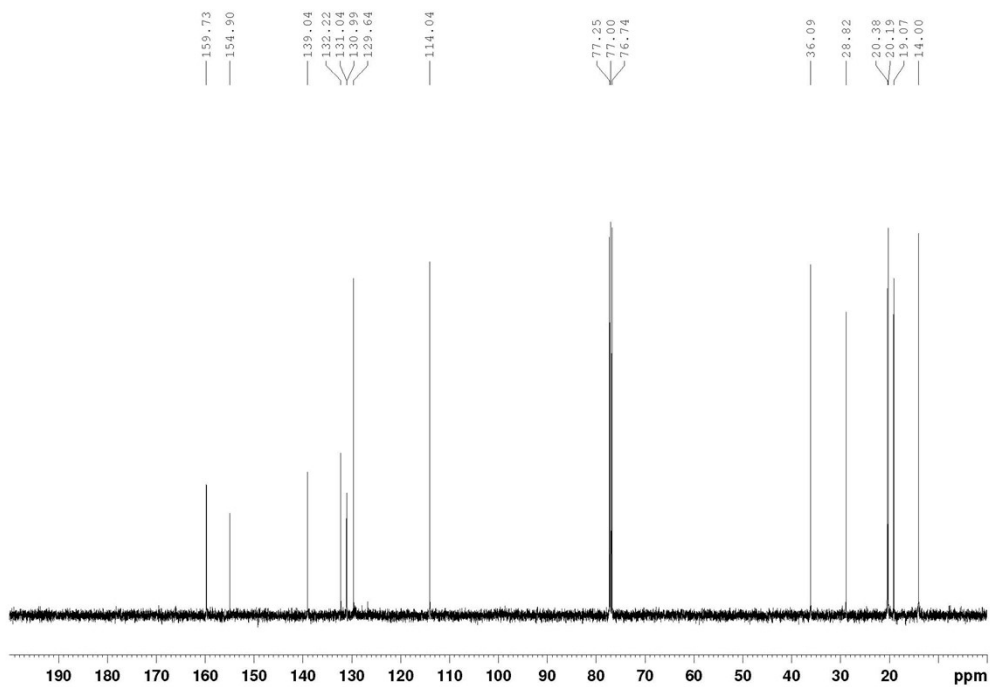

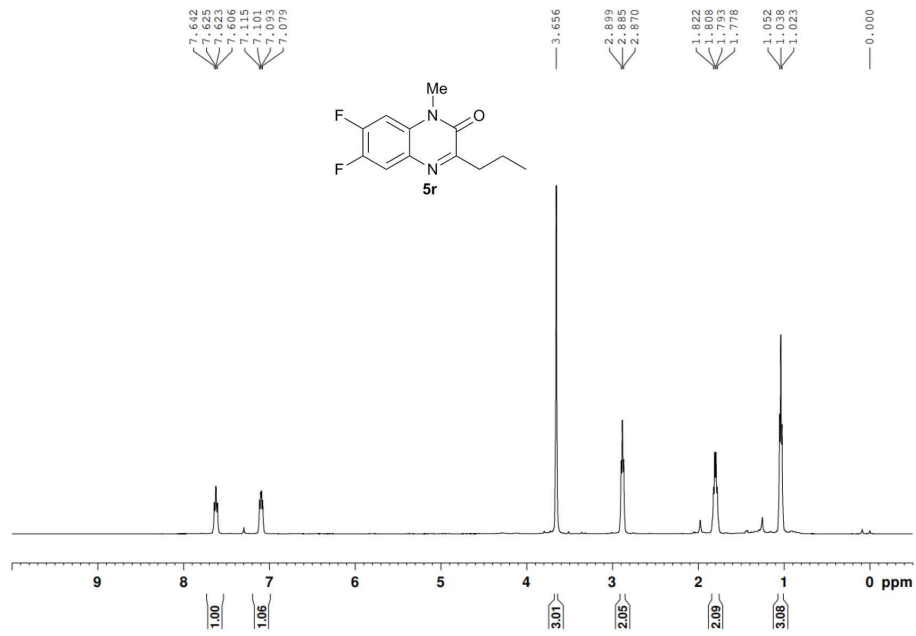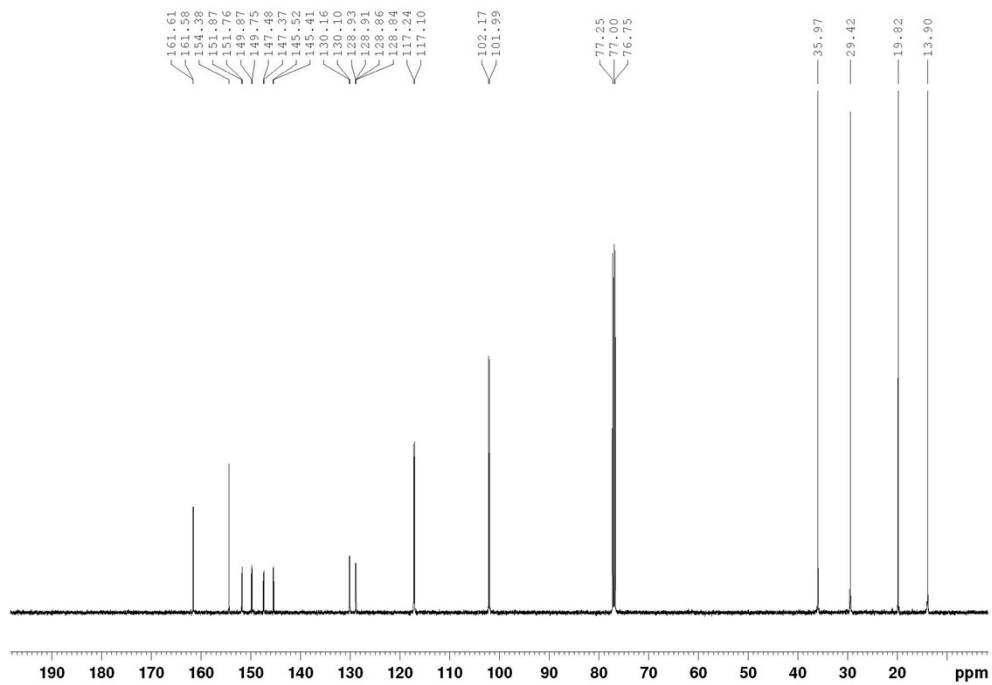



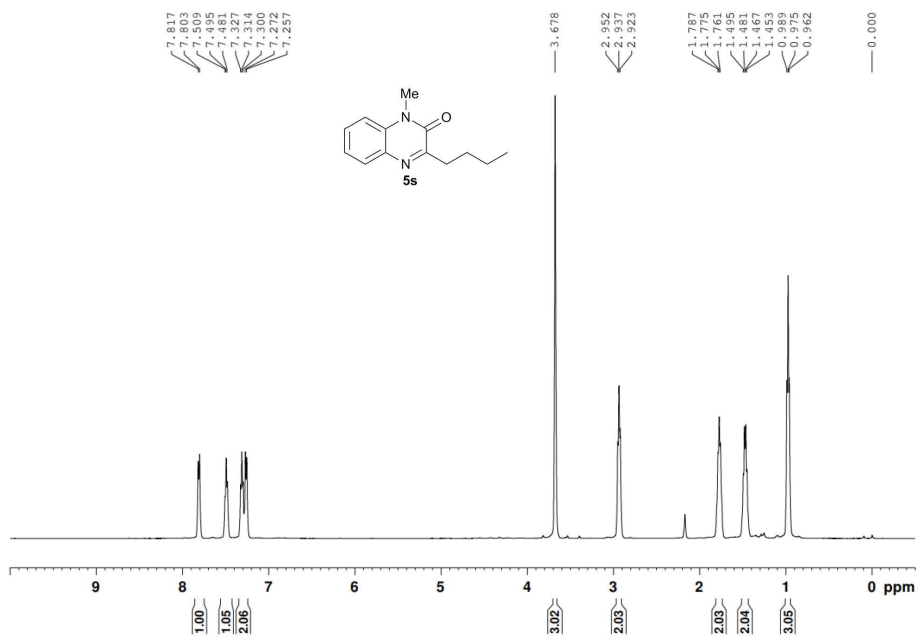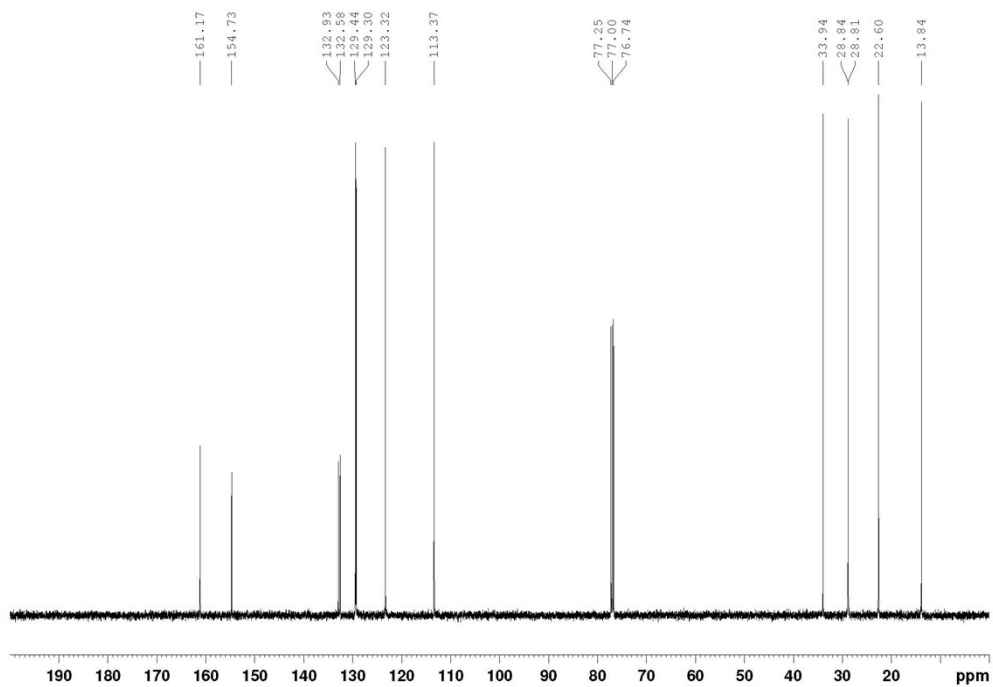

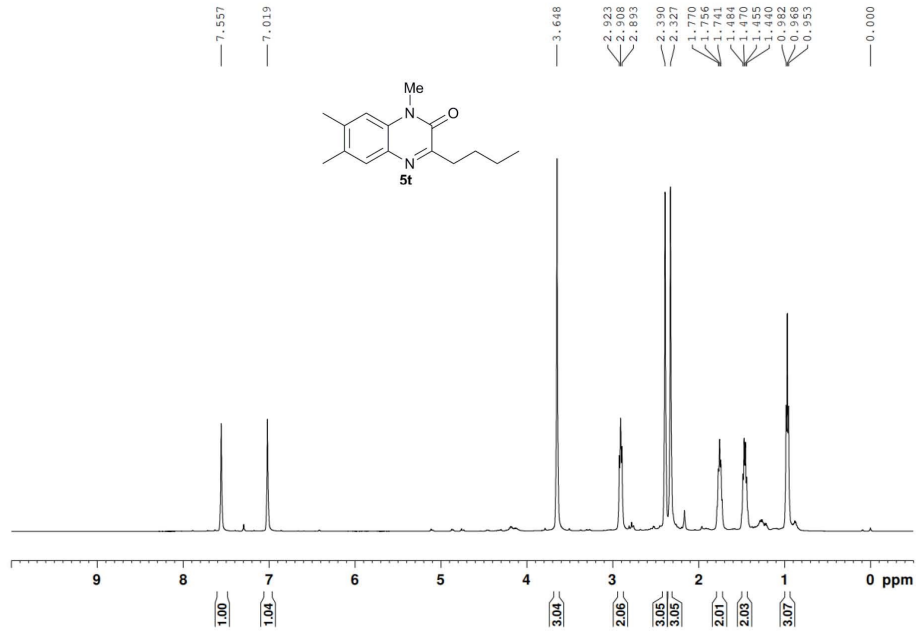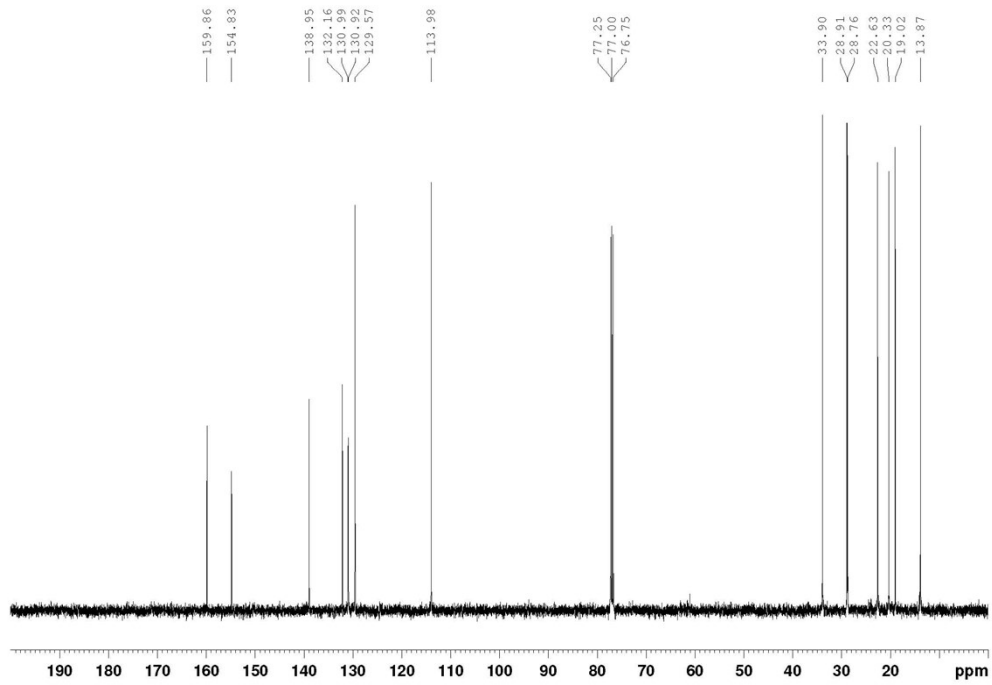

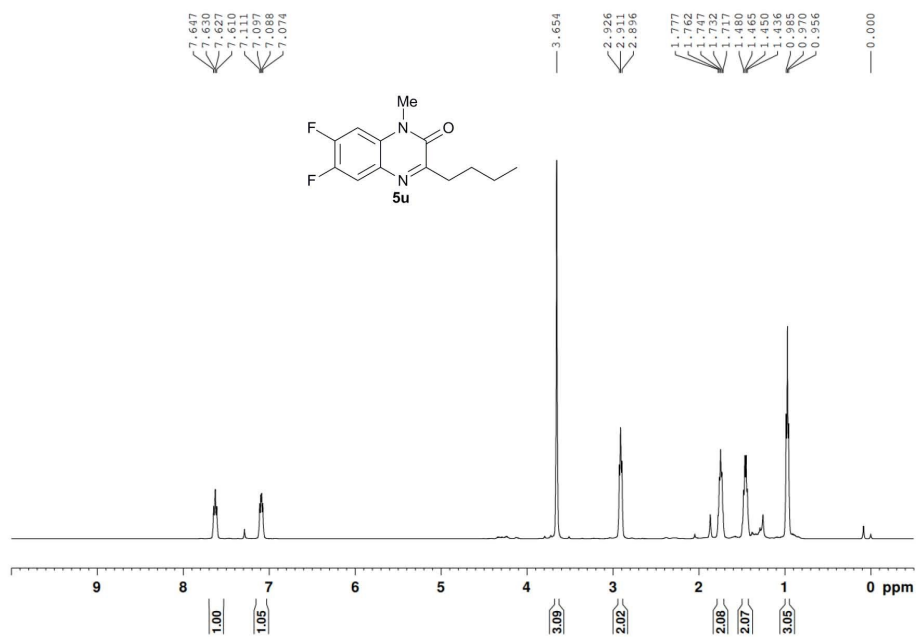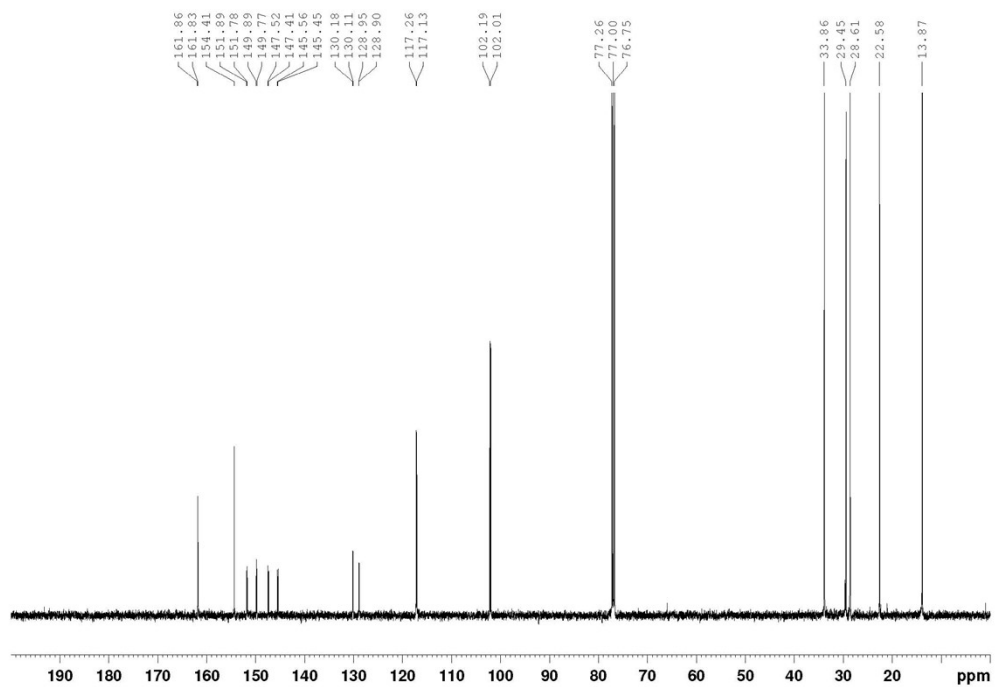

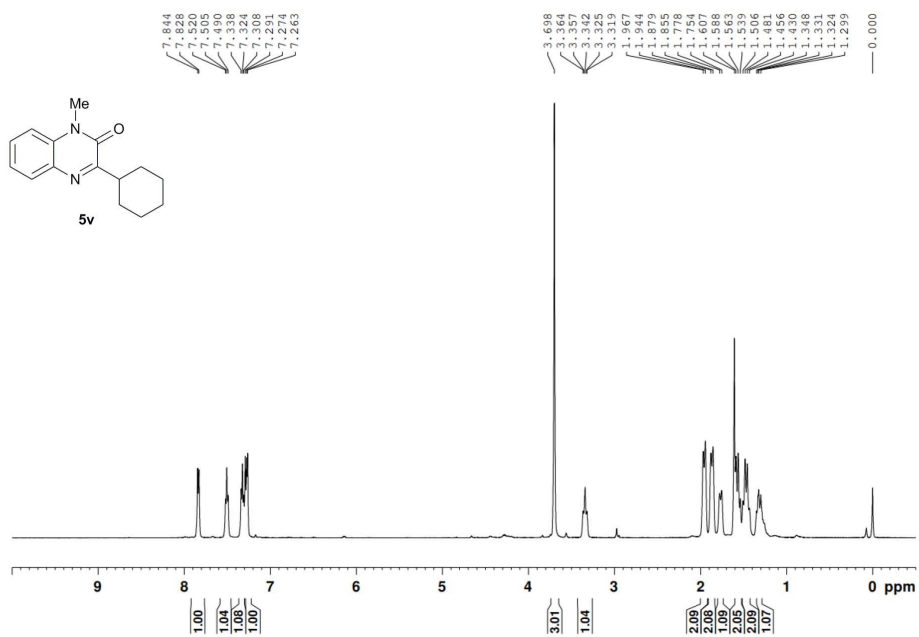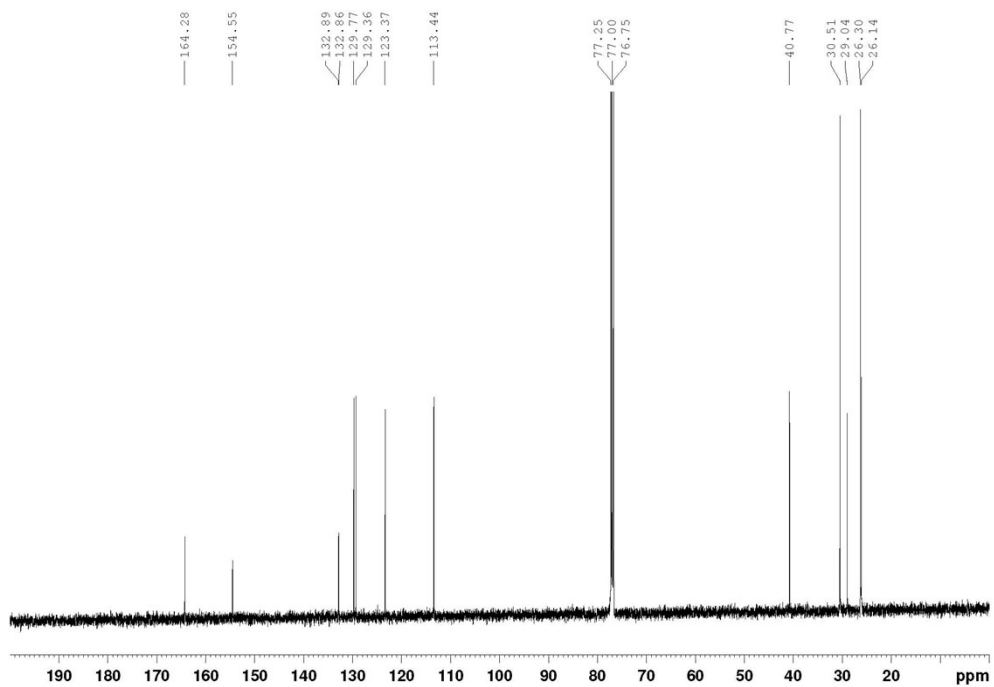

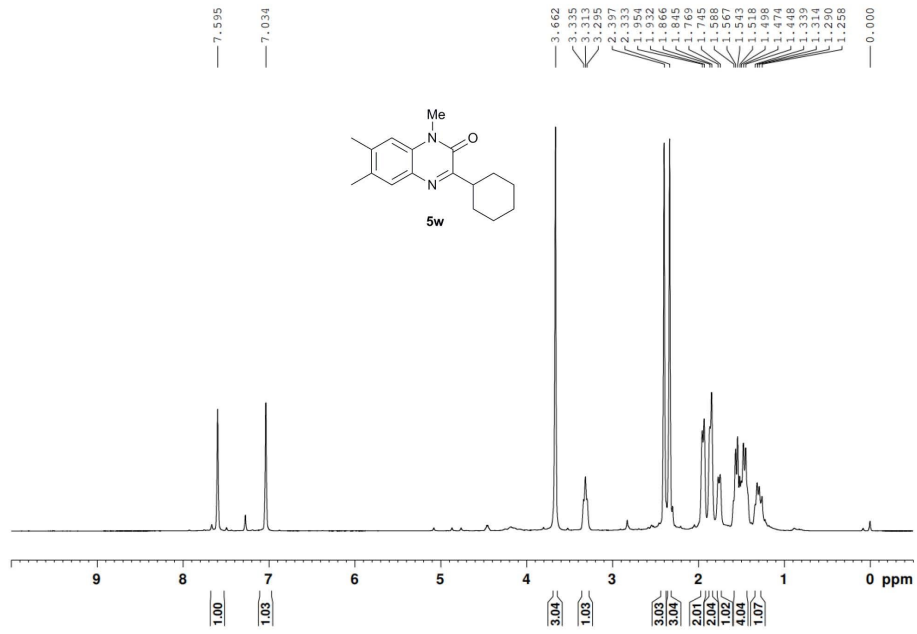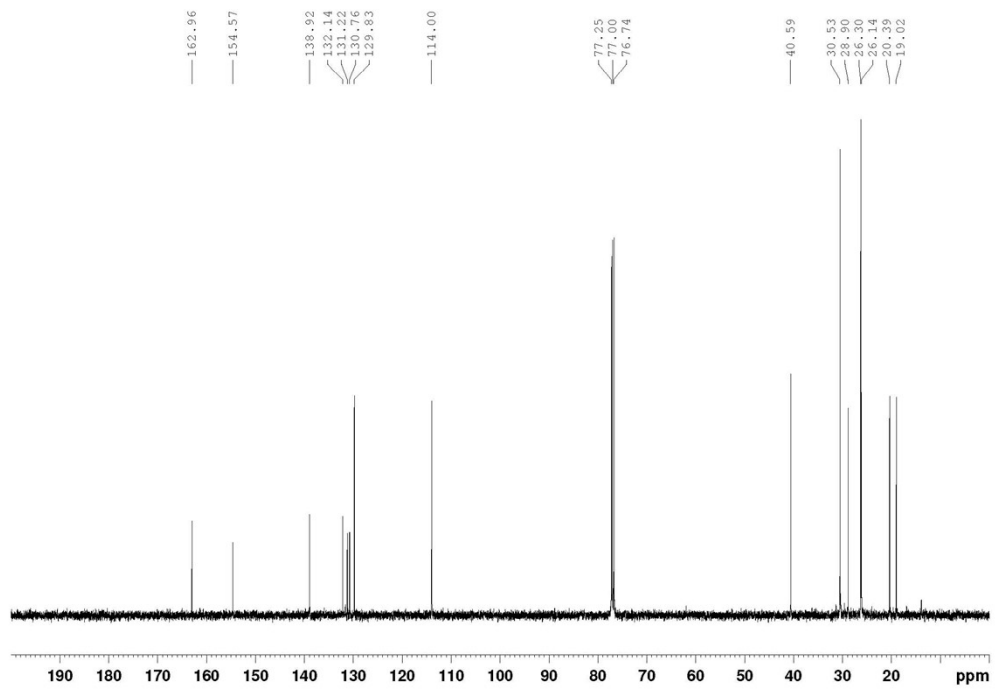

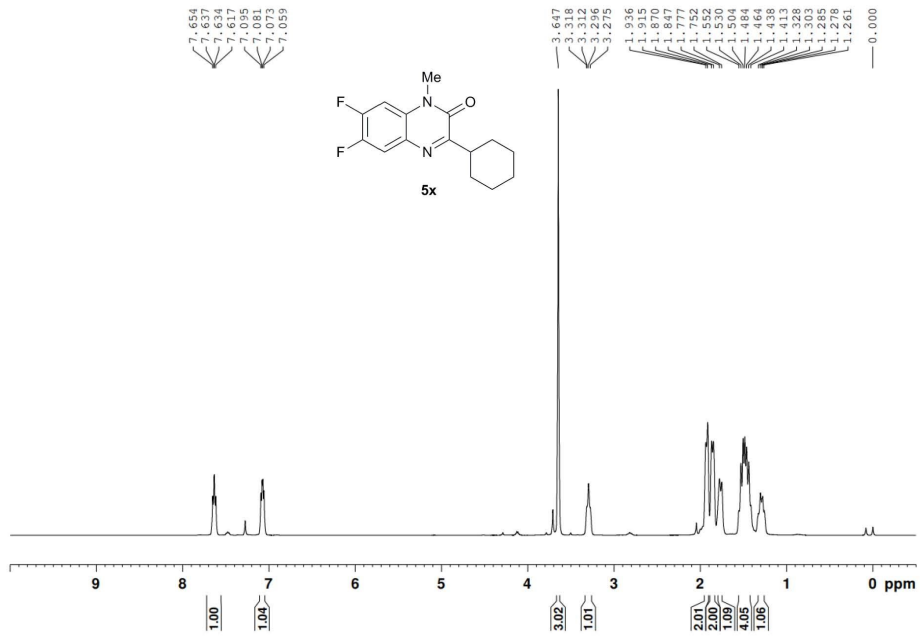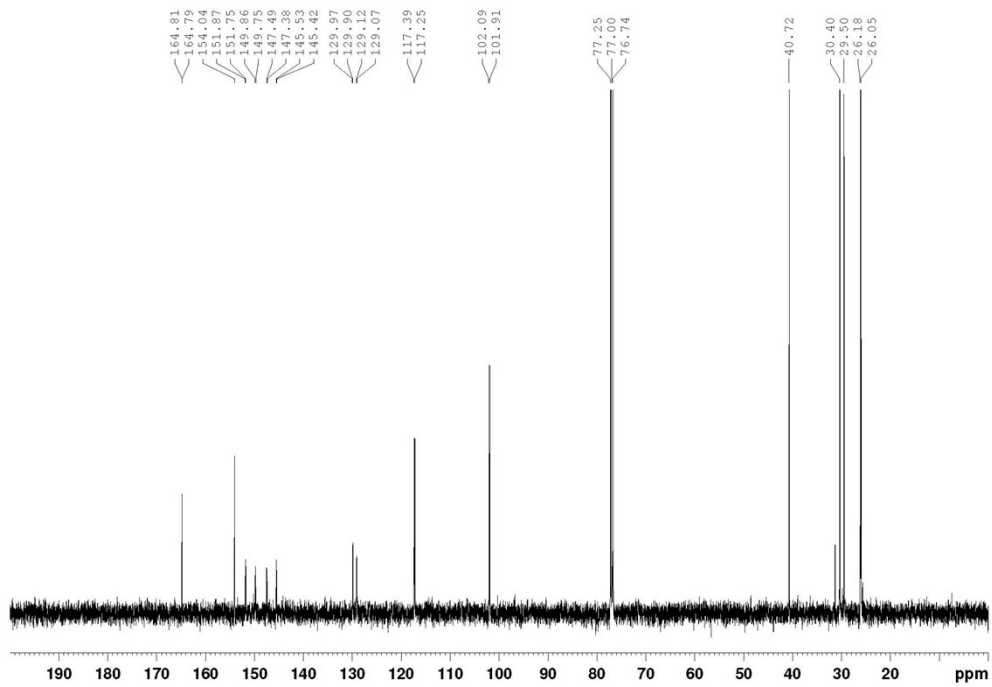

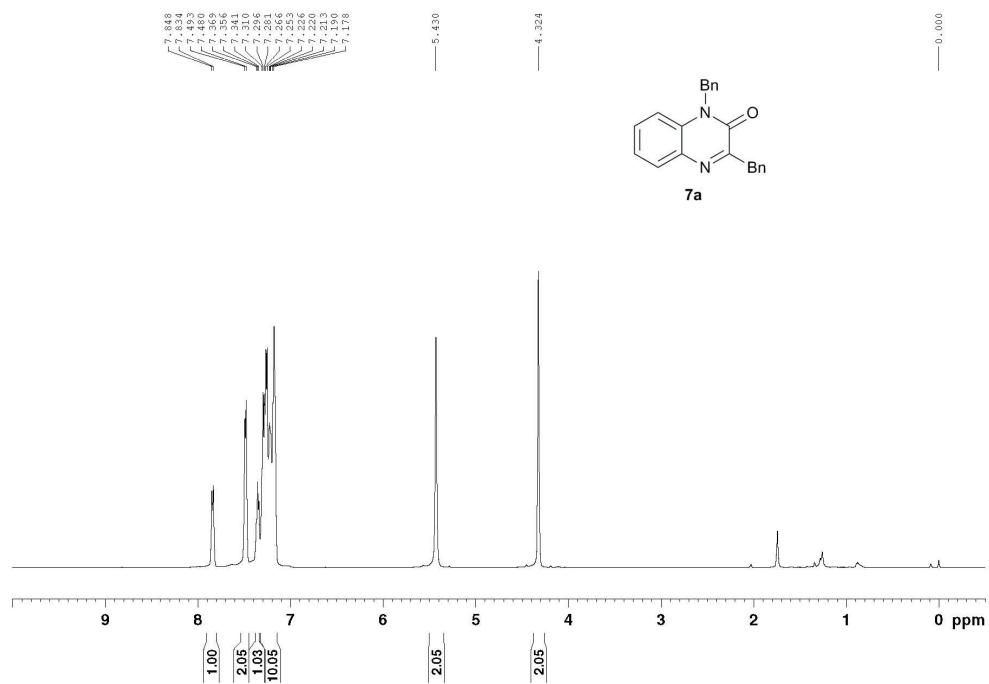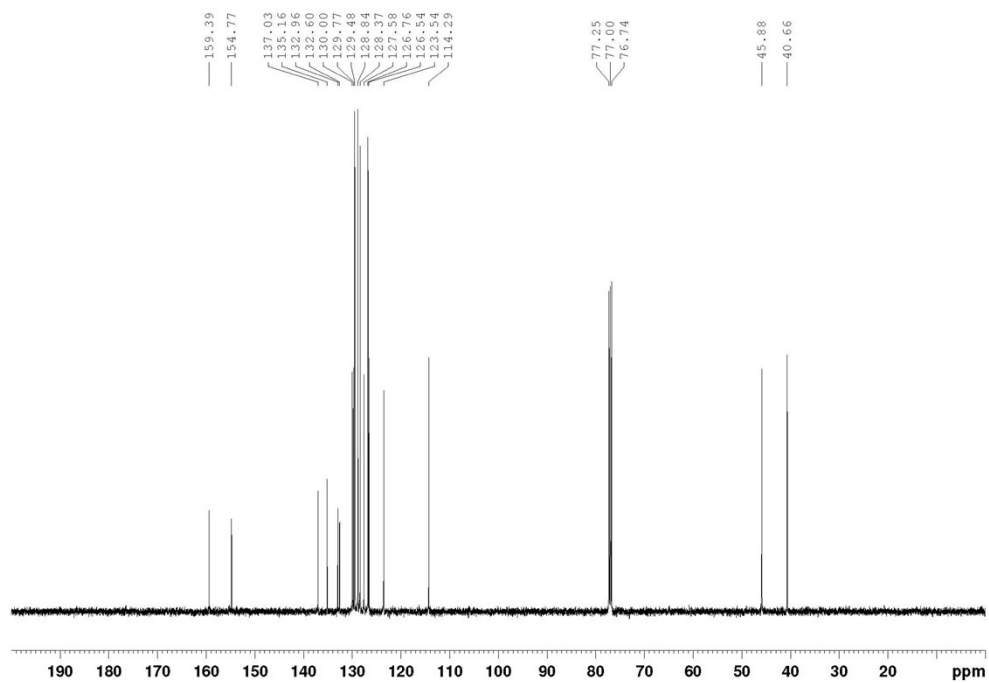

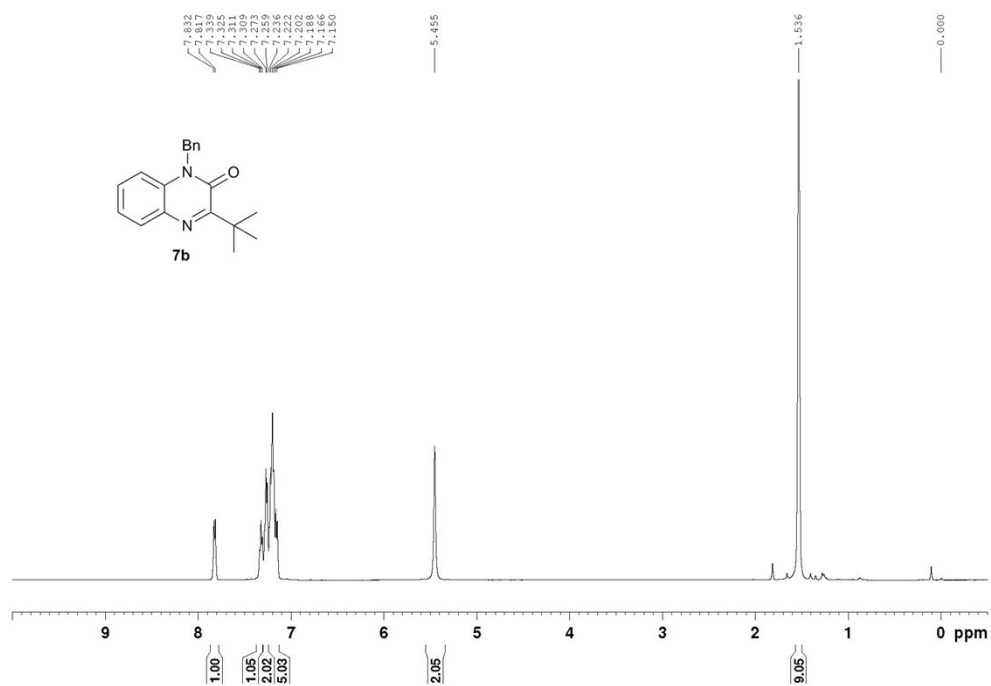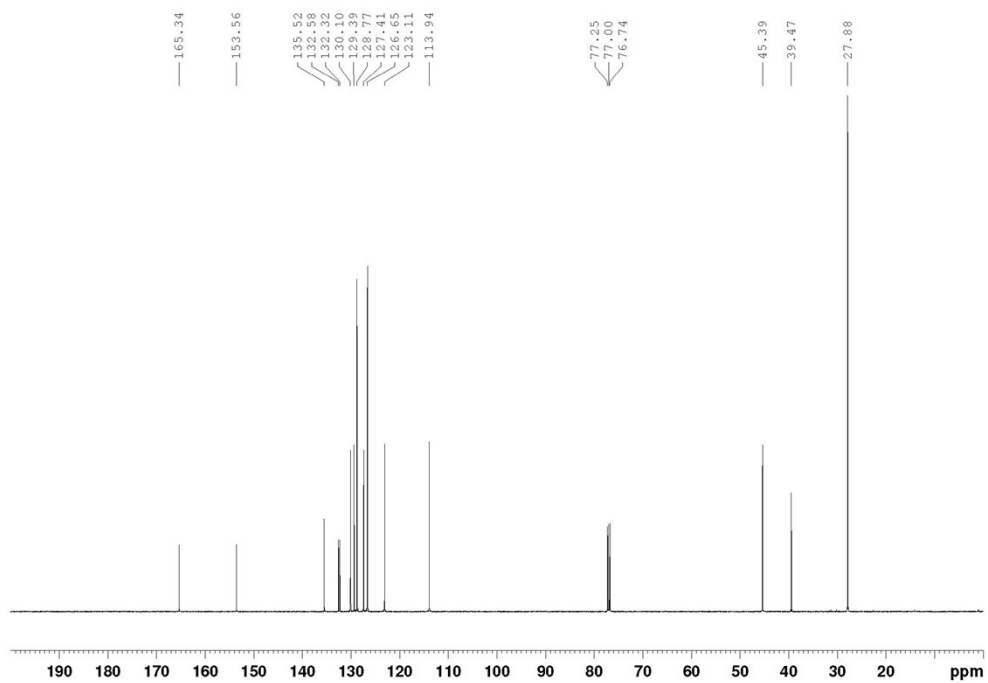



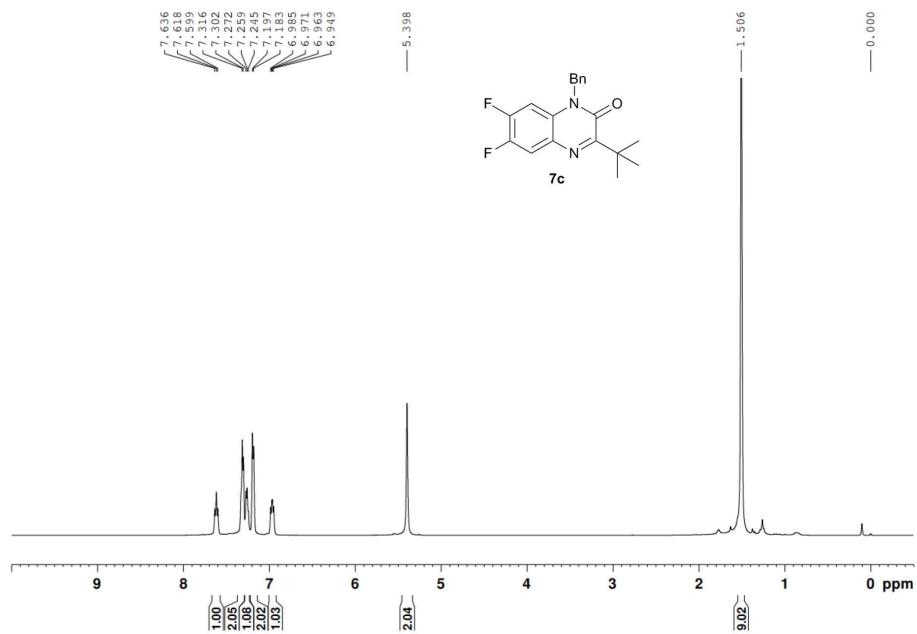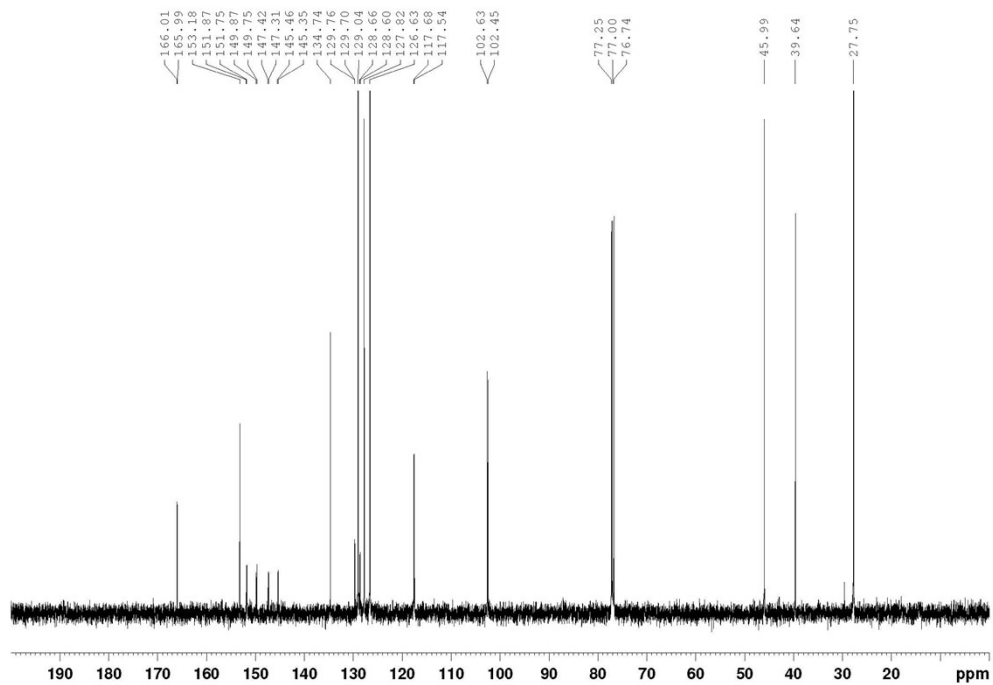

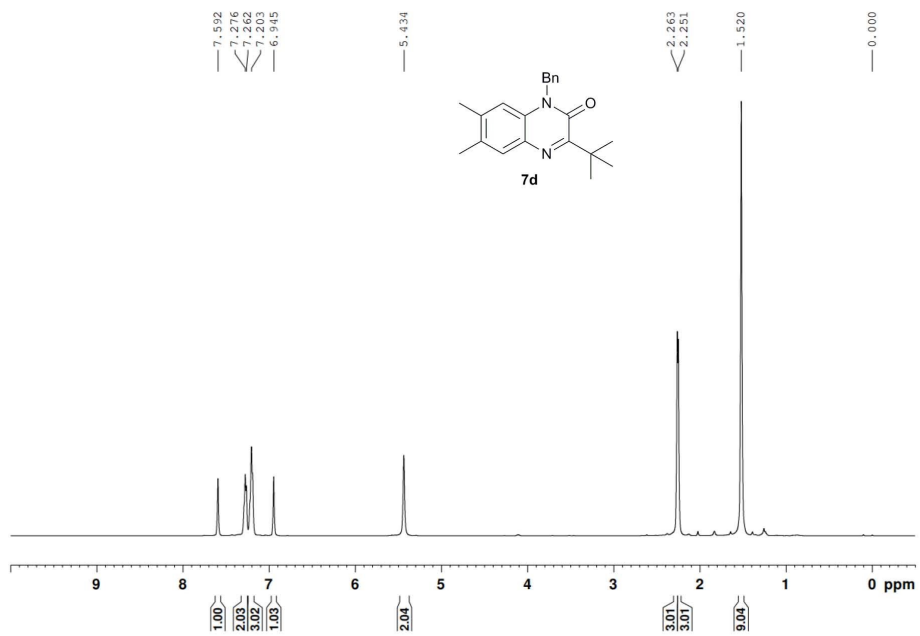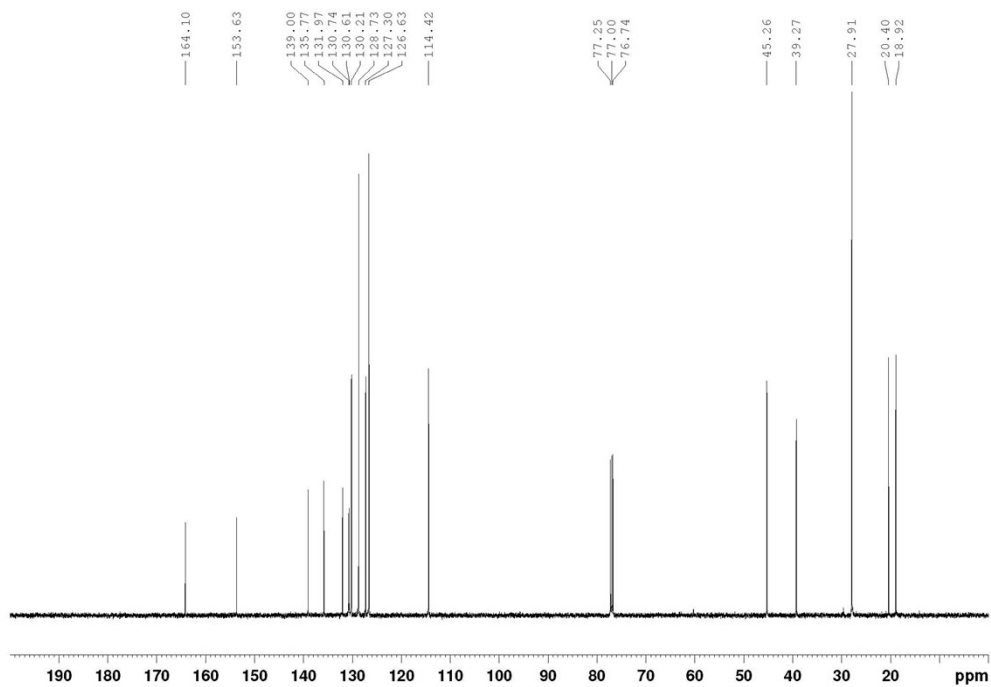

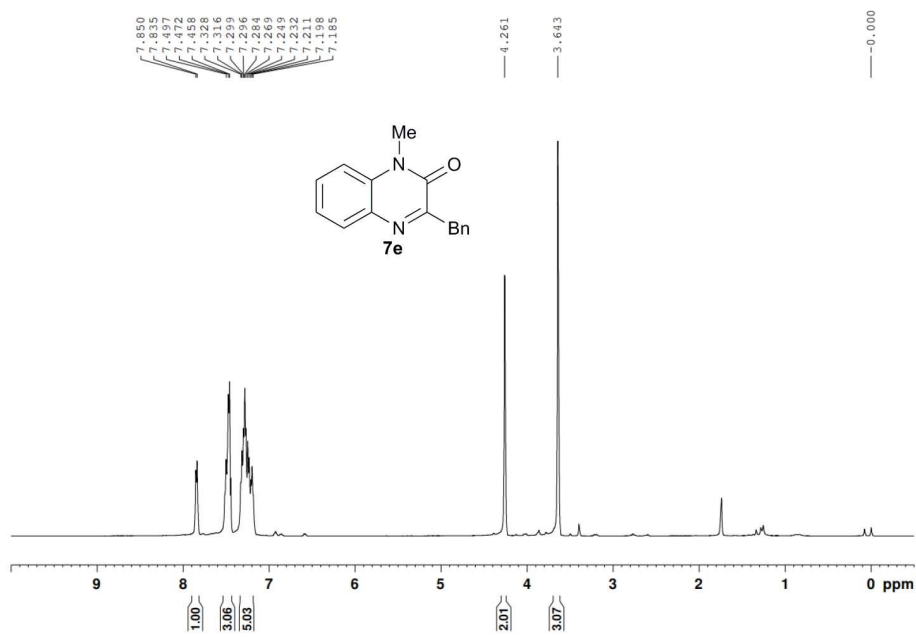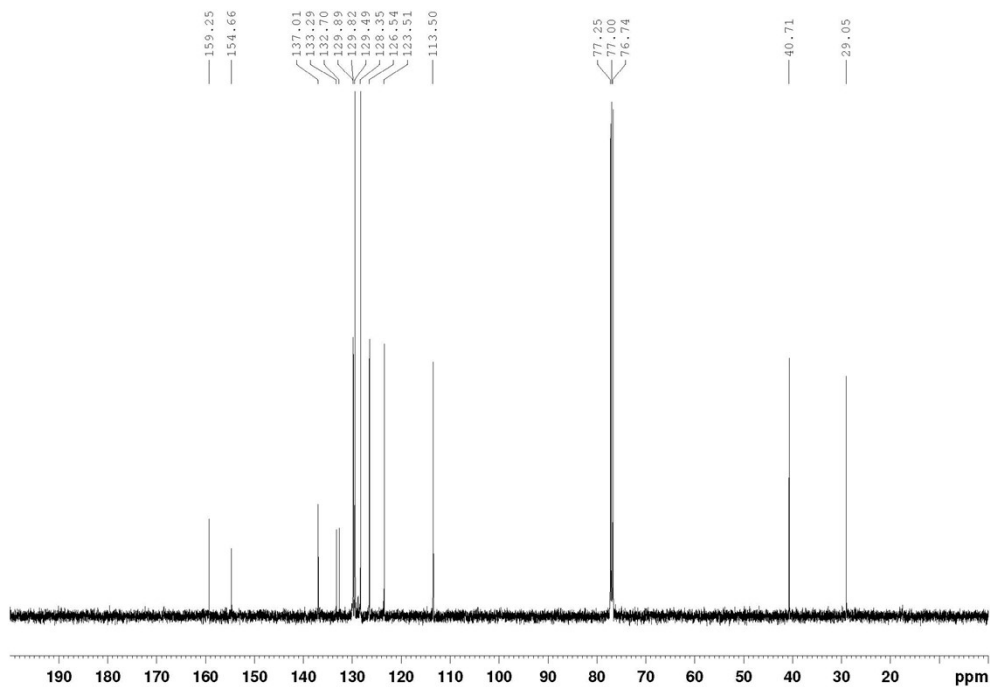

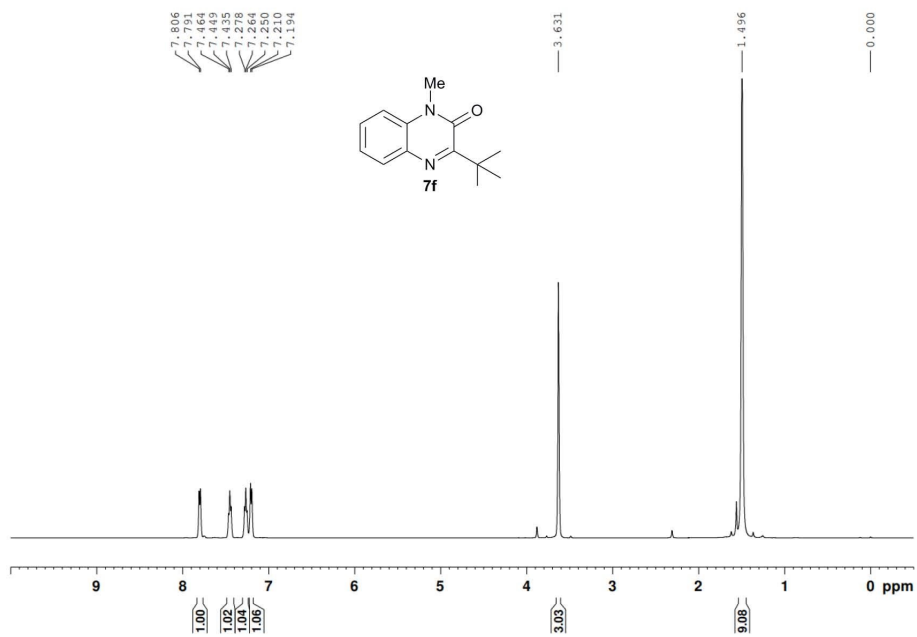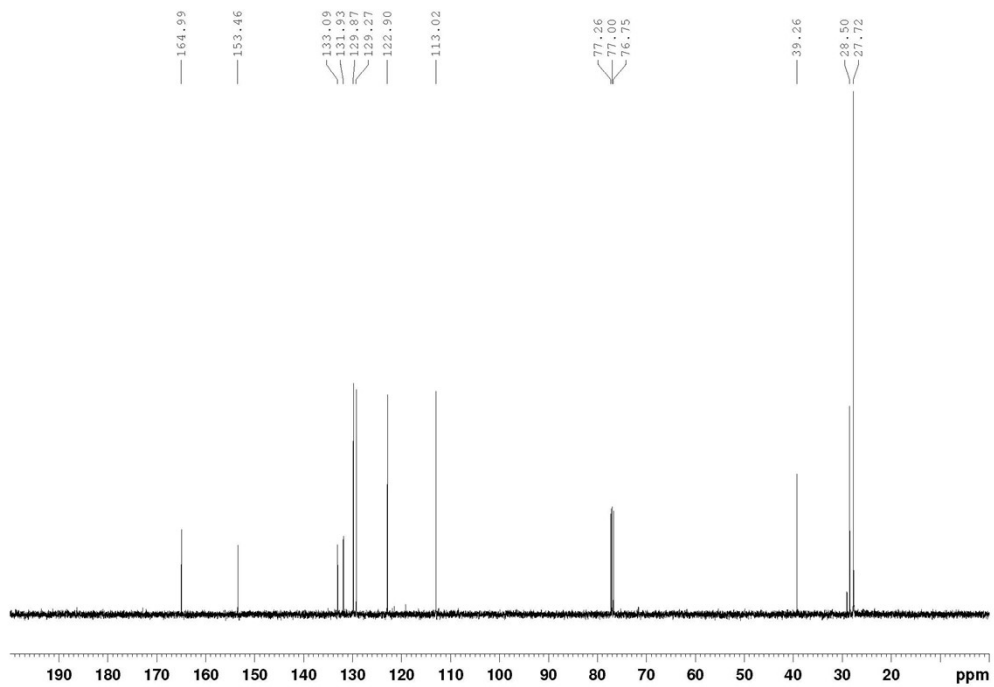

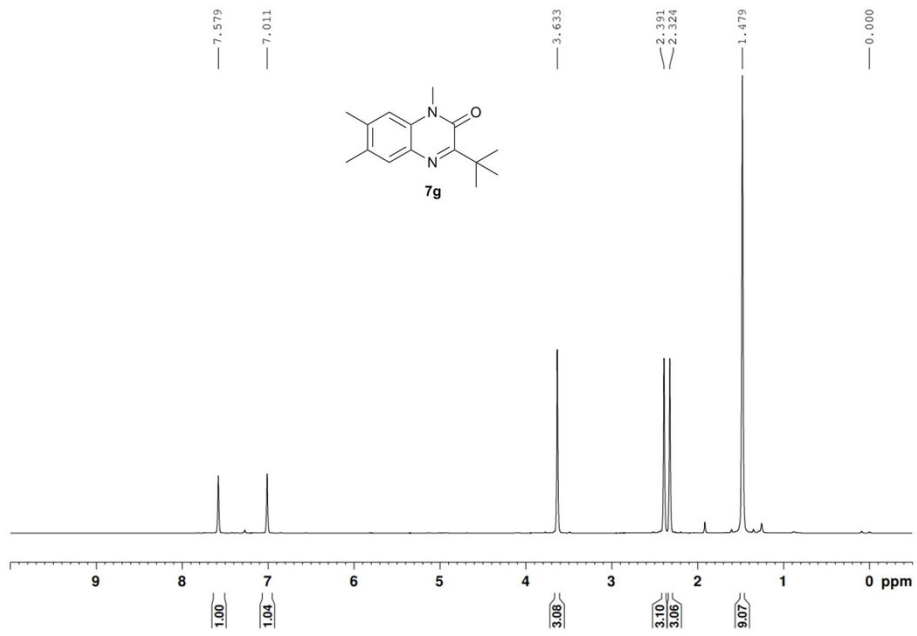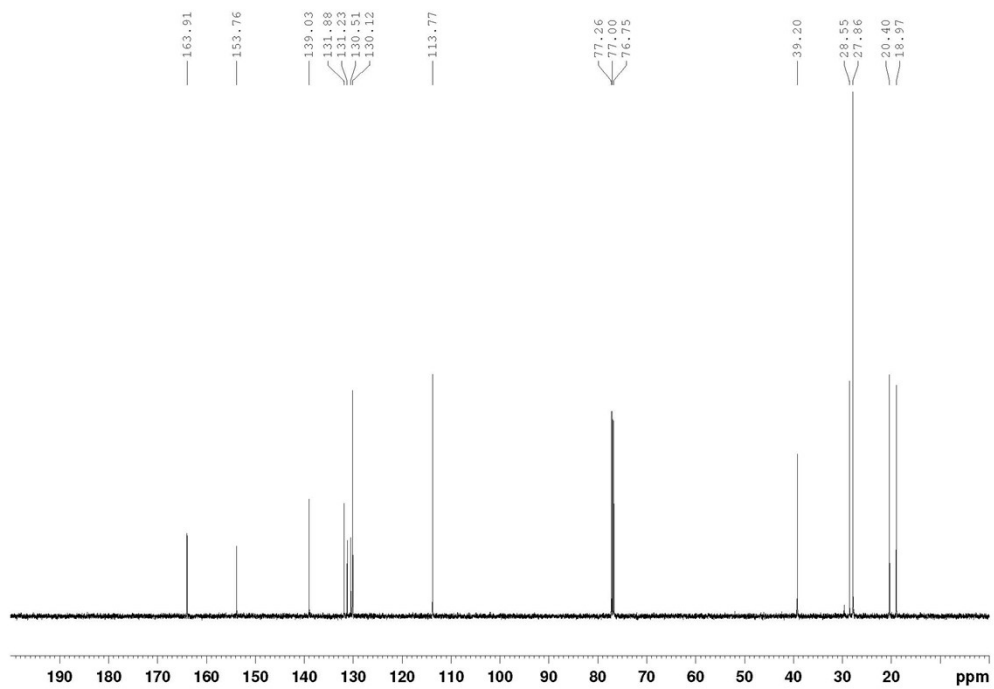

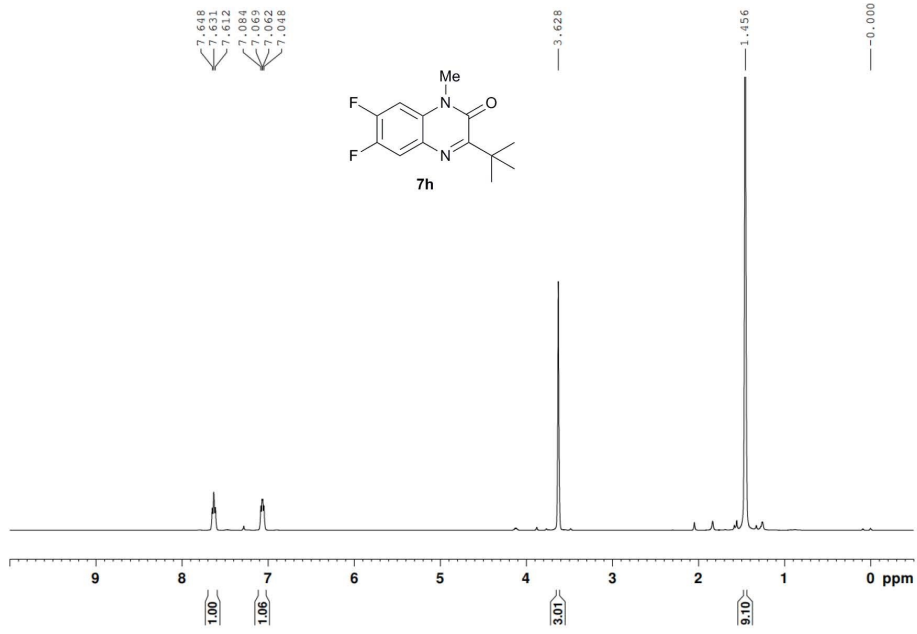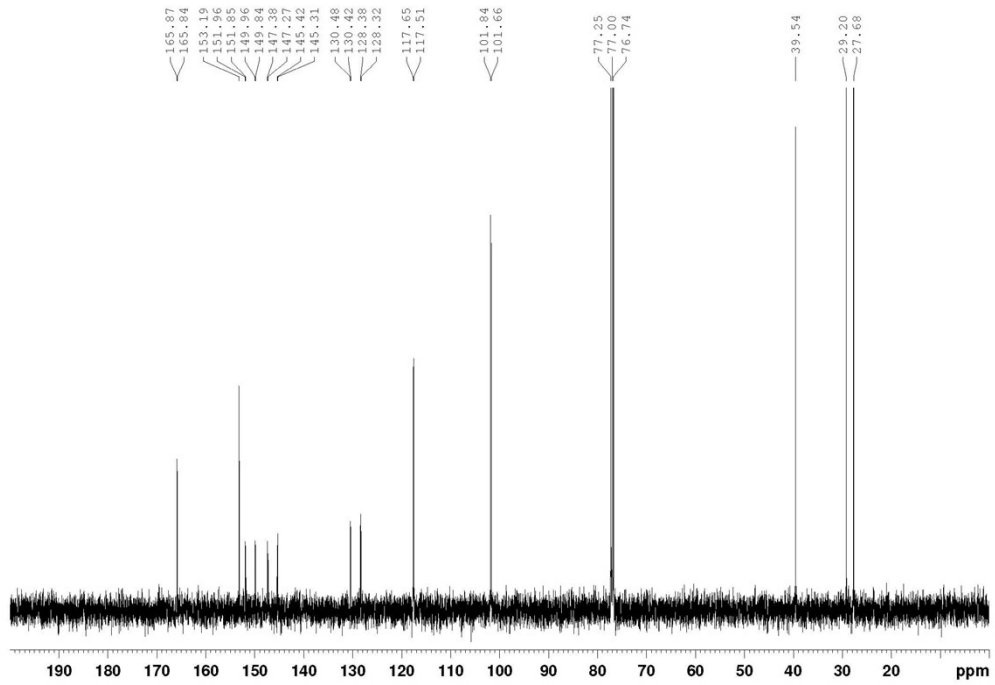

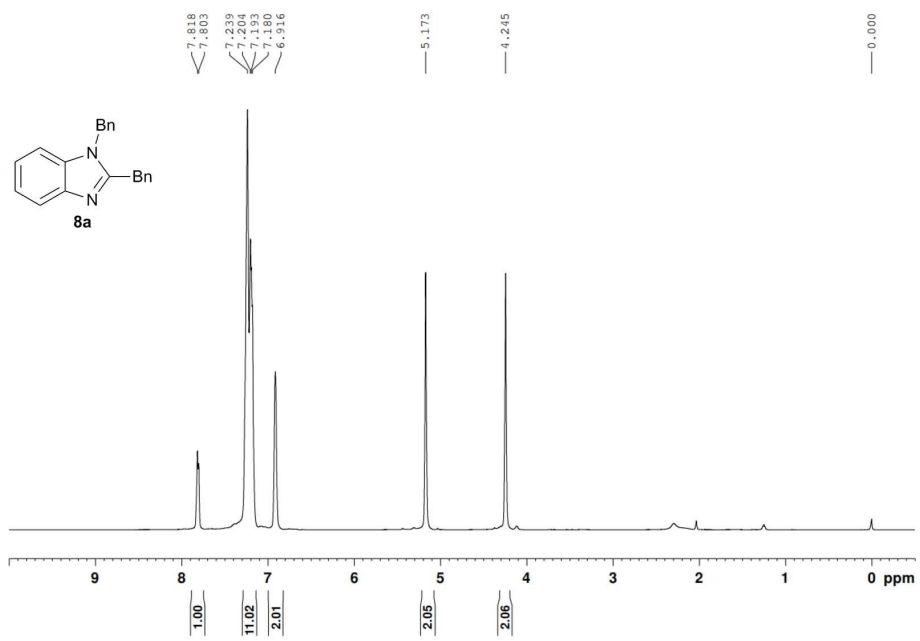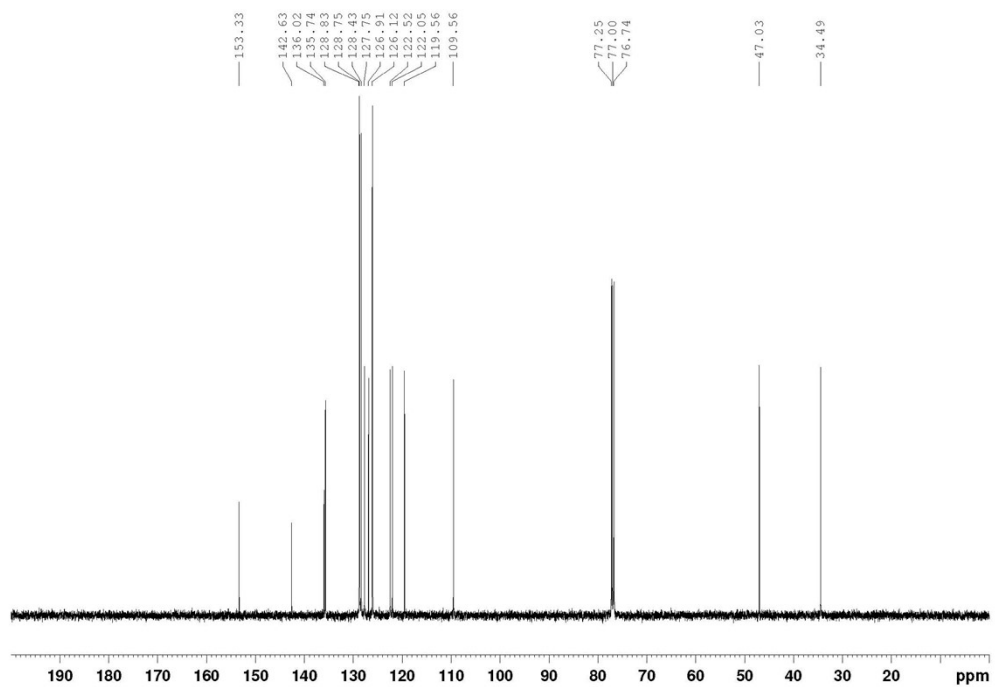

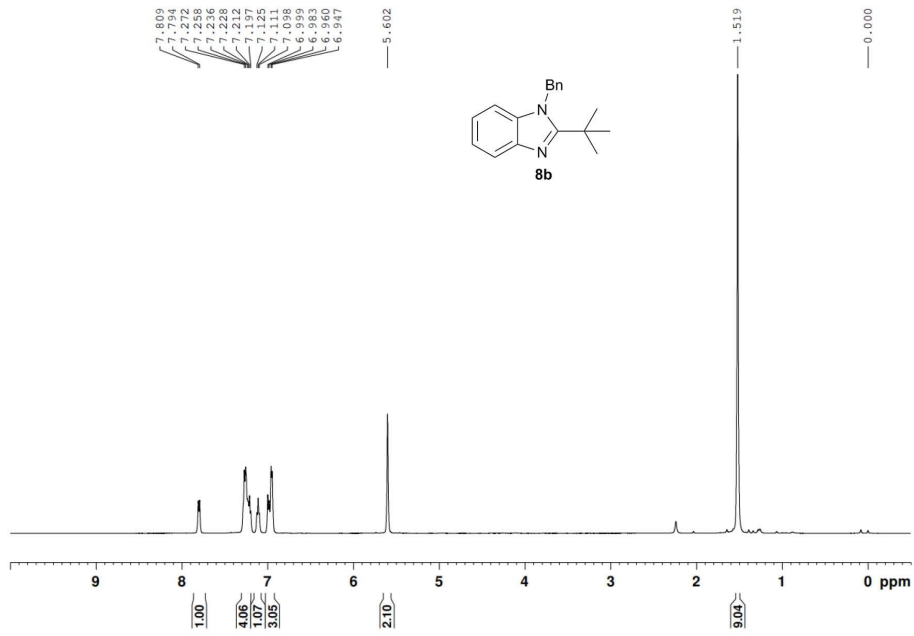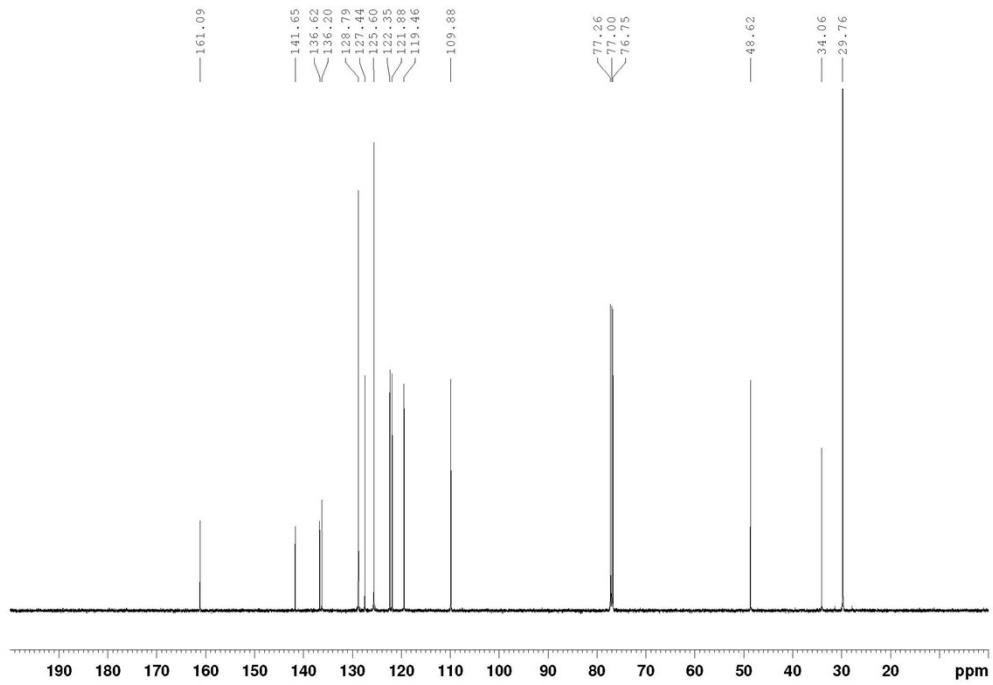



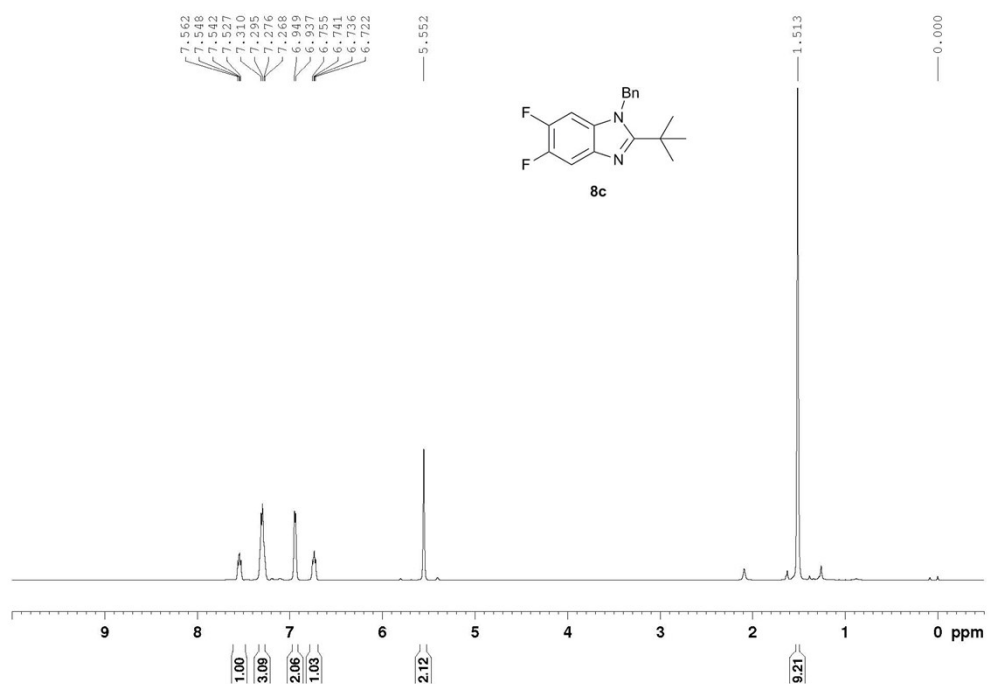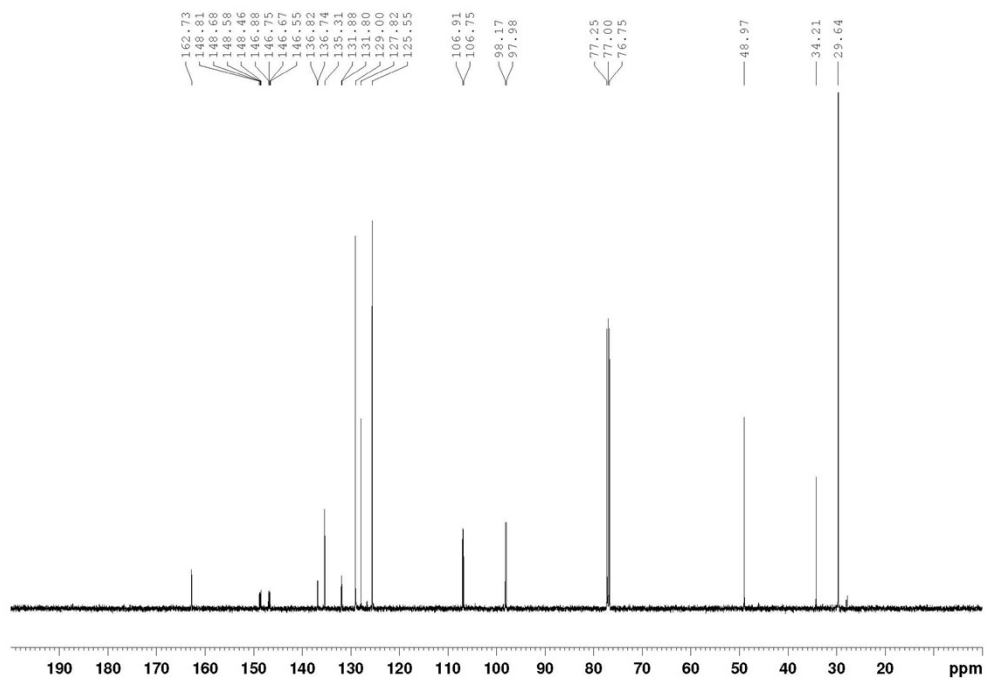

### References:

1. P. Thapa, P. M. Palacios, T. Tran, B. S. Pierce and F. W. Foss, *J. Org. Chem.*, 2020, **85**, 1991–2009
2. L. Zhao, C. Hu, X. Cong, G. Deng, L. L. Liu, M. Luo and X. Zeng, *J. Am. Chem. Soc.*, 2021, **143**, 1618–1629.

3. H. Kohatsu, S. Kamo, S. Tomoshige and K. Kuramochi, *Org. Lett.*, 2019, **21**, 7311–7314.
4. D. N. Kommi, P. S. Jadhavar, D. Kumar and A. K. Chakraborti, *Green Chem.*, 2013, **15**, 798-810.
5. M. Kljajic, J. G. Puschign, H. Weber, and R. Breinbauer, *Org. Lett.*, 2017, **19**, 126–129.
6. P. Xin, H. Niu, G. Qu, R. Ding and H. Guo, *Chem. Commun.*, 2012, **48**, 6717-6719.
7. Y. Chen, R. Zhang, Q. Peng, L. Xu and X. Pan, *Chem. Asian J.*, 2017, **12**, 2804-2808.
8. J. Kovvuri, B. Nagaraju, A. Kamal and A. K. Srivastava, *ACS Comb. Sci.*, 2016, **18**, 644–650.
9. G. Gao, C. Yang and W. Xia, *Chem. Commun.*, 2017, **53**, 1041-1044.
10. P. Saha, T. Ramana, N. Purkait, M. A. Ali, R. Paul and T. Punniyamurthy, *J. Org. Chem.*, 2009, **74**, 8719–8725.
11. Z. Zhu, J. Cen, X. Tang, J. Li, W. Wu and H. Jiang, *Adv. Synth. Catal.*, 2018, **360**, 2020-2031.
12. K. M. H. Nguyen and M. Llargeron, *Eur. J. Org. Chem.*, 2016, 1025–1032.
13. M. I. Crespo, L. Pagès, A. Vega, V. Segarra, M. López, T. Doménech, M. Miralpeix, J. Beleta, H. Ryder and J. M. Palacios, *J. Med. Chem.*, 1998, **41**, 4021–4035.
14. K. Niu, L. Song, Y. Hao, Y. Liu and Q. Wang, *Chem. Commun.*, 2020, **56**, 11673-11676.
15. G. C. Upreti, T. Singh, K. Khanna and A. Singh, *J. Org. Chem.*, 2023, **88**, 4422–4433.
16. S. Singh, N. Dagar and S. R. Roy, *Chem. Commun.*, 2022, **58**, 3831-3834.
17. L. Wang, Z. Chen, G. Fan, X. Liu and P. Liu, *J. Org. Chem.*, 2022, **87**, 14580-14587.
18. Z. Yan, B. Sun, X. Zhang, X. Zhuang, J. Yang, W. Su, and C. Jin, *Chemistry - An Asian Journal*, 2019, **14**, 3344-3349.
19. X. He, J. Lu, A. Zhang, Q. Zhang, G. Xu and J. Xuan, *Org. Lett.*, 2020, **22**, 5984–5989.
